# Supplementary material for: Saturation Mutagenesis of the Transmembrane Region of HokC in Escherichia coli Reveals Its High Tolerance to Mutations
Source: MDPI journal article supplement (doi:10.3390/ijms221910359), 2021-09-26
Supplement: s1 [file s1]

## SUPPORTING INFORMATION FOR

### Saturation mutagenesis of the transmembrane region of HokC in *Escherichia coli* reveals its high tolerance to mutations

Maria Teresa Lara Ortiz, Victor Martinell Garcia, Gabriel Del Rio

#### I. Supplemental Tables

**Table S1. Colonies counted under different IPTG concentrations.**

| IPTG (mM) | Exp 1 | Control | Exp 2 | Control | Exp 3 | Control |
|-----------|-------|---------|-------|---------|-------|---------|
| 0.01      | 86    | 237     | 105   | 105     | 107   | 162     |
| 0.05      | ---   | 253     | ---   | 241     | ---   | 151     |
| 0.1       | ---   | 124     | ---   | 230     | ---   | 334     |
| 0.2       | ---   | 192     | ---   | 120     | ---   | 268     |
| 0.4       | ---   | 213     | ---   | 211     | ---   | 218     |
| 0.6       | ---   | 227     | ---   | 245     | ---   | 231     |
| 0.8       | ---   | 263     | ---   | 210     | ---   | 202     |

Exp: Experiment; cells were grown in the presence of Kan 10 microg/mL and the indicated concentration of IPTG. Control: cells were grown in the absence of IPTG, only in the presence of Kan 10 microg/mL.

**Table S2. Observed phenotypes per mutated region of HokC.**

| Region             | Total isolated colonies | Wild-type phenotype | Mutant phenotype |
|--------------------|-------------------------|---------------------|------------------|
| <b>I (2-6)</b>     | <b>960</b>              | <b>531</b>          | <b>429</b>       |
| <b>II (7-9)</b>    | <b>1015</b>             | <b>807</b>          | <b>208</b>       |
| <b>III (10-12)</b> | <b>931</b>              | <b>346</b>          | <b>585</b>       |
| <b>IV (13-15)</b>  | <b>914</b>              | <b>320</b>          | <b>594</b>       |
| <b>V* (16-18)</b>  | <b>945</b>              | <b>246</b>          | <b>699</b>       |
| <b>VI (19-21)</b>  | <b>877</b>              | <b>657</b>          | <b>220</b>       |
| <b>VII (22-24)</b> | <b>777</b>              | <b>299</b>          | <b>478</b>       |

The mutated regions (I to VII; in parenthesis the positions included in each region is reported), with their corresponding number of isolated colonies identified with

mutant or wild-type phenotype are presented. Region V was reported previously by our group and is presented here for comparison.

**Table S3. Single-residue mutations found in every mutant of HokC with wild-type (A) and mutant (B) phenotypes.**

A)

| <b>Mutation</b> | <b>Occurrences</b> |
|-----------------|--------------------|
| V9*             | 302                |
| K2T             | 11672              |
| Y47X            | 15                 |
| K2S             | 10488              |
| K2R             | 40027              |
| K2Q             | 2167               |
| Y47T            | 6732               |
| K2P             | 826                |
| Y47S            | 102                |
| K2N             | 8232               |
| Y47R            | 5184               |
| K2M             | 965                |
| K2L             | 111                |
| Y47N            | 37                 |
| K2I             | 121                |
| K2H             | 395                |
| K2G             | 327                |
| K2F             | 46                 |
| K2E             | 3448               |
| K2D             | 688                |
| Y47H            | 59                 |
| K2C             | 118                |
| Y47F            | 65                 |
| K2A             | 2241               |
| Y47E            | 1                  |

|      |       |
|------|-------|
| Y47D | 32    |
| Y47C | 146   |
| K2*  | 843   |
| Y47* | 58    |
| V20Y | 1     |
| V20X | 3871  |
| V20W | 9452  |
| V20T | 12239 |
| V20S | 114   |
| V20R | 508   |
| V20Q | 546   |
| V20P | 5867  |
| V20N | 251   |
| V20M | 2389  |
| V20L | 3140  |
| V20K | 277   |
| V20I | 287   |
| V20H | 15    |
| V20G | 14772 |
| V20F | 291   |
| V20E | 1713  |
| V20D | 1290  |
| V20C | 11    |
| V20A | 9061  |
| V19Y | 3132  |
| V19X | 3891  |
| V19W | 15    |
| V19T | 2374  |
| V19S | 6610  |

|      |       |
|------|-------|
| V19R | 1896  |
| V19Q | 9543  |
| V19P | 5428  |
| V19N | 2653  |
| V19M | 929   |
| V19L | 11277 |
| V19K | 10    |
| V19I | 456   |
| V20* | 18    |
| V19H | 1205  |
| V19G | 7525  |
| V19F | 2628  |
| V19E | 1089  |
| V19D | 420   |
| V19C | 326   |
| V19A | 297   |
| T45X | 1     |
| T45V | 1     |
| T45S | 136   |
| T45R | 6750  |
| T45Q | 2     |
| T45P | 330   |
| T45M | 665   |
| T45L | 1     |
| T45K | 70    |
| T45I | 1     |
| T45G | 5177  |
| V19* | 6827  |
| T45E | 1     |

|      |       |
|------|-------|
| T45D | 2     |
| T45A | 529   |
| E50Y | 1     |
| A10Y | 1599  |
| E50X | 1     |
| A10X | 206   |
| E50W | 1     |
| E50V | 5220  |
| A10W | 958   |
| A10V | 5845  |
| A10T | 4005  |
| E50S | 6729  |
| A10S | 5778  |
| A10R | 2876  |
| E50Q | 8     |
| A10Q | 18    |
| A10P | 53509 |
| A10N | 623   |
| A10M | 36    |
| A10L | 1722  |
| E50K | 132   |
| A10K | 1255  |
| A10I | 1039  |
| E50H | 1     |
| A10H | 621   |
| E50G | 74    |
| A10G | 23322 |
| A10F | 771   |
| A10E | 275   |

|      |       |
|------|-------|
| E50D | 30    |
| A10D | 1705  |
| T45* | 2     |
| A10C | 1697  |
| E50A | 20    |
| E50* | 39    |
| A10* | 49    |
| R26X | 2     |
| I8Y  | 105   |
| I8X  | 338   |
| R26V | 1     |
| I8W  | 2428  |
| I8V  | 12185 |
| R26T | 11    |
| R26S | 113   |
| I8T  | 2865  |
| I8S  | 3836  |
| R26Q | 2     |
| I8R  | 8471  |
| I8Q  | 355   |
| I8P  | 7347  |
| R26N | 4     |
| I8N  | 756   |
| I8M  | 10274 |
| R26K | 5104  |
| I8L  | 23759 |
| E48X | 1     |
| I8K  | 1704  |
| R26I | 119   |

|      |       |
|------|-------|
| E48V | 23    |
| R26G | 117   |
| I8H  | 1161  |
| I8G  | 11455 |
| R26E | 6784  |
| E48S | 1     |
| I8F  | 49002 |
| A22Y | 31    |
| I8E  | 815   |
| A22X | 74    |
| E48Q | 12    |
| R26C | 1     |
| A22W | 570   |
| I8D  | 381   |
| E48P | 3     |
| I8C  | 5923  |
| A22V | 1280  |
| R26A | 2     |
| E48N | 6730  |
| A22T | 3327  |
| I8A  | 5448  |
| A22S | 2062  |
| A22R | 8937  |
| E48K | 99    |
| A22Q | 255   |
| A22P | 3352  |
| E48I | 5186  |
| A22N | 708   |
| E48G | 57    |

|      |       |
|------|-------|
| A22M | 134   |
| A22L | 883   |
| E48D | 150   |
| A22K | 181   |
| A22I | 78    |
| A22H | 490   |
| E48A | 49    |
| A22G | 727   |
| A22F | 103   |
| A22E | 1959  |
| A22D | 526   |
| R26* | 36    |
| I8*  | 100   |
| A21Y | 517   |
| A21X | 361   |
| A21W | 13    |
| A21V | 1920  |
| C30Y | 34    |
| A21T | 11407 |
| C30X | 4     |
| A21S | 3034  |
| C30W | 110   |
| A21R | 10148 |
| C30V | 6760  |
| A21Q | 7     |
| A21P | 11992 |
| E48* | 30    |
| C30S | 67    |
| C30R | 64    |



|      |       |
|------|-------|
| A21N | 330   |
| A21M | 744   |
| A21L | 1247  |
| A21K | 26    |
| A21I | 415   |
| A22* | 9     |
| C30M | 1     |
| A21H | 379   |
| C30L | 7     |
| A21G | 14051 |
| A21F | 200   |
| A21E | 329   |
| A21D | 99    |
| A21C | 6     |
| C30G | 126   |
| C30F | 126   |
| A6Y  | 24    |
| A6X  | 325   |
| A6W  | 840   |
| A6V  | 3659  |
| A6T  | 453   |
| A6S  | 807   |
| A6R  | 8360  |
| V13Y | 2121  |
| A6Q  | 145   |
| A6P  | 2946  |
| V13X | 3870  |
| V13W | 685   |
| A6N  | 7     |

|      |       |
|------|-------|
| A6M  | 42    |
| V13T | 2000  |
| A6L  | 554   |
| V13S | 9585  |
| A6K  | 53    |
| V13R | 159   |
| V13Q | 23    |
| A6I  | 5     |
| V13P | 4283  |
| A6H  | 118   |
| A6G  | 52275 |
| V13N | 225   |
| A6F  | 17    |
| A6E  | 4551  |
| V13M | 81    |
| V13L | 4313  |
| A6D  | 2429  |
| A6C  | 44    |
| V13K | 55    |
| A21* | 31    |
| V13I | 1961  |
| V13H | 4806  |
| V13G | 3677  |
| C30* | 5088  |
| V13F | 14707 |
| V13E | 737   |
| V13D | 2992  |
| V13C | 481   |
| V13A | 12157 |

|      |       |
|------|-------|
| A6*  | 95    |
| I34X | 5     |
| V13* | 109   |
| I34V | 81    |
| I34T | 68    |
| I34S | 7057  |
| I34R | 2     |
| I34P | 5084  |
| I34N | 155   |
| I34M | 19    |
| I34L | 150   |
| Q3Y  | 34    |
| I34K | 4     |
| Q3X  | 374   |
| Q3W  | 150   |
| Q3V  | 143   |
| I34H | 10    |
| Q3T  | 1746  |
| I34F | 33    |
| Q3S  | 5993  |
| Q3R  | 33876 |
| I34C | 1     |
| Q3P  | 8363  |
| Q3N  | 1051  |
| Q3M  | 147   |
| Q3L  | 2424  |
| Q3K  | 7971  |
| Q3I  | 42    |
| Q3H  | 11346 |

|      |       |
|------|-------|
| Q3G  | 822   |
| Q3F  | 5     |
| Q3E  | 4026  |
| Q3D  | 471   |
| Q3C  | 236   |
| Q3A  | 1989  |
| Q3*  | 310   |
| L11Y | 190   |
| L11X | 514   |
| L11W | 7195  |
| L11V | 14823 |
| L11T | 2094  |
| L11S | 3732  |
| V43X | 1     |
| L11R | 25224 |
| L11Q | 1545  |
| L11P | 4684  |
| L11N | 194   |
| L11M | 5666  |
| L11K | 1613  |
| L11I | 869   |
| L11H | 2080  |
| V43M | 1     |
| L11G | 14067 |
| V43L | 6     |
| L11F | 2835  |
| L11E | 2683  |
| L11D | 4146  |
| V43I | 48    |

|      |       |
|------|-------|
| L11C | 479   |
| V43H | 1     |
| V43G | 96    |
| L11A | 4395  |
| V43F | 11947 |
| V43E | 2     |
| V43D | 31    |
| V43C | 4     |
| V43A | 30    |
| L11* | 7137  |
| T25X | 27    |
| T25V | 1     |
| T25S | 74    |
| T25R | 6808  |
| T25Q | 8     |
| T25P | 299   |
| T25M | 45    |
| T25L | 1     |
| T25K | 86    |
| T25G | 2     |
| T25E | 4978  |
| V41X | 2     |
| T25A | 463   |
| V41S | 1     |
| V41L | 6738  |
| V41I | 30    |
| V41G | 56    |
| V41F | 68    |
| V41E | 1     |

|      |       |
|------|-------|
| V41D | 23    |
| V41C | 5156  |
| V41A | 25    |
| T25* | 4     |
| S49Y | 58    |
| S49X | 1     |
| S49T | 119   |
| S49R | 5187  |
| S49P | 6808  |
| S49N | 2     |
| S49L | 1     |
| S49H | 1     |
| S49G | 1     |
| S49F | 60    |
| S49C | 10    |
| S49A | 262   |
| I16Y | 265   |
| I16X | 3812  |
| I16W | 2     |
| I16V | 1269  |
| I16T | 52882 |
| I16S | 15550 |
| I16R | 372   |
| I16Q | 8     |
| I16P | 7345  |
| I16N | 1802  |
| I16M | 164   |
| I16L | 9567  |
| I16K | 73    |

|      |       |
|------|-------|
| I16H | 5277  |
| I16G | 51    |
| I16F | 4518  |
| I16E | 3     |
| I16D | 82    |
| I16C | 356   |
| I16A | 811   |
| I16* | 6     |
| I14Y | 485   |
| I14X | 3826  |
| I14W | 607   |
| I14V | 5437  |
| I14T | 4596  |
| I14S | 12235 |
| I14R | 3575  |
| I14Q | 14    |
| I14P | 1110  |
| I14N | 2301  |
| I14M | 3211  |
| I14L | 20774 |
| I14K | 6441  |
| I14H | 171   |
| I14G | 1412  |
| I14F | 31394 |
| I14E | 37    |
| I14D | 71    |
| I14C | 1418  |
| I14A | 667   |
| I14* | 341   |

|      |       |
|------|-------|
| I12Y | 1079  |
| I12X | 482   |
| I12W | 2643  |
| I12V | 9956  |
| I12T | 12825 |
| I12S | 24472 |
| I12R | 10151 |
| I12Q | 838   |
| I12P | 3632  |
| I12N | 757   |
| I12M | 8093  |
| I12L | 18933 |
| I12K | 364   |
| L29X | 2     |
| I12H | 216   |
| L29V | 18    |
| I12G | 14335 |
| I12F | 20626 |
| L29T | 1     |
| L29S | 6763  |
| I12E | 486   |
| L29R | 207   |
| I12D | 88    |
| I12C | 5590  |
| L29P | 79    |
| I12A | 10191 |
| R35X | 3     |
| L29I | 68    |
| L29H | 90    |



|      |      |
|------|------|
| L29G | 2    |
| R35S | 1    |
| L29F | 30   |
| R35Q | 168  |
| R35P | 26   |
| R35N | 5084 |
| L29A | 3    |
| R35L | 69   |
| R35H | 1    |
| R35G | 19   |
| R35E | 6752 |
| I12* | 2175 |
| R35D | 3    |
| V24Y | 242  |
| V24X | 42   |
| R35A | 1    |
| V24W | 16   |
| V24T | 419  |
| V24S | 3150 |
| V24R | 3929 |
| V24Q | 649  |
| V24P | 3457 |
| V24N | 5841 |
| V24M | 19   |
| V24L | 1763 |
| V24K | 8    |
| V24I | 147  |
| V24H | 1108 |
| V24G | 939  |

|      |      |
|------|------|
| V24F | 431  |
| V24E | 112  |
| V24D | 285  |
| V24C | 138  |
| V24A | 319  |
| R35* | 62   |
| V24* | 7586 |
| T39X | 1    |
| T39W | 1    |
| T39V | 3    |
| T39S | 80   |
| T39R | 6773 |
| T39Q | 4    |
| T39P | 175  |
| T39M | 47   |
| T39L | 1    |
| T39K | 38   |
| L23Y | 1    |
| L23X | 10   |
| L23W | 6773 |
| L23V | 2945 |
| T39G | 5116 |
| L23T | 699  |
| T39E | 5    |
| L23S | 36   |
| L23R | 880  |
| L23Q | 172  |
| H33Y | 57   |
| L23P | 6430 |

|      |       |
|------|-------|
| T39A | 276   |
| H33X | 5     |
| L23M | 932   |
| H33T | 6751  |
| L23K | 1580  |
| H33S | 5     |
| M7Y  | 493   |
| H33R | 278   |
| H33Q | 95    |
| L23I | 939   |
| M7X  | 159   |
| M7W  | 8711  |
| H33P | 342   |
| L23H | 210   |
| A18Y | 5     |
| A18X | 3798  |
| M7V  | 17044 |
| L23G | 5491  |
| H33N | 77    |
| L23F | 98    |
| M7T  | 2797  |
| L23E | 856   |
| A18V | 57    |
| H33L | 107   |
| M7S  | 5151  |
| L23D | 3     |
| M7R  | 17064 |
| A18T | 318   |
| H33K | 2     |

|      |       |
|------|-------|
| L23C | 50    |
| M7Q  | 1096  |
| A18S | 74    |
| M7P  | 4495  |
| A18R | 4826  |
| L23A | 168   |
| H33I | 1     |
| A18P | 6984  |
| M7N  | 1235  |
| M7L  | 27167 |
| A18N | 1     |
| M7K  | 1912  |
| H33D | 12    |
| A18L | 2     |
| M7I  | 5711  |
| M7H  | 363   |
| M7G  | 11714 |
| M7F  | 2268  |
| A18H | 4     |
| M7E  | 482   |
| A18G | 104   |
| M7D  | 2714  |
| M7C  | 2002  |
| A18E | 4     |
| A18D | 109   |
| M7A  | 5540  |
| L23* | 37    |
| M7*  | 7592  |
| T36Y | 1     |

|      |      |
|------|------|
| T36X | 2    |
| T36W | 5087 |
| T36S | 157  |
| T36R | 2    |
| T36P | 360  |
| T36N | 82   |
| T36M | 2    |
| T36L | 6759 |
| T36K | 1    |
| T36I | 40   |
| T36H | 1    |
| T36G | 1    |
| T36D | 3    |
| T36C | 1    |
| T36A | 376  |
| T36* | 2    |
| E40X | 1    |
| E40W | 1    |
| E40V | 49   |
| E40S | 18   |
| E40R | 6733 |
| E40Q | 7    |
| E40K | 57   |
| E40G | 5265 |
| E40D | 82   |
| E40A | 59   |
| E40* | 43   |
| M1T  | 2061 |
| M1S  | 29   |

|      |       |
|------|-------|
| M1R  | 65816 |
| M1K  | 9962  |
| M1I  | 11826 |
| D28Y | 89    |
| D28V | 824   |
| D28T | 6772  |
| D28S | 8     |
| D28R | 1     |
| D28Q | 1     |
| D28P | 5004  |
| D28N | 47    |
| D28K | 3     |
| D28I | 4     |
| D28H | 21    |
| D28G | 1240  |
| A46X | 2     |
| D28F | 5     |
| D28E | 162   |
| F44Y | 59    |
| F44X | 65    |
| A46V | 56    |
| D28C | 4     |
| A46T | 633   |
| F44V | 63    |
| D28A | 1447  |
| A46S | 53    |
| F44S | 6796  |
| A46P | 18    |
| A46N | 2     |

|      |       |
|------|-------|
| F44P | 1     |
| A46L | 11915 |
| F44N | 2     |
| A46K | 1     |
| F44L | 164   |
| F44I | 41    |
| A46G | 38    |
| F44H | 5171  |
| A46F | 1     |
| F44G | 1     |
| A46E | 1     |
| A46D | 110   |
| F44C | 101   |
| H4Y  | 1022  |
| H4X  | 629   |
| H4W  | 41    |
| H4V  | 306   |
| H4T  | 896   |
| H4S  | 682   |
| H4R  | 4119  |
| F44* | 1     |
| H4Q  | 46515 |
| H4P  | 1337  |
| H4N  | 14709 |
| H4M  | 270   |
| H4L  | 4525  |
| H4K  | 14108 |
| H4I  | 7084  |
| H4G  | 214   |

|      |      |
|------|------|
| H4F  | 46   |
| H4E  | 1897 |
| H4D  | 1753 |
| H4C  | 62   |
| H4A  | 55   |
| H4*  | 2287 |
| Q38X | 7    |
| Q38V | 1    |
| Q38T | 1    |
| Q38S | 4    |
| Q38R | 6838 |
| Q38P | 43   |
| Q38N | 7    |
| Q38L | 31   |
| Q38K | 124  |
| Q38H | 46   |
| Q38G | 3    |
| Q38E | 52   |
| Q38D | 5100 |
| Q38C | 1    |
| A42X | 3    |
| A42W | 1    |
| C15Y | 7296 |
| A42V | 323  |
| C15X | 3821 |
| C15W | 1448 |
| A42T | 124  |
| C15V | 9711 |
| A42S | 52   |



|      |       |
|------|-------|
| A42R | 3     |
| C15T | 626   |
| C15S | 3397  |
| A42P | 4     |
| C15R | 4939  |
| C15Q | 118   |
| C15P | 2806  |
| A42L | 6732  |
| C15N | 142   |
| C15L | 2802  |
| Q38* | 75    |
| C15K | 551   |
| A42G | 43    |
| C15I | 106   |
| C15H | 6470  |
| A42E | 1     |
| C15G | 13446 |
| A42D | 59    |
| C15F | 16295 |
| A42C | 5161  |
| C15E | 4607  |
| E31Y | 2     |
| C15D | 401   |
| E31X | 5     |
| E31W | 3     |
| E31V | 67    |
| C15A | 853   |
| E31S | 14    |
| E31R | 6744  |

|      |        |
|------|--------|
| E31Q | 14     |
| E31N | 1      |
| E31K | 66     |
| E31G | 5211   |
| E31D | 141    |
| T17Y | 1      |
| T17X | 3817   |
| E31A | 114    |
| T17S | 3433   |
| C15* | 3496   |
| T17R | 4813   |
| T17P | 51372  |
| T17N | 39     |
| T17L | 3      |
| T17K | 1      |
| T17I | 43     |
| T17H | 8      |
| T17G | 2      |
| T17D | 8      |
| T17C | 6      |
| T17A | 15882  |
| E31* | 70     |
| K5Y  | 13     |
| K5X  | 438    |
| K5W  | 180    |
| K5V  | 240    |
| K5T  | 2657   |
| K5S  | 496    |
| K5R  | 103567 |

|      |       |
|------|-------|
| K5Q  | 1446  |
| K5P  | 843   |
| K5N  | 246   |
| K5M  | 1214  |
| K5L  | 272   |
| K5I  | 13    |
| K5H  | 94    |
| K5G  | 10270 |
| K5F  | 16    |
| K5E  | 6297  |
| K5D  | 42    |
| V32Y | 1     |
| K5C  | 15    |
| V32X | 1     |
| K5A  | 793   |
| V32S | 5061  |
| V32N | 1     |
| V32M | 1     |
| V32L | 37    |
| V32I | 73    |
| K27X | 88    |
| V32G | 124   |
| V32F | 6878  |
| V32E | 2     |
| V32D | 44    |
| K27T | 106   |
| V32C | 3     |
| K27S | 2     |
| K27R | 5101  |

|      |       |
|------|-------|
| V32A | 35    |
| K27Q | 112   |
| K5*  | 397   |
| G37X | 5     |
| K27P | 3     |
| G37W | 2     |
| K27N | 183   |
| G37V | 78    |
| V9Y  | 352   |
| K27M | 1     |
| V9X  | 190   |
| G37T | 1     |
| V9W  | 30    |
| G37S | 66    |
| G37R | 15    |
| K27I | 28    |
| V9T  | 987   |
| G37P | 5094  |
| K27H | 2     |
| V9S  | 10631 |
| K27G | 1     |
| V9R  | 5556  |
| G37N | 1     |
| V9Q  | 459   |
| K27E | 74    |
| V9P  | 7616  |
| K27D | 2     |
| G37L | 2     |
| V9N  | 655   |

|      |       |
|------|-------|
| V9M  | 319   |
| V9L  | 4822  |
| V9K  | 459   |
| G37F | 1     |
| V9I  | 966   |
| G37D | 848   |
| V9H  | 870   |
| V9G  | 30343 |
| G37C | 56    |
| V32* | 2     |
| V9F  | 3555  |
| V9E  | 2254  |
| G37A | 6774  |
| V9D  | 2385  |
| V9C  | 562   |
| V9A  | 44989 |
| K27* | 40    |
| K2Y  | 40    |
| K2X  | 213   |
| K2W  | 39    |
| K2V  | 892   |

**B)**

| <b>Mutation</b> | <b>Occurrences</b> |
|-----------------|--------------------|
| V9*             | 755                |
| K2T             | 8207               |
| Y47X            | 12                 |
| K2S             | 11657              |
| K2R             | 24565              |

|      |       |
|------|-------|
| K2Q  | 2131  |
| Y47T | 9969  |
| K2P  | 299   |
| Y47S | 111   |
| K2N  | 5575  |
| Y47R | 6898  |
| K2M  | 1199  |
| K2L  | 318   |
| Y47N | 38    |
| K2I  | 269   |
| K2H  | 1122  |
| Y47L | 3     |
| K2G  | 1089  |
| K2F  | 1     |
| K2E  | 2740  |
| K2D  | 343   |
| Y47H | 33    |
| K2C  | 110   |
| Y47F | 78    |
| K2A  | 2997  |
| Y47E | 1     |
| Y47D | 49    |
| Y47C | 137   |
| Y47A | 1     |
| K2*  | 935   |
| Y47* | 60    |
| V20Y | 1     |
| V20X | 10501 |
| V20W | 10082 |

|      |       |
|------|-------|
| V20T | 1952  |
| V20S | 50    |
| V20R | 736   |
| V20Q | 18    |
| V20P | 4959  |
| V20N | 10    |
| V20M | 133   |
| V20L | 2199  |
| V20I | 14    |
| V20H | 8     |
| V20G | 9711  |
| V20F | 13    |
| V20E | 13320 |
| V20D | 183   |
| V20C | 34    |
| V20A | 7189  |
| V19Y | 400   |
| V19X | 8572  |
| V19W | 6     |
| V19T | 694   |
| V19S | 7130  |
| V19R | 45    |
| V19Q | 27    |
| V19P | 19209 |
| V19N | 6     |
| V19M | 3     |
| V19L | 391   |
| V19K | 4     |
| V19I | 1924  |

|      |       |
|------|-------|
| V20* | 1     |
| V19H | 25    |
| V19G | 11908 |
| V19F | 555   |
| V19E | 90    |
| V19D | 11    |
| V19C | 34    |
| V19A | 5067  |
| T45X | 1     |
| T45W | 1     |
| T45S | 159   |
| T45R | 9997  |
| T45Q | 5     |
| T45P | 405   |
| T45M | 524   |
| T45L | 2     |
| T45K | 105   |
| T45G | 6893  |
| V19* | 10404 |
| T45E | 3     |
| T45A | 602   |
| A10Y | 655   |
| E50X | 2     |
| A10X | 3538  |
| E50V | 6917  |
| A10W | 1145  |
| A10V | 2240  |
| A10T | 4179  |
| E50S | 9965  |



|      |       |
|------|-------|
| A10S | 5900  |
| E50R | 1     |
| A10R | 5950  |
| E50Q | 15    |
| A10Q | 305   |
| E50P | 1     |
| A10P | 46475 |
| E50N | 1     |
| A10N | 833   |
| A10M | 12    |
| A10L | 1976  |
| E50K | 88    |
| A10K | 1576  |
| A10I | 36    |
| A10H | 2290  |
| E50G | 86    |
| A10G | 21474 |
| A10F | 499   |
| A10E | 3506  |
| E50D | 49    |
| A10D | 2791  |
| A10C | 1624  |
| E50A | 33    |
| E50* | 31    |
| A10* | 375   |
| R26X | 1     |
| I8Y  | 49    |
| I8X  | 3497  |
| R26V | 3     |

|      |       |
|------|-------|
| I8W  | 417   |
| I8V  | 8042  |
| R26T | 19    |
| R26S | 121   |
| I8T  | 3087  |
| I8S  | 2697  |
| R26Q | 2     |
| I8R  | 4344  |
| I8Q  | 97    |
| I8P  | 5122  |
| R26N | 2     |
| R26M | 1     |
| I8N  | 1151  |
| I8M  | 9020  |
| R26K | 6748  |
| E48Y | 1     |
| I8L  | 19153 |
| I8K  | 1464  |
| R26I | 139   |
| E48V | 18    |
| R26G | 147   |
| I8H  | 1688  |
| I8G  | 7556  |
| R26E | 10012 |
| I8F  | 25155 |
| E48R | 2     |
| A22Y | 1     |
| R26D | 1     |
| A22X | 4532  |

|      |       |
|------|-------|
| I8E  | 1495  |
| E48Q | 7     |
| R26C | 1     |
| A22W | 1305  |
| I8D  | 614   |
| E48P | 1     |
| I8C  | 6178  |
| A22V | 1234  |
| R26A | 2     |
| E48N | 9968  |
| I8A  | 4502  |
| A22T | 2864  |
| A22S | 1753  |
| A22R | 12449 |
| E48K | 88    |
| A22Q | 116   |
| E48I | 6898  |
| A22P | 866   |
| E48G | 68    |
| A22N | 5     |
| A22M | 1526  |
| A22L | 429   |
| E48D | 181   |
| A22K | 126   |
| A22I | 52    |
| A22H | 2769  |
| E48A | 75    |
| A22G | 2201  |
| A22F | 454   |

|      |       |
|------|-------|
| A22E | 247   |
| A22D | 1     |
| R26* | 39    |
| I8*  | 142   |
| A21Y | 63    |
| A21X | 12960 |
| A21W | 500   |
| A21V | 6036  |
| C30Y | 51    |
| A21T | 2035  |
| C30X | 18    |
| A21S | 2701  |
| C30W | 133   |
| C30V | 10003 |
| A21R | 10122 |
| A21Q | 11    |
| A21P | 4218  |
| E48* | 39    |
| C30S | 78    |
| C30R | 76    |
| A21N | 6     |
| A21M | 5     |
| A21L | 4509  |
| A21K | 37    |
| C30N | 1     |
| A22* | 2606  |
| A21I | 29    |
| A21H | 3747  |
| C30L | 8     |

|      |       |
|------|-------|
| A21G | 7469  |
| A21F | 380   |
| A21E | 1438  |
| A21D | 1478  |
| C30G | 167   |
| A21C | 2     |
| C30F | 101   |
| C30E | 1     |
| A6Y  | 15    |
| C30D | 1     |
| A6X  | 1221  |
| A6W  | 526   |
| A6V  | 3204  |
| C30A | 1     |
| A6T  | 448   |
| A6S  | 747   |
| A6R  | 11288 |
| A6Q  | 518   |
| V13Y | 628   |
| A6P  | 2089  |
| V13X | 1183  |
| V13W | 419   |
| A6N  | 7     |
| A6M  | 290   |
| V13T | 1263  |
| A6L  | 1034  |
| V13S | 13241 |
| A6K  | 127   |
| V13R | 778   |

|      |       |
|------|-------|
| V13Q | 114   |
| A6I  | 2     |
| V13P | 4787  |
| A6H  | 145   |
| A6G  | 30582 |
| V13N | 1325  |
| A6F  | 4     |
| A6E  | 3888  |
| V13M | 1555  |
| V13L | 6108  |
| A6D  | 3618  |
| V13K | 1007  |
| A21* | 3864  |
| A6C  | 31    |
| V13I | 1984  |
| V13H | 6520  |
| V13G | 18395 |
| C30* | 6765  |
| V13F | 9562  |
| V13E | 3969  |
| V13D | 4914  |
| V13C | 1738  |
| V13A | 13043 |
| A6*  | 229   |
| I34X | 1     |
| V13* | 92    |
| I34V | 88    |
| I34T | 80    |
| I34S | 10335 |

|      |       |
|------|-------|
| I34R | 3     |
| I34P | 6760  |
| I34N | 194   |
| I34M | 18    |
| I34L | 161   |
| Q3Y  | 29    |
| I34K | 3     |
| Q3X  | 978   |
| Q3W  | 923   |
| Q3V  | 124   |
| I34H | 6     |
| I34G | 1     |
| Q3T  | 1191  |
| I34F | 32    |
| Q3S  | 9186  |
| Q3R  | 21695 |
| I34C | 1     |
| Q3P  | 5650  |
| Q3N  | 507   |
| Q3M  | 274   |
| Q3L  | 2172  |
| Q3K  | 6402  |
| Q3I  | 25    |
| Q3H  | 7237  |
| Q3G  | 1059  |
| Q3F  | 4     |
| Q3E  | 3172  |
| Q3D  | 338   |
| Q3C  | 312   |

|      |       |
|------|-------|
| Q3A  | 3048  |
| Q3*  | 451   |
| L11Y | 245   |
| L11X | 2389  |
| L11W | 5545  |
| L11V | 9196  |
| L11T | 2693  |
| V43Y | 1     |
| L11S | 1761  |
| L11R | 29759 |
| V43W | 1     |
| L11Q | 5527  |
| L11P | 9772  |
| V43T | 1     |
| L11N | 74    |
| V43S | 1     |
| L11M | 2533  |
| L11K | 2786  |
| L11I | 229   |
| V43N | 2     |
| L11H | 1517  |
| L11G | 16308 |
| V43L | 11    |
| L11F | 1107  |
| V43K | 1     |
| L11E | 3236  |
| L11D | 5811  |
| V43I | 43    |
| L11C | 276   |



|      |       |
|------|-------|
| V43G | 100   |
| L11A | 2636  |
| V43F | 16905 |
| V43E | 2     |
| V43D | 33    |
| V43C | 6     |
| V43A | 26    |
| L11* | 13613 |
| T25X | 1211  |
| T25W | 1     |
| T25V | 2     |
| T25S | 121   |
| T25R | 10043 |
| T25Q | 9     |
| T25P | 321   |
| T25M | 48    |
| T25L | 1     |
| T25K | 94    |
| T25G | 1     |
| T25E | 6640  |
| V41Y | 4     |
| T25D | 1     |
| V41X | 4     |
| V41W | 2     |
| T25A | 359   |
| V41S | 2     |
| V41M | 1     |
| V41L | 9980  |
| V41I | 25    |

|      |       |
|------|-------|
| V41G | 76    |
| V41F | 70    |
| V41E | 1     |
| V41D | 27    |
| V41C | 6855  |
| V41A | 25    |
| T25* | 2     |
| S49Y | 85    |
| S49X | 1     |
| S49T | 72    |
| S49R | 6898  |
| S49P | 10028 |
| S49N | 2     |
| S49F | 44    |
| S49C | 14    |
| S49A | 195   |
| I16Y | 164   |
| I16X | 101   |
| I16W | 4     |
| I16V | 1314  |
| I16T | 26982 |
| I16S | 15520 |
| I16R | 333   |
| I16Q | 8     |
| I16P | 3658  |
| I16N | 1604  |
| I16M | 213   |
| I16L | 6224  |
| I16K | 75    |

|      |       |
|------|-------|
| I16H | 6675  |
| I16G | 47    |
| I16F | 3615  |
| I16E | 4     |
| I16D | 65    |
| S49* | 8     |
| I16C | 304   |
| I16A | 541   |
| I16* | 14    |
| I14Y | 409   |
| I14X | 251   |
| I14W | 1830  |
| I14V | 7014  |
| I14T | 7920  |
| I14S | 16992 |
| I14R | 10481 |
| I14Q | 490   |
| I14P | 5830  |
| I14N | 3376  |
| I14M | 3975  |
| I14L | 13087 |
| I14K | 1677  |
| I14H | 368   |
| I14G | 5702  |
| I14F | 16671 |
| I14E | 1848  |
| I14D | 2223  |
| I14C | 1787  |
| I14A | 3920  |

|      |       |
|------|-------|
| I14* | 153   |
| I12Y | 1712  |
| I12X | 2135  |
| I12W | 2487  |
| I12V | 9998  |
| I12T | 10486 |
| I12S | 21608 |
| I12R | 16617 |
| I12Q | 1767  |
| I12P | 10841 |
| I12N | 2596  |
| I12M | 3574  |
| I12L | 10455 |
| I12K | 2126  |
| L29Y | 1     |
| L29X | 1     |
| I12H | 2487  |
| L29V | 30    |
| I12G | 14911 |
| I12F | 10518 |
| L29T | 1     |
| L29S | 10005 |
| I12E | 1921  |
| I12D | 1391  |
| L29R | 251   |
| I12C | 2810  |
| L29Q | 4     |
| L29P | 72    |
| I12A | 6497  |

|      |       |
|------|-------|
| L29N | 1     |
| R35Y | 1     |
| L29M | 1     |
| R35X | 2     |
| L29I | 81    |
| L29H | 101   |
| L29F | 24    |
| R35Q | 139   |
| R35P | 16    |
| L29C | 2     |
| R35N | 6762  |
| L29A | 1     |
| R35L | 50    |
| R35K | 3     |
| R35G | 15    |
| R35E | 10000 |
| I12* | 3079  |
| R35D | 4     |
| V24Y | 9     |
| V24X | 1638  |
| V24W | 1903  |
| V24T | 2510  |
| V24S | 3992  |
| V24R | 403   |
| V24Q | 2     |
| V24P | 625   |
| V24N | 6725  |
| V24M | 4140  |
| V24L | 4003  |

|      |       |
|------|-------|
| V24K | 308   |
| V24I | 916   |
| V24H | 135   |
| V24G | 546   |
| V24F | 5     |
| V24E | 475   |
| V24D | 186   |
| V24C | 2     |
| V24A | 3617  |
| R35* | 45    |
| V24* | 10796 |
| T39W | 1     |
| T39S | 95    |
| T39R | 10012 |
| T39Q | 1     |
| T39P | 203   |
| T39M | 47    |
| T39L | 2     |
| T39K | 49    |
| L23X | 1105  |
| T39I | 1     |
| L23W | 9991  |
| T39G | 6801  |
| L23V | 2440  |
| L23T | 65    |
| T39E | 4     |
| L23S | 478   |
| L23R | 3832  |
| L23Q | 247   |

|      |       |
|------|-------|
| H33Y | 51    |
| L23P | 1303  |
| T39A | 285   |
| H33X | 1     |
| H33V | 1     |
| L23M | 3803  |
| H33T | 10005 |
| L23K | 7     |
| H33S | 2     |
| M7Y  | 331   |
| H33R | 356   |
| H33Q | 91    |
| M7X  | 1600  |
| L23I | 91    |
| M7W  | 4613  |
| H33P | 321   |
| L23H | 63    |
| M7V  | 9764  |
| L23G | 6994  |
| A18X | 73    |
| L23F | 512   |
| H33N | 113   |
| M7T  | 2389  |
| L23E | 3770  |
| A18V | 34    |
| M7S  | 2765  |
| H33L | 130   |
| L23D | 5     |
| M7R  | 11193 |

|      |       |
|------|-------|
| A18T | 306   |
| H33K | 4     |
| L23C | 53    |
| M7Q  | 2276  |
| A18S | 194   |
| M7P  | 2332  |
| A18R | 6396  |
| L23A | 1266  |
| H33I | 1     |
| A18Q | 1     |
| A18P | 10115 |
| M7N  | 883   |
| M7L  | 14968 |
| A18N | 1     |
| M7K  | 1000  |
| H33D | 17    |
| A18L | 5     |
| M7I  | 5724  |
| M7H  | 368   |
| M7G  | 10770 |
| A18I | 2     |
| M7F  | 975   |
| M7E  | 2361  |
| A18G | 152   |
| M7D  | 5121  |
| M7C  | 625   |
| A18E | 6     |
| A18D | 157   |
| M7A  | 2413  |



|      |       |
|------|-------|
| A18C | 1     |
| L23* | 5552  |
| H33* | 1     |
| M7*  | 12027 |
| T36W | 6767  |
| T36S | 154   |
| T36R | 1     |
| T36P | 376   |
| T36N | 76    |
| T36M | 2     |
| T36L | 10004 |
| T36I | 27    |
| T36H | 3     |
| T36F | 1     |
| T36D | 2     |
| T36C | 1     |
| T36A | 476   |
| T36* | 3     |
| E40X | 2     |
| E40V | 35    |
| E40S | 14    |
| E40R | 9969  |
| E40Q | 10    |
| E40N | 1     |
| E40M | 1     |
| E40L | 1     |
| E40K | 51    |
| E40G | 6990  |
| E40D | 62    |

|      |       |
|------|-------|
| E40A | 66    |
| E40* | 47    |
| M1T  | 1768  |
| M1S  | 39    |
| M1R  | 43423 |
| M1K  | 6743  |
| M1I  | 10860 |
| D28Y | 122   |
| D28X | 25    |
| D28V | 983   |
| D28T | 10006 |
| D28S | 10    |
| D28R | 1     |
| D28Q | 2     |
| D28P | 6680  |
| D28N | 65    |
| D28L | 1     |
| D28K | 2     |
| D28I | 3     |
| D28H | 15    |
| D28G | 1572  |
| D28F | 8     |
| D28E | 195   |
| F44Y | 55    |
| A46V | 45    |
| F44X | 80    |
| D28C | 15    |
| A46T | 480   |
| F44V | 70    |

|      |       |
|------|-------|
| D28A | 1698  |
| A46S | 71    |
| F44S | 10021 |
| A46P | 12    |
| F44R | 1     |
| F44Q | 1     |
| A46N | 2     |
| A46L | 16864 |
| F44N | 3     |
| F44L | 164   |
| A46G | 44    |
| F44I | 49    |
| F44H | 6885  |
| F44G | 1     |
| A46D | 107   |
| F44C | 118   |
| H4Y  | 635   |
| H4X  | 1493  |
| H4W  | 488   |
| H4V  | 183   |
| H4T  | 417   |
| H4S  | 577   |
| H4R  | 3714  |
| F44* | 4     |
| H4Q  | 28009 |
| H4P  | 2020  |
| H4N  | 9810  |
| H4M  | 193   |
| H4L  | 3542  |

|      |       |
|------|-------|
| H4K  | 7321  |
| H4I  | 10003 |
| H4G  | 304   |
| H4F  | 35    |
| H4E  | 1458  |
| H4D  | 2503  |
| H4C  | 184   |
| H4A  | 90    |
| H4*  | 3348  |
| Q38X | 8     |
| Q38W | 1     |
| Q38T | 1     |
| Q38S | 6     |
| Q38R | 10054 |
| Q38P | 44    |
| Q38N | 5     |
| Q38L | 13    |
| Q38K | 102   |
| Q38I | 1     |
| Q38H | 36    |
| Q38E | 51    |
| Q38D | 6791  |
| Q38A | 1     |
| A42X | 2     |
| A42W | 1     |
| C15Y | 10383 |
| A42V | 267   |
| C15X | 238   |
| A42T | 78    |

|      |       |
|------|-------|
| C15W | 5157  |
| C15V | 13566 |
| A42S | 42    |
| A42R | 6     |
| C15T | 780   |
| C15S | 6745  |
| A42P | 8     |
| C15R | 9394  |
| C15Q | 478   |
| C15P | 5533  |
| A42L | 9973  |
| C15N | 1267  |
| C15L | 1684  |
| Q38* | 56    |
| C15K | 3366  |
| A42H | 1     |
| A42G | 46    |
| C15I | 86    |
| A42F | 1     |
| C15H | 649   |
| C15G | 18155 |
| A42D | 72    |
| C15F | 8680  |
| A42C | 6868  |
| C15E | 2738  |
| E31Y | 3     |
| C15D | 2236  |
| E31X | 18    |
| E31W | 4     |

|      |       |
|------|-------|
| E31V | 45    |
| C15A | 2268  |
| E31S | 7     |
| E31R | 9990  |
| E31Q | 8     |
| E31N | 1     |
| E31M | 1     |
| E31K | 70    |
| E31G | 6875  |
| E31D | 174   |
| T17Y | 3     |
| T17X | 93    |
| E31C | 1     |
| E31A | 129   |
| T17V | 2     |
| C15* | 5173  |
| T17S | 3286  |
| T17R | 6382  |
| T17P | 36194 |
| T17N | 43    |
| T17L | 2     |
| T17I | 47    |
| T17H | 12    |
| T17G | 5     |
| T17D | 8     |
| T17C | 7     |
| T17A | 12562 |
| E31* | 83    |
| K5Y  | 3     |

|      |       |
|------|-------|
| K5X  | 1634  |
| K5W  | 263   |
| K5V  | 409   |
| K5T  | 2455  |
| K5S  | 503   |
| K5R  | 67004 |
| K5Q  | 1174  |
| K5P  | 301   |
| K5N  | 310   |
| K5M  | 1170  |
| K5L  | 474   |
| K5I  | 15    |
| K5H  | 25    |
| K5G  | 9493  |
| K5F  | 2     |
| K5E  | 4797  |
| K5D  | 491   |
| V32Y | 1     |
| K5C  | 12    |
| K5A  | 357   |
| V32T | 1     |
| V32S | 6734  |
| V32N | 1     |
| V32M | 3     |
| V32L | 48    |
| V32I | 87    |
| K27X | 1555  |
| V32G | 163   |
| V32F | 10155 |

|      |       |
|------|-------|
| V32E | 1     |
| K27V | 1     |
| V32D | 47    |
| K27T | 168   |
| V32C | 3     |
| K27S | 5     |
| K27R | 6813  |
| V32A | 36    |
| K27Q | 113   |
| K5*  | 369   |
| K27P | 3     |
| G37X | 1     |
| G37W | 2     |
| K27N | 176   |
| G37V | 57    |
| V9Y  | 163   |
| K27M | 1     |
| V9X  | 3619  |
| G37T | 1     |
| K27L | 1     |
| G37S | 60    |
| V9W  | 24    |
| G37R | 14    |
| K27I | 38    |
| G37P | 6779  |
| V9T  | 261   |
| K27H | 1     |
| V9S  | 11973 |
| K27G | 1     |



|      |       |
|------|-------|
| V9R  | 6370  |
| V9Q  | 54    |
| K27E | 101   |
| V9P  | 7498  |
| K27D | 2     |
| G37L | 1     |
| V9N  | 380   |
| V9M  | 43    |
| V9L  | 1888  |
| V9K  | 398   |
| G37F | 1     |
| V9I  | 319   |
| G37E | 3     |
| V9H  | 657   |
| G37D | 730   |
| V9G  | 22030 |
| G37C | 52    |
| V9F  | 1821  |
| V9E  | 3590  |
| G37A | 10018 |
| V9D  | 2873  |
| V9C  | 470   |
| V9A  | 27269 |
| K27* | 34    |
| K2Y  | 49    |
| K2X  | 527   |
| K2W  | 43    |
| K2V  | 105   |

\* represents a mutation that rendered a stop mutation. X is a mutation that rendered an indel. The mutation is described following the format [wild-type residue][position][mutated residue]; the residues are specified by a one-letter code.

**Table S4. Single-residue mutations on the TM region of HokC.**

| Position | Tolerance               | Intolerance | Substitutions in the alignment |
|----------|-------------------------|-------------|--------------------------------|
| M1       | R,K,I                   |             | A,M                            |
| K2       | T,S,R,Q,N,E             | M           | M,N,T,P,S,I,K,L,Q,W            |
| Q3       | R,P,N,K,H,E             | L           | Q,R,P,S                        |
| H4       | R,Q,P,N,L,K,I,E,D       | Y           | Q,L,N,R,H,G,A                  |
| K5       | T,R,Q,P,N,M,G,E         |             | K,H,R,Q,N,S                    |
| A6       | V,S,P,G,E               | T           | V,T,P,S,C,Y,A,I                |
| M7       | V,T,R,L,I               | W,K         | M,G,R,V,I,F,A,L                |
| I8       | V,T,S,R,P,N,M,L,G,F,D,C |             | I,V,L,S                        |
| V9       | Y,S,I,G,F,D,C,A         |             | V,M,G,W,L,A,F,I                |
| A10      | V,T,S,R,P,G,F,D,C       |             | T,S,M,G,A,I,C                  |
| L11      | W,V,R,Q,M,G,F,A         | P           | L,T,V,A,I                      |
| I12      | W,V,T,R,P,N,M,L,K,G,F   | S,D,C       | G,F,I,V,L                      |
| V13      | P,L,G,F,D,A             | I           | A,M,I,V,T                      |
| I14      | Y,V,T,R,N,M,L,F,A       | S,P         | M,F,I,V,L,S                    |
| C15      | Y,W,S,R,P,G,F,E,A       |             | C                              |
| I16      | V,T,S,N,M,L,F           |             | C,F,I,A,M,V,L                  |
| T17      | S,P,I,A                 |             | T                              |
| A18      | V,T,S,P,D               | G           | I,A,M,V,L                      |
| V19      | Y,Q,P,I,F,A             | L,G         | I,L,V,P                        |
| V20      | P,M,L,G,A               |             | F,I,L,M,G,C,V,T,S              |
| A21      | W,V,S,P,G,E             | T           | F,I,A,T,L                      |
| A22      | V,R,Q,P,N,G             | T,S         | V,T,L,S,A,I                    |
| L23      | V,T,Q,P,M,I             |             | Y,L,W,F,C                      |

|     |               |         |
|-----|---------------|---------|
| V24 | Y,S,R,L,I,G,A | V,L,I,M |
|-----|---------------|---------|

Amino acid residue names are represented using the one-letter codes. Every amino acid and its position are indicated in the Position column. Mutations rendering “Wild-type Phenotype” or “Mutant Phenotype” are shown in columns labeled “Tolerance” and “Intolerance”, respectively. For instance, position V13 presents 6 mutations (for amino acids P, L, G, F, D, A) rendering a wild-type phenotype and 1 mutation (V13I) rendering a mutant phenotype. It may be noticed that all positions tolerate most substitutions (Tolerance/Intolerance > 1). The last column show the substitutions observed for every position in the multiple sequence alignment (MSA) generated with TCOFFEE (see Methods); the letters in bold in this last column mark mutations identified in our experimental mutagenesis.

**Table S5. Multiple mutations in HokC with wild type phenotype.**

| <b>Mutation</b>  | <b>Count</b> |
|------------------|--------------|
| <b>M7W,I12S</b>  | 613          |
| <b>I12S,I14S</b> | 317          |
| <b>L11P,I12S</b> | 276          |
| <b>M7W,I12C</b>  | 221          |
| <b>M7W,I14S</b>  | 220          |
| <b>M7W,L11P</b>  | 184          |
| <b>I12S,V19G</b> | 145          |
| <b>I12S,A22T</b> | 136          |
| <b>I12S,V13I</b> | 99           |
| <b>I12C,I14S</b> | 80           |
| <b>M7W,A22T</b>  | 79           |
| <b>I12S,I14P</b> | 74           |
| <b>I14S,V19G</b> | 72           |
| <b>M7W,V19G</b>  | 71           |
| <b>I12S,A22S</b> | 70           |
| <b>L11P,I14S</b> | 66           |
| <b>I12S,V19L</b> | 64           |

|                      |    |
|----------------------|----|
| <b>Q3L,I12S</b>      | 60 |
| <b>M7W,V13I</b>      | 49 |
| <b>M7W,I14P</b>      | 48 |
| <b>K2M,I12S</b>      | 44 |
| <b>I12S,A21T</b>     | 44 |
| <b>M7K,I12S</b>      | 42 |
| <b>I12C,A22T</b>     | 39 |
| <b>V13I,I14S</b>     | 38 |
| <b>I12C,V13I</b>     | 37 |
| <b>I14S,A22T</b>     | 36 |
| <b>H4Y,I12S</b>      | 36 |
| <b>M7W,A22S</b>      | 33 |
| <b>M7W,I12S,I14S</b> | 31 |
| <b>I12C,V19G</b>     | 30 |
| <b>I14S,V19L</b>     | 28 |
| <b>H4Y,M7W</b>       | 28 |
| <b>V13I,V19G</b>     | 26 |
| <b>Q3L,I12C</b>      | 26 |
| <b>M7K,I14S</b>      | 25 |
| <b>I12C,A22S</b>     | 25 |
| <b>Q3L,M7W</b>       | 24 |
| <b>A6T,I12S</b>      | 24 |
| <b>Q3L,I14S</b>      | 23 |
| <b>K2M,M7W</b>       | 23 |
| <b>V19L,A21T</b>     | 22 |
| <b>L11P,V19G</b>     | 22 |
| <b>L11P,V13I</b>     | 22 |
| <b>L11P,I14P</b>     | 22 |
| <b>I14S,A21T</b>     | 22 |
| <b>I12C,I14P</b>     | 21 |

|                      |    |
|----------------------|----|
| <b>H4Y,I12C</b>      | 21 |
| <b>K2M,V19G</b>      | 20 |
| <b>A18G,V19G</b>     | 20 |
| <b>V13I,A22T</b>     | 19 |
| <b>Q3L,V13I</b>      | 19 |
| <b>Q3L,L11P</b>      | 18 |
| <b>K2M,Q3L</b>       | 18 |
| <b>V13I,A22S</b>     | 17 |
| <b>L11P,I12C</b>     | 17 |
| <b>K2M,H4Y</b>       | 17 |
| <b>Q3L,V19L</b>      | 16 |
| <b>K2M,V19L</b>      | 16 |
| <b>I14S,A22S</b>     | 16 |
| <b>Q3L,A21T</b>      | 15 |
| <b>K2M,I14S</b>      | 15 |
| <b>K2M,I12C</b>      | 15 |
| <b>H4Y,I14S</b>      | 15 |
| <b>M7K,V19L</b>      | 14 |
| <b>M7K,V13I</b>      | 14 |
| <b>V13I,V19L</b>     | 13 |
| <b>Q3L,V19G</b>      | 13 |
| <b>M7W,V19L</b>      | 13 |
| <b>M7K,V19G</b>      | 13 |
| <b>I12C,V19L</b>     | 13 |
| <b>H4Y,V13I</b>      | 13 |
| <b>Q3L,H4Y</b>       | 11 |
| <b>M7W,I12C,I14S</b> | 11 |
| <b>H4Y,L11P</b>      | 11 |
| <b>M7W,L11P,I12S</b> | 10 |
| <b>L11P,V19L</b>     | 10 |

|                |    |
|----------------|----|
| K2M,V13I       | 10 |
| A6T,I14S       | 10 |
| V13I,A21T      | 9  |
| M7K,L11P       | 9  |
| M7K,A22T       | 9  |
| I12C,A21T      | 9  |
| H4Y,A22T       | 9  |
| M7K,I12C       | 8  |
| L11P,A22S      | 8  |
| L11P,A21T      | 8  |
| K2M,L11P       | 8  |
| I12S,I14S,V19G | 8  |
| A6T,I12C       | 8  |
| A6T,A21T       | 8  |
| V19L,A22T      | 7  |
| M7W,I12S,V13I  | 7  |
| M7W,A21T       | 7  |
| L11P,I12S,I14S | 7  |
| K2M,I14P       | 7  |
| H4Y,V19G       | 7  |
| A6T,V19G       | 7  |
| A6T,V13I       | 7  |
| Q3L,I14P       | 6  |
| Q3L,A22T       | 6  |
| Q3L,A22S       | 6  |
| M7W,I12S,A22T  | 6  |
| M7K,A21T       | 6  |
| L11P,A22T      | 6  |
| I12S,V13I,I14S | 6  |
| H4Y,M7W,I14S   | 6  |

|                |   |
|----------------|---|
| H4Y,A22S       | 6 |
| A6T,L11P       | 6 |
| V19L,A22S      | 5 |
| Q3L,M7K        | 5 |
| M7W,L11P,I14S  | 5 |
| M7W,I12C,V13I  | 5 |
| L11P,I12S,V19G | 5 |
| K2M,M7K        | 5 |
| I14P,V19G      | 5 |
| I12S,I14S,A22T | 5 |
| I12S,A18G      | 5 |
| V13I,I14P      | 4 |
| Q3L,A6T        | 4 |
| M7W,L11P,V13I  | 4 |
| M7W,I12S,I14P  | 4 |
| M7W,I12C,A22T  | 4 |
| L11P,I12S,V13I | 4 |
| K2M,I12S,I14S  | 4 |
| K2M,A22S       | 4 |
| H4Y,V19L       | 4 |
| H4Y,I14P       | 4 |
| A6T,M7W        | 4 |
| A6T,I14P       | 4 |
| A6T,A22T       | 4 |
| A6T,A22S       | 4 |
| V19G,A21T      | 3 |
| Q3L,M7W,I12C   | 3 |
| Q3L,L11P,I12S  | 3 |
| Q3L,I12S,V13I  | 3 |
| Q3L,I12S,I14S  | 3 |

|                |   |
|----------------|---|
| M7W,V13I,I14S  | 3 |
| M7W,I12S,V19G  | 3 |
| M7W,I12S,A22S  | 3 |
| M7W,I12C,V19G  | 3 |
| M7K,I14P       | 3 |
| M7K,A22S       | 3 |
| M7K,A18G,V19G  | 3 |
| K2M,M7W,I12S   | 3 |
| K2M,A22T       | 3 |
| K2M,A21T       | 3 |
| I14S,A18G      | 3 |
| I12S,V13I,A21T | 3 |
| I12S,I14S,V19L | 3 |
| I12D,V13I      | 3 |
| I12C,V13I,I14S | 3 |
| H4Y,M7W,I12S   | 3 |
| H4Y,A21T       | 3 |
| A6T,M7W,I12S   | 3 |
| A6T,I12S,I14S  | 3 |
| A21T,A22T      | 3 |
| V19G,A22S      | 2 |
| V13I,I14S,A22T | 2 |
| Q3L,V13I,I14S  | 2 |
| Q3L,M7W,I14S   | 2 |
| Q3L,M7W,I12S   | 2 |
| Q3L,L11P,V19G  | 2 |
| Q3L,I12S,V19G  | 2 |
| Q3L,A18G       | 2 |
| M7W,I14S,V19G  | 2 |
| M7W,I14S,A22T  | 2 |



|                   |   |
|-------------------|---|
| M7W,I14S,A22S     | 2 |
| M7W,I12D          | 2 |
| M7K,V13I,A21T     | 2 |
| M7K,A18G          | 2 |
| L11P,I12S,V19L    | 2 |
| K2M,M7W,L11P      | 2 |
| I14P,A22S         | 2 |
| I12D,I14S         | 2 |
| H4Y,M7K           | 2 |
| H4Y,I12S,I14S     | 2 |
| H4Y,I12S,A22T     | 2 |
| H4Y,A6T           | 2 |
| A6T,V19L          | 2 |
| A6T,M7K           | 2 |
| A6T,I12S,V13I     | 2 |
| A18G,V19L         | 2 |
| A18G,A22S         | 2 |
| V19G,A22T         | 1 |
| V13I,I14S,V19L    | 1 |
| V13I,I14S,A22S    | 1 |
| V13I,A18G         | 1 |
| Q3L,V19L,A21T     | 1 |
| Q3L,V13I,V19L     | 1 |
| Q3L,M7W,V19L      | 1 |
| Q3L,M7W,V13I      | 1 |
| Q3L,M7W,L11P      | 1 |
| Q3L,M7W,I12S,I14S | 1 |
| Q3L,M7W,A22T      | 1 |
| Q3L,M7K,L11P      | 1 |
| Q3L,M7K,I14S      | 1 |

|                    |   |
|--------------------|---|
| Q3L,M7K,I12S       | 1 |
| Q3L,L11P,V13I      | 1 |
| Q3L,I14S,A21T      | 1 |
| Q3L,I12S,A21T      | 1 |
| Q3L,I12C,V19L      | 1 |
| Q3L,I12C,V19G      | 1 |
| Q3L,H4Y,M7W,I12S   | 1 |
| Q3L,H4Y,I12C       | 1 |
| Q3L,H4Y,A22T       | 1 |
| Q3L,A6T,M7K        | 1 |
| Q3L,A6T,I12S       | 1 |
| Q3L,A6T,I12D       | 1 |
| M7W,V13I,I14P      | 1 |
| M7W,V13I,A22T      | 1 |
| M7W,L11P,V19G      | 1 |
| M7W,L11P,I14P      | 1 |
| M7W,L11P,A22T      | 1 |
| M7W,I12S,V19L      | 1 |
| M7W,I12S,V13I,A22T | 1 |
| M7W,I12S,I14S,A22T | 1 |
| M7W,I12S,A18G      | 1 |
| M7W,I12D,V19G      | 1 |
| M7W,I12C,V19L      | 1 |
| M7W,I12C,I14P      | 1 |
| M7W,I12C,A22S      | 1 |
| M7W,A21T,A22S      | 1 |
| M7K,V13I,A22S      | 1 |
| M7K,L11P,I12S      | 1 |
| M7K,I14S,V19G      | 1 |
| M7K,I12S,V19L      | 1 |

|                     |   |
|---------------------|---|
| M7K,I12S,V13I       | 1 |
| M7K,I12S,A21T       | 1 |
| M7K,I12D            | 1 |
| M7K,I12C,V13I       | 1 |
| L11P,V19L,A22S      | 1 |
| L11P,V13I,V19G      | 1 |
| L11P,V13I,I14S      | 1 |
| L11P,I14S,V19G      | 1 |
| L11P,I12S,V13I,I14S | 1 |
| L11P,I12S,I14P      | 1 |
| L11P,I12D,V13I      | 1 |
| L11P,I12D           | 1 |
| L11P,A18G,V19G      | 1 |
| K2M,V13I,A22S       | 1 |
| K2M,Q3L,V19L        | 1 |
| K2M,Q3L,I12S,V19G   | 1 |
| K2M,Q3L,H4Y,V19L    | 1 |
| K2M,Q3L,A21T        | 1 |
| K2M,M7W,V19G        | 1 |
| K2M,M7W,I14S        | 1 |
| K2M,M7W,I12C        | 1 |
| K2M,L11P,I14S       | 1 |
| K2M,L11P,I14P       | 1 |
| K2M,I14S,V19L       | 1 |
| K2M,I12S,V19L       | 1 |
| K2M,I12S,V19G       | 1 |
| K2M,I12S,I14S,V19G  | 1 |
| K2M,I12S,A21T       | 1 |
| K2M,I12D            | 1 |
| K2M,I12C,V13I       | 1 |

|                    |   |
|--------------------|---|
| K2M,I12C,I14S      | 1 |
| K2M,I12C,I14P      | 1 |
| K2M,H4Y,V19L       | 1 |
| K2M,H4Y,V19G       | 1 |
| K2M,H4Y,V13I       | 1 |
| K2M,H4Y,L11P       | 1 |
| K2M,H4Y,I12S       | 1 |
| K2M,H4Y,I12C       | 1 |
| K2M,H4Y,A21T       | 1 |
| K2M,A6T,A22T       | 1 |
| K2M,A6T            | 1 |
| I14S,V19L,A21T     | 1 |
| I14S,A18G,V19G     | 1 |
| I14P,V19L          | 1 |
| I14P,A22T          | 1 |
| I12S,V19L,A22T     | 1 |
| I12S,V19L,A21T     | 1 |
| I12S,V13I,A22S     | 1 |
| I12S,I14S,A22S     | 1 |
| I12S,A18G,V19G     | 1 |
| I12D,V19L          | 1 |
| I12D,V19G          | 1 |
| I12D,I14P          | 1 |
| I12D,A22T          | 1 |
| I12D,A21T          | 1 |
| I12C,I14P,V19G     | 1 |
| H4Y,V13I,A22S      | 1 |
| H4Y,M7W,L11P       | 1 |
| H4Y,L11P,I14S      | 1 |
| H4Y,L11P,I12S,V19G | 1 |

|                    |   |
|--------------------|---|
| H4Y,L11P,I12D,V13I | 1 |
| H4Y,I12S,V19G      | 1 |
| H4Y,I12S,V13I      | 1 |
| H4Y,A6T,V13I       | 1 |
| A6T,V13I,A22T      | 1 |
| A6T,V13I,A22S      | 1 |
| A6T,L11P,V13I      | 1 |
| A6T,L11P,I14S      | 1 |
| A6T,L11P,I12S      | 1 |
| A6T,I12S,I14S,V19G | 1 |
| A6T,I12S,I14P      | 1 |
| A6T,I12S,A22S      | 1 |
| A6T,I12S,A21T      | 1 |
| A6T,I12D,V13I      | 1 |
| A6T,I12C,A22S      | 1 |
| A6T,A18G           | 1 |
| A18G,A21T          | 1 |

**Table S6. Occurrence of deleterious single-point mutations in compensatory mutations.**

| <b>Intolerated single-point mutation</b> | <b>Occurrence</b> |
|------------------------------------------|-------------------|
| K2M                                      | 46                |
| Q3L                                      | 51                |
| H4Y                                      | 39                |
| A6T                                      | 36                |
| M7K                                      | 30                |
| M7W                                      | 65                |
| L11P                                     | 52                |
| I12C                                     | 35                |

|             |    |
|-------------|----|
| <b>I12D</b> | 16 |
| <b>I12S</b> | 79 |
| <b>V13I</b> | 58 |
| <b>I14P</b> | 24 |
| <b>I14S</b> | 59 |
| <b>A18G</b> | 15 |
| <b>V19G</b> | 43 |
| <b>V19L</b> | 36 |
| <b>A21T</b> | 29 |
| <b>A22T</b> | 31 |
| <b>A22S</b> | 29 |

The value Occurrence reports the number of multiple compensatory mutations that presented the particular single-point mutation reported in column labeled “Intolerated single-point mutation”.

**Table S7. Multiple sequence alignment of 148 protein sequences from PF01848 family obtained with TM-COFFEE.**

| IN           | HEL              | OUT                       |
|--------------|------------------|---------------------------|
| HOKC_ECOLI   | -----            | MK                        |
| F3VWM0_SHIBO | -----            | MS                        |
| H5R5N6_ECOLX | -----            | ML                        |
| C6UVK1_ECO5T | -----            | ML                        |
| HOKF_ECO57   | M-----           | L                         |
| H4V506_ECOLX | M-----           | L                         |
| E2QGR9_ECOLX | -----            | MP                        |
| D6J7Q5_ECOLX | -----            | ML                        |
| F4TJV8_ECOLX | M-----           | L                         |
| G0F2P1_ECOLX | -----            | MP                        |
| G1Z0S1_ECOLX | M-----           | L                         |
| G1YEQ3_ECOLX | M-----           | L                         |
| F9CTD1_ECOLX | -----            | MS                        |
| H4IYN1_ECOLX | -----            | MP                        |
| F5NNJ6_SHIFL | -----            | MP                        |
| E1J5E3_ECOLX | -----            | ML                        |
| B7N6Z5_ECOLU | M-----           | L                         |
| H1FMW9_ECOLX | -----            | ML                        |
| F9CSC2_ECOLX | -----            | AM                        |
| H8D654_ECOLX | -----            | ML                        |
| E9TXJ2_ECOLX | -----            | ML                        |
| H5J5L9_ECOLX | M-----           | L                         |
| H5NSR7_ECOLX | -----            | MS                        |
| E2X956_SHIDY | -----            | ML                        |
| D8E1P5_ECOLX | M-----           | L                         |
| H5PSJ3_ECOLX | -----            | MP                        |
| D2AAD3_SHIF2 | -----            | MP                        |
| H1DN41_ECOLX | MKPQDDISINF----- | GAATPNQTIWMVVPSSSHGGNINML |
| E9VJD7_ECOLX | -----            | ML                        |
| E9TYV6_ECOLX | -----            | MQ                        |

|        |       |                                                    |                    |
|--------|-------|----------------------------------------------------|--------------------|
| F4UN92 | ECOLX | -----                                              | MKYLNTTDCSLFLAERSK |
| F8XK11 | ECOLX | -----                                              | ML                 |
| G1ZVT9 | ECOLX | -----                                              | ML                 |
| E9Y7R9 | ECOLX | -----                                              | M                  |
| H4LZX6 | ECOLX | -----                                              | MP                 |
| D6HWC9 | ECOLX | -----                                              | ML                 |
| E2KHD1 | ECO57 | -----                                              | ML                 |
| F9S7G0 | 9VIBR | -----                                              | MP                 |
| G5W2A4 | ECOLX | -----                                              | MS                 |
| E8HUC2 | ECOLX | -----                                              | MK                 |
| HOKD   | ECO57 | -----                                              | MK                 |
| B2U569 | SHIB3 | -----                                              | MP                 |
| H9YDF6 | ECOKO | -----                                              | MP                 |
| E1IYD1 | ECOLX | -----                                              | MK                 |
| G2FAK9 | ECOLX | -----                                              | ML                 |
| E9XTT2 | ECOLX | -----                                              | MW                 |
| E8II98 | ECOLX | MPEAFRFQVYSEVWKDEAPGDISINPGAATPNQTIWMVVPSSHGGNINML |                    |
| G5Y5U9 | ECOLX | -----                                              | ML                 |
| B3HJT0 | ECOLX | -----                                              | ML                 |
| E9U427 | ECOLX | -----                                              | ML                 |
| D8E8Z0 | ECOLX | MKPQEIFLSIL-----GLPLRASTTRMVVPSSHGGNINML           |                    |
| G2S0L6 | ENTAL | -----                                              | MT                 |
| H5JJ49 | ECOLX | -----                                              | MS                 |
| E1PB25 | ECOAB | MVV-----PSSHGGNINML                                |                    |
| H5GVQ2 | ECOLX | M-----                                             | L                  |
| E7HA11 | ECOLX | -----                                              | MP                 |
| G8XCJ0 | KLEPN | -----                                              | MK                 |
| H4JR53 | ECOLX | M-----                                             | L                  |
| G5XXC8 | ECOLX | -----                                              | MS                 |
| Q3Z5Z9 | SHISS | -----                                              | ML                 |
| E0IZ09 | ECOLW | -----                                              | ML                 |
| G5KK22 | ECOLX | -----                                              | ML                 |
| H6MBN5 | ECOLX | -----                                              | MK                 |
| D5CWF7 | ECOKI | -----                                              | ML                 |
| B2TD6  | SHIB3 | MKPQEIFLSIL-----GLPLRASTTRMVVPSSHGGNINML           |                    |
| D3H5D3 | ECO44 | -----                                              | MK                 |
| D6J6E3 | ECOLX | -----                                              | ML                 |
| F5VK79 | ENTSA | -----                                              | MK                 |
| B6ZP83 | ECO57 | M-----                                             | L                  |
| B3I927 | ECOLX | M-----                                             | L                  |
| H5FWT6 | ECOLX | -----                                              | MS                 |
| H5BXU3 | ECOLX | -----                                              | MP                 |
| G5W9P6 | ECOLX | M-----                                             | L                  |
| D6IMK6 | ECOLX | -----                                              | MK                 |
| H4Q809 | ECOLX | -----                                              | MP                 |
| E5B936 | ERWAM | -----                                              | MK                 |
| D8C2A4 | ECOLX | -----                                              | MP                 |
| F9HSF5 | ECOLX | -----                                              |                    |
| E8YBF8 | ECOKO | -----                                              | MK                 |
| H6MHP8 | ECOLX | M-----                                             | L                  |
| F4VXG3 | ECOLX | -----                                              | MN                 |
| E1IRH6 | ECOLX | -----                                              | ML                 |
| H5NFB4 | ECOLX | -----                                              | MP                 |
| H7CRD5 | ECO57 | -----                                              | MK                 |
| F1XMB4 | ECO57 | -----                                              | MP                 |
| E8I9N6 | ECOLX | -----                                              | MK                 |
| C8TWH1 | ECO26 | -----                                              | MKYLNTTDCSLFLAERSK |
| E1IQK3 | ECOLX | M-----                                             | L                  |
| B2NP37 | ECO57 | -----                                              | MP                 |
| D6GL38 | 9ENTR | MHEHHKSS-----LLLVENQHWRRGMP                        |                    |
| G5TUD2 | ECOLX | -----                                              | ML                 |
| E7TAB1 | SHIFL | -----                                              | M                  |
| E9Y8K4 | ECOLX | -----                                              | MI                 |
| H1F377 | ECOLX | -----                                              | ML                 |
| F8XED9 | ECOLX | -----                                              | MP                 |
| F7MUV5 | ECOLX | -----                                              | MS                 |
| H4NJR3 | ECOLX | -----                                              | MP                 |
| H4KT12 | ECOLX | -----                                              | MK                 |
| H1FAP9 | ECOLX | -----                                              | ML                 |
| F9CEP4 | ECOLX | -----                                              | ML                 |
| B2U6D2 | ECOLX | -----                                              | MK                 |
| B6ZRV0 | ECO57 | -----                                              | MP                 |
| B3X849 | ECOLX | -----                                              | MP                 |
| E1IOA5 | ECOLX | -----                                              | MK                 |
| H5A0H9 | ECOLX | M-----                                             | L                  |
| G5X3P4 | ECOLX | -----                                              | ML                 |
| H5KI64 | ECOLX | M-----                                             | L                  |

|        |       |                                          |       |
|--------|-------|------------------------------------------|-------|
| G5WI34 | ECOLX | -----                                    | MM    |
| F3Q9V6 | 9ENTR | -----                                    | ----- |
| D8B2D1 | ECOLX | -----                                    | MN    |
| E9VCC9 | ECOLX | -----                                    | MK    |
| H5AV32 | ECOLX | -----                                    | MS    |
| F3V7U1 | SHIDY | -----                                    | MS    |
| E9Y8K6 | ECOLX | MGL-----PLQTRTIWMVVPSSHGGNINML           | ----- |
| H4YAG3 | ECOLX | -----                                    | ----- |
| E1IRH4 | ECOLX | MKPQEIFLSII-----GLPLRASTTRMVVPSSHGGNINML | ----- |
| G5UXX9 | ECOLX | MPEHHKVS-----LLLVGNQHRGLGMP              | ----- |
| C6UR89 | ECO5T | -----                                    | ML    |
| Q0H0B2 | ECOLX | -----                                    | M     |
| C8SY02 | KLEPR | -----                                    | ML    |
| H5H178 | ECOLX | -----                                    | MK    |
| C8TPL3 | ECO26 | -----                                    | ML    |
| H9YME7 | ECOKO | -----                                    | ML    |
| G5XGE5 | ECOLX | M-----L                                  | L     |
| Q8Z607 | SALTI | -----                                    | MK    |
| I0QXL4 | 9ENTR | -----                                    | MP    |
| G5WKB9 | ECOLX | MPEHHKVS-----LLLVGNQHRGLGMP              | ----- |
| F4UZC8 | ECOLX | MKPQDDISINP-----GAATPNQTIWMVVPSSHGGNINML | ----- |
| H3M9M9 | KLEOX | MNLNNSDV-----SLFF-----AGRQDML            | ----- |
| B3H9D0 | ECOLX | -----                                    | MS    |
| F1XSU4 | ECO57 | M-----L                                  | L     |
| D3RCX9 | KLEVT | -----                                    | MP    |
| H4FPV2 | ECOLX | -----                                    | ML    |
| F9CJU5 | ECOLX | -----                                    | MS    |
| H5JUR0 | ECOLX | -----                                    | ML    |
| H5AS66 | ECOLX | -----                                    | MP    |
| C8UQU5 | ECO1A | -----                                    | ML    |
| G5X8B3 | ECOLX | -----                                    | MS    |
| H4MLQ7 | ECOLX | M-----L                                  | L     |
| E7JA92 | ECOLX | MPEHHKVS-----LLLVGNQHRGLGMP              | ----- |
| G0GSM6 | KLEPN | M-----L                                  | L     |
| G9RE52 | 9ENTR | M-----L                                  | L     |
| H5CWM5 | ECOLX | -----                                    | MK    |
| G7RV84 | KLEPN | -----                                    | MK    |
| HOKC   | SHIFL | -----                                    | MK    |
| B3AGC6 | ECO57 | -----                                    | MP    |
| H8WUZ6 | SALTS | -----                                    | ----- |
| B5R4Z4 | SALEP | -----                                    | ML    |
| E8H236 | ECO57 | -----                                    | MK    |
| G2AM71 | ECOLX | -----                                    | MP    |

|        |       |                                 |       |
|--------|-------|---------------------------------|-------|
| HOKC   | ECOLI | -----                           | QHKA  |
| F3VVM0 | SHIBO | -----                           | Q-KS  |
| H5R5N6 | ECOLX | -T-----                         | -KY   |
| C6UVK1 | ECO5T | -NTC-----R-VPLTDRKVKEKRAMK-QHKV | ----- |
| HOKF   | ECO57 | -T-----                         | -KY   |
| H4V506 | ECOLX | -T-----                         | -KY   |
| E2QGR9 | ECOLX | -Q-----                         | -KY   |
| D6J7Q5 | ECOLX | -T-----                         | -KY   |
| F4TJV8 | ECOLX | -T-----                         | -KY   |
| G0F2P1 | ECOLX | -Q-----                         | -KY   |
| G1Z0S1 | ECOLX | -T-----                         | -KY   |
| G1YEQ3 | ECOLX | -T-----                         | -KY   |
| F9CTD1 | ECOLX | -----                           | Q-KS  |
| H4IYN1 | ECOLX | -Q-----                         | -KY   |
| F5NNJ6 | SHIFL | -Q-----                         | -KY   |
| E1J5E3 | ECOLX | -NTC-----R-VPLTDRKVKEKRAMK-QHKA | ----- |
| B7N6Z5 | ECOLU | -T-----                         | -KY   |
| H1FMW9 | ECOLX | -T-----                         | -KY   |
| F9CSC2 | ECOLX | -----                           | SQKS  |
| H8D654 | ECOLX | -T-----                         | -KY   |
| E9TXJ2 | ECOLX | -HKRR-----LASYPEKGEKQAMK-QQKA   | ----- |
| H5J5L9 | ECOLX | -T-----                         | -KY   |
| H5NSR7 | ECOLX | -----                           | Q-KS  |
| E2X956 | SHIDY | -T-----                         | -KY   |
| D8E1P5 | ECOLX | -T-----                         | -KY   |
| H5PSJ3 | ECOLX | -Q-----                         | -KY   |
| D2AAD3 | SHIF2 | -Q-----                         | -KY   |
| H1DN41 | ECOLX | -T-----                         | -KY   |
| E9VJD7 | ECOLX | -T-----                         | -KY   |
| E9TVV6 | ECOLX | -NTC-----R-VPLTDRKVKEKRAMK-QHKA | ----- |
| F4UN92 | ECOLX | FMT-----                        | -KY   |



|               |                           |                                  |      |
|---------------|---------------------------|----------------------------------|------|
| F8XK11_ECOLX  | --YTRR--                  | LASYVPGKGEKQAMK-QQKA             | ---- |
| G1ZVT9_ECOLX  | -T-                       | -KY                              | ---- |
| E9Y7R9_ECOLX  | -----                     | PQRT                             | ---- |
| H4LZX6_ECOLX  | -Q-                       | -KY                              | ---- |
| D6HWC9_ECOLX  | -CTCR-                    | LASYAPEGKEKQAMK-QQKA             | ---- |
| E2KHD1_ECO57  | -T-                       | -KY                              | ---- |
| F9S7G0_9VIBR  | -----                     | RNKT                             | ---- |
| G5W2A4_ECOLX  | -HKCR-                    | LASYVPGKGKQAMK-QQKA              | ---- |
| E8HUC2_ECOLX  | -----                     | QHKV                             | ---- |
| HOKD_ECO57    | -----                     | QQKA                             | ---- |
| B2U569_SHIB3  | -Q-                       | -KY                              | ---- |
| H9YDF6_ECOKO  | -Q-                       | -KY                              | ---- |
| E1IYD1_ECOLX  | -----                     | HNP                              | ---- |
| G2FAK9_ECOLX  | -NTC-                     | -R-VPLTDRKVKEKRAMK-QHKA          | ---- |
| E9XTT2_ECOLX  | -QDKSPVVNFSLTHEAPACLDNIR- | IASYRALRKEKKAMKLPSS              | ---- |
| E8II98_ECOLX  | -T-                       | -KY                              | ---- |
| G5Y5U9_ECOLX  | -NTC-                     | -R-VPLTDRKVKEKRAMK-QHKA          | ---- |
| B3HJT0_ECOLX  | -T-                       | -KY                              | ---- |
| E9U427_ECOLX  | -T-                       | -KY                              | ---- |
| D8E8Z0_ECOLX  | -T-                       | -KY                              | ---- |
| G2S0L6_ENTAL  | -----                     | PLKT                             | ---- |
| H5JJ49_ECOLX  | -----                     | Q-KS                             | ---- |
| E1PB25_ECOAB  | -T-                       | -KY                              | ---- |
| H5GVQ2_ECOLX  | -T-                       | -KY                              | ---- |
| E7HA11_ECOLX  | -----                     | Q-KT                             | ---- |
| G8XCJ0_KLEPN  | -----                     | LPRNT                            | ---- |
| H4JR53_ECOLX  | -T-                       | -KY                              | ---- |
| G5XXC8_ECOLX  | -----                     | Q-KS                             | ---- |
| Q3Z5Z9_SHISS  | -NTC-                     | -R-VPLTDRKVKEKRAMK-QHKA          | ---- |
| E0IZ09_ECOLW  | -NTC-                     | -R-VPLTDRKVKEKRAMK-QHKA          | ---- |
| G5KK22_ECOLX  | -T-                       | -KY                              | ---- |
| H6MBN5_ECOLX  | -----                     | QQKA                             | ---- |
| D5CWF7_ECOKI  | -T-                       | -KY                              | ---- |
| B2TTD6_SHIB3  | -T-                       | -KY                              | ---- |
| D3H5D3_ECO44  | -L-                       | PGNA                             | ---- |
| D6J6E3_ECOLX  | -NTC-                     | -R-VPLTDRKVKEKRAMK-QHKA          | ---- |
| F5VK79_ENTSA  | -----                     | PLHY                             | ---- |
| B6ZP83_ECO57  | -T-                       | -KY                              | ---- |
| B3I927_ECOLX  | -T-                       | -KY                              | ---- |
| H5FWT6_ECOLX  | -----                     | Q-KS                             | ---- |
| H5BXU3_ECOLX  | -Q-                       | -KY                              | ---- |
| G5W9P6_ECOLX  | -T-                       | -KY                              | ---- |
| D6IMK6_ECOLX  | -----                     | QQKA                             | ---- |
| H4Q809_ECOLX  | -Q-                       | -KY                              | ---- |
| E5B936_ERWAM  | -----                     | LPANC                            | ---- |
| D8C2A4_ECOLX  | -Q-                       | -KY                              | ---- |
| F9HSF5_ECOLX  | -----                     | -----                            | ---- |
| E8YBF8_ECOKO  | -Q-                       | QKA                              | ---- |
| H6MHP8_ECOLX  | -T-                       | -KY                              | ---- |
| F4VXG3_ECOLX  | -GKSR-                    | LASYVPGKGEKQAMK-QQKA             | ---- |
| E1IRH6_ECOLX  | -T-                       | -KY                              | ---- |
| H5NFFV4_ECOLX | -Q-                       | -KY                              | ---- |
| H7CRD5_ECO57  | -----                     | LPRSS                            | ---- |
| F1XMB4_ECO57  | -----                     | Q-KT                             | ---- |
| E8I9N6_ECOLX  | -----                     | QQKA                             | ---- |
| C8TWH1_ECO26  | FMT                       | -KY                              | ---- |
| E1IQK3_ECOLX  | -T-                       | -KY                              | ---- |
| B2NP37_ECO57  | -----                     | Q-KT                             | ---- |
| D6GL38_9ENTR  | -Q-                       | -KY                              | ---- |
| G5TUD2_ECOLX  | -T-                       | -KY                              | ---- |
| E7TAB1_SHIFL  | -----                     | K-QHKA                           | ---- |
| E9Y8K4_ECOLX  | -FYYQ-                    | PEAPYMLNTCR-VPLTDRKVKEKRAMK-QHKA | ---- |
| H1F377_ECOLX  | -NTC-                     | -R-VPLTDRKVKEKRAMK-QHKA          | ---- |
| F8XED9_ECOLX  | -Q-                       | -KY                              | ---- |
| F7MUV5_ECOLX  | -----                     | Q-KS                             | ---- |
| H4NJR3_ECOLX  | -----                     | Q-KT                             | ---- |
| H4KT12_ECOLX  | -----                     | QHKA                             | ---- |
| H1FAP9_ECOLX  | -DTCR-                    | LASYVPGKGEKQAMK-QQKA             | ---- |
| F9CEP4_ECOLX  | -T-                       | -KY                              | ---- |
| B2U6D2_ECOLX  | -L-                       | PGNA                             | ---- |
| B6ZRV0_ECO57  | -Q-                       | -KY                              | ---- |
| B3X849_ECOLX  | -Q-                       | -KY                              | ---- |
| E1IOA5_ECOLX  | -----                     | HNP                              | ---- |
| H5A0H9_ECOLX  | -T-                       | -KY                              | ---- |
| G5X3P4_ECOLX  | -NTC-                     | -R-VPLTDRKVKEKRAMK-QHKA          | ---- |
| H5KI64_ECOLX  | -T-                       | -KY                              | ---- |
| G5WI34_ECOLX  | -----                     | PQRT                             | ---- |

|              |              |                         |
|--------------|--------------|-------------------------|
| F3Q9V6_9ENTR | -----        | -----                   |
| D8B2D1_ECOLX | --GKSR--     | LASYVPKGKEKQAMK-QQKA    |
| E9VCC9_ECOLX | -----        | QHKA                    |
| H5AV32_ECOLX | -----        | Q-KS                    |
| F3V7U1_SHIDY | -----        | Q-KS                    |
| E9Y8K6_ECOLX | -T-          | KY                      |
| H4YAG3_ECOLX | -----        | -----                   |
| E1IRH4_ECOLX | -T-          | KY                      |
| G5UXX9_ECOLX | Q            | KY                      |
| C6UR89_ECO5T | -DTCR--      | LASYAPKGKEKQAMK-QQKA    |
| Q0H0B2_ECOLX | -T-          | KY                      |
| C8SY02_KLEPR | -HQHQVTPLLT- | LRYLQYLCELTQEKKAMKLPRNA |
| H5H178_ECOLX | -----        | QHKA                    |
| C8TPL3_ECO26 | -HKRR--      | LASYAPKGKEKQVMK-QQKA    |
| H9YME7_ECOKO | -T-          | KY                      |
| G5XGE5_ECOLX | -T-          | KY                      |
| Q8Z607_SALTI | Q            | QKA                     |
| I0QXL4_9ENTR | -T-          | NIKVAPHLKRGKHAMNSLM     |
| G5WKB9_ECOLX | Q            | KY                      |
| F4UZC8_ECOLX | -T-          | KY                      |
| H3M9M9_KLEOX | -T-          | KY                      |
| B3H9D0_ECOLX | -----        | Q-KS                    |
| F1XSU4_ECO57 | -T-          | KY                      |
| D3RCX9_KLEVT | Q            | KY                      |
| H4FPV2_ECOLX | -NTC-        | R-VPLTDRKVKEKRAMK-QHKA  |
| F9CJU5_ECOLX | -----        | Q-KS                    |
| H5JUR0_ECOLX | -T-          | KY                      |
| H5AS66_ECOLX | -----        | Q-KT                    |
| C8UQU5_ECO1A | -VTFRVA-     | SYPLKCKEKKAMKLPNQP      |
| G5X8B3_ECOLX | -----        | Q-KS                    |
| H4MLQ7_ECOLX | -T-          | KY                      |
| E7JA92_ECOLX | Q            | KY                      |
| G0GSM6_KLEPN | -T-          | KY                      |
| G9RE52_9ENTR | -T-          | KY                      |
| H5CWM5_ECOLX | -----        | QHKA                    |
| G7RV84_KLEPN | -----        | LPRNT                   |
| HOKC_SHIFL   | -----        | QHKA                    |
| B3AGC6_ECO57 | Q            | KY                      |
| H8WUZ6_SALTS | -----        | -----                   |
| B5R4Z4_SALEP | -CTCR--      | LASYVPKGKEKQAMK-QQKA    |
| E8H236_ECO57 | -----        | QHKV                    |
| G2AM71_ECOLX | Q            | KY                      |

|              |                                                  |
|--------------|--------------------------------------------------|
| HOKC_ECOLI   | -MIVALIVICITAVVAALVTRKDLCEVHIRTGQTEVAVFTAYES--E- |
| F3VWM0_SHIBO | -L--TAITFCVTAILIIWMLHGSLCEIRMSFWGAEFAAFLQCK---Q- |
| H5R5N6_ECOLX | -ALAAVIVLCLTVLGFTLLVGDSLCEFTVKERNIEFKVVLAYEPK    |
| C6UVK1_ECO5T | -MIVALIVICITAVVAALVTRKDLCEVHIRTGQTEVAVFTAYES--E- |
| HOKF_ECO57   | -ALVAVIVLCLTVPGFTLLVGDSLCEFTVKERNIEFRAVLAYEPK    |
| H4V506_ECOLX | -ALVAVIVLCLTVLGFTLLVGDSLCELSIRERGMEFKAVLAYESK    |
| E2QGR9_ECOLX | -RLLSLIVICFTLLFFTWMIRDSDLCELHIKQESYELAAFLACKLKE  |
| D6J7Q5_ECOLX | -ALAAVIVLCLTVLGFTLLVGDSLCEFTVKERNIEFKAVLAYEPK    |
| F4TJV8_ECOLX | -ALVAVIVLCLTVLGFTLLVGDSLCELSIRERGMEFKAVLAYESK    |
| G0F2P1_ECOLX | -RLLSLIVICFTLLFFTWMIRDSDLCELHIKQESYELAAFLACKLKE  |
| G120S1_ECOLX | -ALAAVIVLCLTVLGFTLLVGDSLCEFTVKERNIEFKAVLAYEPK    |
| G1YEQ3_ECOLX | -ALVAVIVLCLTVLGFTLLVGDSLCELSIRERGMEFKAVLAYESK    |
| F9CTD1_ECOLX | -L--ITVTICMTVIFTIWMMLHGSLCEFRNLWGAEFAAFLQCK---Q- |
| H4IYN1_ECOLX | -RLLSLIVICFTLLFFTWMIRDSDLCELHIKQESYELAAFLACKLKE  |
| F5NNJ6_SHIFL | -RLLSLIVICFTLLFFTWMIRDSDLCELHIKQESYELAAFLAYKLKE  |
| E1J5E3_ECOLX | -MIVALIVICITAVVAALVTRKDLCEVHIRTGQTEVAVFTAYES--E- |
| B7N6Z5_ECOLU | -ALVAVIVLCLTVLGFTLLVGDSLCELSIRERGMEFKAVLAYESK    |
| H1FMW9_ECOLX | -ALVAVIVLCLTVLGFTLLVGDSLCEFTVKERNIEFKAVLAYEPK    |
| F9CSC2_ECOLX | -L--TAIMFCVTVILIIWMLHGSLCEIRMSFWGAEFAAFLQCK---Q- |
| H8D654_ECOLX | -ALVAVIVLCLTVLGFTLLVGDSLCEFTVKERNIEFKAVLAYEPK    |
| E9TXJ2_ECOLX | -MLIALIVICLTVIVTALVTRKDLCEVRIRITGQTEVAVFTA       |
| H5J5L9_ECOLX | -ALVAVIVLCLTVLGFTLLVGDSLCELSIRERGMEFKAVLAYESK    |
| H5NSR7_ECOLX | -L--TAITSCVTAILIIWMLHGSLCEIRMSFWGAEFAAFLQCK---Q- |
| E2X956_SHIDY | -ALVAVIVLCLTVLGFTLLVGDSLCEFTVKERNIEFKAVLTYPK     |
| D8E1P5_ECOLX | -ALVAVIVLCLTVLGFTLLVGDSLCELSIRERGMEFKAVLAYESK    |
| H5PSJ3_ECOLX | -RLLSLIVICFTLLFFTWMIRDSDLCELHIKQESYELAAFLACNLK   |
| D2AAD3_SHIF2 | -RLLSLIVICFTLLFFTWMIRDSDLCELHIKQESYELAAFLAYKLKE  |
| H1DN41_ECOLX | -ALVAVIVLCLTVLGFTLLVGDSLCEFTVKERNIEFKAVLAYEPK    |
| E9VJD7_ECOLX | -ALVAVIVLCLTVLGFTLLVGDSLCEFTVKERNIEFKAVLAYEPK    |
| E9TYV6_ECOLX | -MIVALIVICITAVVAALVTRKDLCEVHIRTGQTEVAVFTAYES--E- |
| F4UN92_ECOLX | -ALIGLLAVCATVLCFLLIIFRERLCELNIHRGNTVQVTLAYEAR    |
| F8XK11_ECOLX | -MLIALIVICLTVIVTALVTRKDLCEVRIRIGQTEVAVFTAYEPE-E- |

G1ZVT9\_ECOLX -ALVAVIVLCLTVLGFTLLVGDSLCEFTVKERNIEFKAVLAYEPK-----  
 E9Y7R9\_ECOLX -FLMLLIVICVTILCFVWMVRDLSLGLRLQGGNTVLVATLAYEVK--R-----  
 H4LXZ6\_ECOLX -RLLSLIVICFTLLFFFTWMIRDLSLCELHIKQGSYELAAFLACNLK-----  
 D6HWC9\_ECOLX -MLIALIVICLTVIMTALVTRKDLCEVRI RTGQTEVAVFTAYES--E-----  
 E2KHD1\_ECO57 -ALVAVIVLCLTVLGFTLLVGDSLCEFTVKERNIEFKAVLAYEPK-----  
 F9S7G0\_9VIBR -ALLGLIVICLTVLCTFTWMTRGTLCELHFKDGNVVISATLAYES--R-----  
 G5W2A4\_ECOLX -MLVAVIVLCLTVIVTALVTRKDLCEVRLRTGQTEVAVFTAYEPE--E-----  
 E8HUC2\_ECOLX -MIVALIVICITAVVAALVTRKDLCEVHIRTGQTEVAVFTAYES--E-----  
 HOKD\_ECO57 -MLIALIVICLTVIVTALVTRKDLCEVRI RTGQTEVAVFTAYEPE--E-----  
 B2U569\_SHIB3 -GLLSLIVICFTLLFFFTWMVRDLSLCELHIKQGSYELAAFLACNLK-----  
 H9YDF6\_ECOKO -RLLSLIVICFTLLFFFTWMIRDLSLCELHIKQGSYELAAFLACNLKELESSAGSYSRLSYGVAHSH-  
 E1IYD1\_ECOLX -LVVCLLIICITILFTLLTRQTLVELRFRDGDKEVAALMACTS--R-----  
 G2FAK9\_ECOLX -MIVALIVICITAVVAALVTRKDLCEVHIRTGQTEVAVFTAYES--E-----  
 E9XTT2\_ECOLX -LVWCVLIVCLTLLIFTYLRKSLCEIRYRDGHREVA AFMAYESG--K-----  
 E8I198\_ECOLX -ALVAVIVLCLTVPGFTLLVGDSLCEFTVKERNIEFRAVLAYEPK-----  
 G5Y5U9\_ECOLX -MIVALIVICITAVVAALVTRKDLCEVHIRTGQTEVAVFTAYES--E-----  
 B3HJT0\_ECOLX -ALVAVIVLCLTVLGFTLLVGDSLCEFTVKERNIEFKAVLAYEPK-----  
 E9U427\_ECOLX -ALVAVIVLCLTVLGFTLLVGDSLCEFTVKERNIEFKAVLAYEPK-----  
 D8E8Z0\_ECOLX -ALVAVIVLCLTVLGFTLLVGDSLCEFTVKERNIEFKAVLAYEPK-----  
 G2S0L6\_ENTAL -VSGIVFIICLTVIFTFINRGRCLCELTIKSEHQEVA AKLA CLA--G-----  
 H5JJ49\_ECOLX -L--TAITFCVTVILIIWMLHGSLCEIRMSFWGA EF AAFLOCK---Q-----  
 E1PB25\_ECOAB -ALVAVIVLCLTVLGFTLLVGDSLCEFTVKERNIEFKAVLAYEPK-----  
 H5GQ22\_ECOLX -ALVAIVLCTVGLFTLMVGDSLCELSIRERGM EF KAVLAYESK-----  
 E7HA11\_ECOLX -I--IVGMLCLTMLLT VVWLHASPCEFRVSFMWSEIAAFLQCK---P-----  
 G8XCJ0\_KLEPN -LLGCVLIVCLTLLIFTYLRKSLCEIRYRDTNREVA AF LAYESA--K-----  
 H4JR53\_ECOLX -ALVAIVLCTVGLFTLMVGDSLCELSIRERGM EF KAVLAYESK-----  
 G5XXC8\_ECOLX -L--TAITFCVTAILIIWMLHGSLCEIRMSFWGA EF AAFLOCK---Q-----  
 Q3Z5Z9\_SHISS -MIVALIVICITAVVAALVTRKDLCEVHIRTGQTEVAVFTAYES--E-----  
 E0I209\_ECOLW -MIVALIVICITAVVAALVTRKDLCEVHIRTGQTEVAVFTAYES--E-----  
 G5KK22\_ECOLX -ALVAVIVLCLTVLGFTLLVGDSLCEFTVKERNIEFKAVLAYEPK-----  
 H6MBN5\_ECOLX -MLIALIVICLTVIVTALVTRKDLCEVRI RTGQTEVAVFTAYEPE--E-----  
 D5CWF7\_ECOKI -ALVAVIVLCLTVLGFTLLVGDSLCEFTVKERNIEFKAVLAYEPK-----  
 B2TTD6\_SHIB3 -ALAAVIVLCLTVLGFTLLVGDSLCEFTVKERNIEFKAVLAYEPK-----  
 D3H5D3\_ECO44 -LIWCVLIVCCTLLIFTFLTRNRLCEVRLKDGYREV TATMAYESGGK-----  
 D6J6R3\_ECOLX -MIVALIVICITAVVAALVTRKDLCEVHIRTGQTEVAVFTAYES--E-----  
 F5VK79\_ENTSA -LLACLFMVCVTILIFALMNQGTLCHE TIRSGSQEVA AKLACTG--K-----  
 B6ZP83\_ECO57 -ALVAVIVLCLTVPGFTLLVGDSLCEFTVKERNIEFRAVLAYEPK-----  
 B3I927\_ECOLX -ALVAIVLCTVGLFTLMVGDSLCELSIRERGM EF KAVLAYESK-----  
 H5FWT6\_ECOLX -L--TAITFCVTAILIIWMLHGSLCEIRMSFWGA EF AAFLOCK---Q-----  
 H5BXU3\_ECOLX -RLLSLIVICFTLLFFFTWMIRDLSLCELHIKQGSYELAAFLACNLK-----  
 G5W9P6\_ECOLX -ALVAIVLCTVGLFTLMVGDSLCELSIRERGM EF KAVLAYESK-----  
 D6IMK6\_ECOLX -MLIALIVICLTVIVTALVTRKDLCEVRI RTGQTEVAVFTAYEPE--E-----  
 H4Q809\_ECOLX -RLLSLIVICFTLLFFFTWMIRDLSLCELHIKQGSYELAAFLACNLK-----  
 E5B936\_ERWAM -LIWCVLIVCCTLLIFTYLRKSLCEIRYKDG YREVA AFMAYESG--K-----  
 D8C2A4\_ECOLX -RLLSLIVICFTLLFFFTWMIRDLSLCELHIKQGSYELAAFLACKLKE-----  
 F9HSF5\_ECOLX -----MTVLGFTLLVGDSLCEFTVKERNIEFKAVLAYEPK-----  
 E8YBF8\_ECOKO -MLIALIVICLTVIVTALVTRKDLCEVRI RTGQTEVAVFDYESR--E-----  
 H6MHP8\_ECOLX -ALVAIVLCTVGLFTLMVGDSLCELSIRERGM EF KAVLAYESK-----  
 F4VXG3\_ECOLX -MLIALIVICLTVIVTALVTRKDLCEVRI RTGQTEVAVFTAYEPE--E-----  
 E1IRH6\_ECOLX -ALAAVIVLCLTVLGFTLLVGDSLCEFTVKERNIEFKVVLAYEPK-----  
 H5NFV4\_ECOLX -RLLSLIVICFTLLFFFTWMIRDLSLCELHIKQGSYELAAFLACNLK-----  
 H7CRD5\_ECO57 -LVWCVLIVCLTLLIFTYLRKSLCEIRYRDGYREVA AFMAYESG--K-----  
 F1XMB4\_ECO57 -I--IVGMLCLTMLLT VVWLHASPCEFRVSFMWSEIAAFLQCK---P-----  
 E8I9N6\_ECOLX -MLIALIVICLTVIVTALVTRKDLCEVRI RTGQTEVAVFTAYEPE--E-----  
 C8TWH1\_ECO26 -ALIGLLAVCATVLCFSLIFRERLCELNIYRGNTVQVTLAYEAR-----  
 E1IQK3\_ECOLX -ALVAIVLCTVGLFTLMVGDSLCELSIRERGM EF KAVLAYESK-----  
 B2NP37\_ECO57 -I--IVGMLCLTMLLT VVWLHASPCEFRVSFMWSEIAAFLQCK---P-----  
 D6GL38\_9ENTR -LLFGLVICFTILLTWMVRDLSLCELQLRQGNIELVAFLACDIKQ-----  
 G5TUD2\_ECOLX -ALVAVIVLCLTVLGFTLLVGDSLCEFTVKERNIEFKAVLAYEPK-----  
 E7TAB1\_SHIFL -MIVALIVICITAVVAALVTRKDLCEVHIRTGQTEVAVFTAYES--E-----  
 E9Y8K4\_ECOLX -MIVALIVICITAVVAALVTRKDLCEVHIRTGQTEVAVFTAYES--E-----  
 H1F377\_ECOLX -MIVALIVICITAVVAALVTRKDLCEVHIRTGQTEVAVFTAYES--E-----  
 F8XED9\_ECOLX -RLLSLIVICFTLLFFFTWMIRDLSLCELHIKQGSYELAAFLACNLK-----  
 F7MUV5\_ECOLX -L--TAITFCVTVILIIWMLHGSLCEIRMSFWGA EF AAFLOCK---Q-----  
 H4NJR3\_ECOLX -I--IVGMLCLTMLLT VVWLHASPCEFRVSFMWSEIAAFLQCK---P-----  
 H4KT12\_ECOLX -MIVALIVICITAVVAALVTRKDLCEVHIRTGQTEVAVFTAYES--E-----  
 H1FAP9\_ECOLX -MLIALIVICLTVIVTALVTRKDLCEVRI RTGQTEVAVFTAYEPE--E-----  
 F9CEP4\_ECOLX -ALAAVIVLCLTVLGFTLLVGDSLCEFTVKERNIEFKVVLAYEPK-----  
 B2U6D2\_ECOLX -LIWCVLIVCCTLLIFTLLTRNRLCEVRLKDGYREV TATMAYESGGK-----  
 B6ZRV0\_ECO57 -RLLSLIVICFTLLFFFTWMIRDLSLCELHIKQGSYELAAFLACNLK-----  
 B3X849\_ECOLX -RLLSLIVICFTLLFFFTWMIRDLSLCELHIKQGSYELAAFLACKLKE-----  
 E1IOA5\_ECOLX -LVVCLLIICITILFTLLTRQTLVELRFRDGDKEVAALMACTS--R-----  
 H5A0H9\_ECOLX -ALVAIVLCTVGLFTLMVGDSLCELSIRERGM EF KAVLAYESK-----  
 G5X3P4\_ECOLX -MIVALIVICITAVVAALVTRKDLCEVHIRTGQTEVAVFTAYES--E-----  
 H5KI64\_ECOLX -ALVAIVLCTVGLFTLMVGDSLCELSIRERGM EF KAVLAYESK-----  
 G5WI34\_ECOLX -FLMLLIVCVTILCFVWMVRDLSLGLRLQGGNTVLVATLAYEVK--R-----  
 F3Q9V6\_9ENTR ---MAIVLCTVGLFTLLVHSSLCELSIKERNIEFKAVLAYESK-----

```

D8B2D1_ECOLX -MLIALIVICLTVIVTALVTRKDLCEVRI RTGQTEVAVFTAYEPE-E-----
E9VCC9_ECOLX -MIVALIVICITAVVAALVTRKDLCEVHIRTGQTEVAVFTAYES--E-----
H5AV32_ECOLX -L---TTITFCVTAILIIWMLHGSLCEIRMSFWGAEEFAAFLQCK---Q-----
F3V7U1_SHIDY -L---TAITFCVTVILIIWMLHGSLCEIRMSFWGAEEFAAFLQCK---Q-----
E9Y8K6_ECOLX -ALAAVIVLCLTVLGFTLLVGDSLCEFTVKERNIEFKAVLAYEPK-----
H4YAG3_ECOLX -----MCATVLCFSLIFRERLCELNIIHRGNTVVQVTLAYEARQCEVFQGTPIYPETADPARA
E1IRH4_ECOLX -ALVAVIVLCLTVLGFTLLVGDSLCEFTVKERNIEFKAVLAYEPK-----
G5UXX9_ECOLX -RLLSLIVICFTLLFFTWMIRDLSLCELHIKQGSYELAAFLACNLK-----
C6UR89_ECO5T -MLIALIVICITVIVTALVTRKDLCEVRI RTGQTEVAVFTAYEPE-E-----
Q0H0B2_ECOLX -ALIGVLAVCATVLCFLLIFRERLCELNIIHRGNTVVQVTLAYEAR-----
C8SY02_KLEPR -LVWCVLIVCLTLLIFTCLTRNRLCEVRLKDG NREVAASLAYESNGK-----
H5H178_ECOLX -MIVALIVICITAVVAALVTRKDLCEVHIRTGQTEVAVFTAYES--E-----
C8TPL3_ECO26 -MLIALIVICLTVIVTALVTRKDLCEVRI RTGQTEVAVFTAYEPE-E-----
H9YME7_ECOKO -ALVAVIVLCLTVLGFTLLVGDSLCEFTVKERNIEFKAVLAYEPK-----
G5XGE5_ECOLX -ALVAIIVLCTVLGFTLLVGDSLCELSIRERGM EFKAVLAYESK-----
Q8Z607_SALTI -MLIALIVICLTVIVTALVTRKDLCEVRI RTGQTEVAVFVDYESR-E-----
I0QXL4_9ENTR LFIAGLIVICVTLLSFTWMTRDLSLCEIRFSDGIKEVVALMACETTR-----
G5WKB9_ECOLX -RLLSLIVICFTLLFFTWMIRDLSLCELHIKQGSYELAAFLACNLK-----
F4UZC8_ECOLX -ALVAVIVLCLTVLGFTLLVGDSLCEFTVKERNIEFKAVLAYEPK-----
H3M9M9_KLEOX -ALVAIVLCLTVLGFTLLVRSSLCELSIKERSMEFKAVLAYESK-----
B3H9D0_ECOLX -L---TAITFCVTVILIIWMLHGSLCEIRMSFWGAEEFAAFLQCK---Q-----
F1XSU4_ECO57 -ALVAVIVLCLTVPGFTLLVGDSLCEFTVKERNIEFRAVLAYEPK-----
D3RCX9_KLEVT -LLGGLVVICFTILLTWMVRDLSLCELQLRQGNIELVAFLACDIKQ-----
H4FPV2_ECOLX -MIVALIVICITAVVAALVTRKDLCEVHIRTGQTEVAVFTAYES--E-----
F9CJU5_ECOLX -L---TAIMFCVTVIFXIWMLHGSLCEFRNLN LGAEFAAFLQCK---Q-----
H5JUR0_ECOLX -ALAAVIVLCLTVLGFTLLVGDSLCEFTVKERNIEFKVVLAYEPK-----
H5AS66_ECOLX -I---IVGMLCLTMLLTVVWLHASPCEFRVSF MWSEIAAFLQCK---P-----
C8UQU5_ECO1A -VVLCVLIVCLTLLIFTWLTRNSLCELRLKDG TREVSAMVDYESG-K-----
G5X8B3_ECOLX -L---TAITFCVTAILIIWMLHGSLCEIRMSFWGAEEFAAFLQCK---Q-----
H4MLQ7_ECOLX -ALVAVIVLCLTVPGFTLLVGDSLCEFTVKERNIEFRAVLAYEPK-----
E7JA92_ECOLX -RLLSLIVICFTLLFFTWMIRDLSLCELHIKQGSYELAAFLACNLK-----
G0GSM6_KLEPN -ALVAIIVLCLTVLGFTLLVHSSLCELSIKERNIEFKAVLAYESK-----
G9RE52_9ENTR -ALVAIIVLCLTVLGFTLLVHSSLCELSIKERNIEFKAVLAYESK-----
H5CWM5_ECOLX -MIVALIVICITAVVAALVTRKDLCEVHIRTGQTEVAVFTAYES--E-----
G7RV84_KLEPN -LLGCVLIVCLTLLIFTYLTRKSLCEIRYRD TNREVAAFMAYESA-K-----
HOKC_SHIFL -MIVALIVICITAVVAALVTRKDLCEVHIRTGQTEVAVFTAYES--E-----
B3AGC6_ECO57 -RLLSLIVICFTLLFFTWMIRDLSLCELHIKQGSYELAAFLACNLK-----
H8WUZ6_SALTS ---MMLIVICVTILCFVMMVRDLSL CGLRLQQGN TVLVATLAYEVK-R-----
B5R4Z4_SALEP -MLIALIVICLTVIVTALVTRKDLCEVRI RTGQTEVAVFTAYEPE-E-----
E8H236_ECO57 -MIVALIVICITAVVAALVTRKDLCEVHIRTGQTEVAVFTAYES--E-----
G2AM71_ECOLX -RLLSLIVICFTLLFFTWMIRDLSLCELHIKQGSYELAAFLACNLK-----

```

\* ; . .

```

HOKC_ECOLI -----
F3VWM0_SHIBO -----
H5R5N6_ECOLX -----K
C6UVK1_ECO5T -----
HOKF_ECO57 -----K
H4V506_ECOLX -----K
E2QGR9_ECOLX -----
D6J7Q5_ECOLX -----K
F4TJV8_ECOLX -----K
G0F2P1_ECOLX -----
G1Z0S1_ECOLX -----K
G1YEQ3_ECOLX -----K
F9CTD1_ECOLX -----
H4IYN1_ECOLX -----
F5NNJ6_SHIFL -----
E1J5E3_ECOLX -----
B7N6Z5_ECOLU -----K
H1FMW9_ECOLX -----K
F9CSC2_ECOLX -----
H8D654_ECOLX -----K
E9TXJ2_ECOLX -----
H5J5L9_ECOLX -----K
H5NSR7_ECOLX -----
E2X956_SHIDY -----K
D8E1P5_ECOLX -----K
H5PSJ3_ECOLX -----E
D2AAD3_SHIF2 -----
H1DN41_ECOLX -----K
E9VJD7_ECOLX -----K
E9TYV6_ECOLX -----
F4UN92_ECOLX -----K
F8XK11_ECOLX -----
G1ZVT9_ECOLX -----K

```

|        |       |           |
|--------|-------|-----------|
| E9Y7R9 | ECOLX | -----     |
| H4LZX6 | ECOLX | -----E    |
| D6HWC9 | ECOLX | -----     |
| E2KHD1 | ECO57 | -----K    |
| F9S7G0 | 9VIBR | -----     |
| G5W2A4 | ECOLX | -----     |
| E8HUC2 | ECOLX | -----     |
| HOKD   | ECO57 | -----     |
| B2U569 | SHIB3 | -----     |
| H9YDF6 | ECOKO | CTQIYFSQK |
| E1IYD1 | ECOLX | -----     |
| G2FAK9 | ECOLX | -----     |
| E9XTT2 | ECOLX | -----     |
| E8II98 | ECOLX | -----K    |
| G5Y5U9 | ECOLX | -----     |
| B3HJT0 | ECOLX | -----K    |
| E9U427 | ECOLX | -----K    |
| D8E8Z0 | ECOLX | -----K    |
| G2S0L6 | ENTAL | -----     |
| H5JJ49 | ECOLX | -----     |
| E1PB25 | ECOAB | -----K    |
| H5GVQ2 | ECOLX | -----K    |
| E7HA11 | ECOLX | -----     |
| G8XCJ0 | KLEPN | -----     |
| H4JR53 | ECOLX | -----K    |
| G5XXC8 | ECOLX | -----     |
| Q3Z5Z9 | SHISS | -----     |
| E0IZ09 | ECOLW | -----     |
| G5KK22 | ECOLX | -----K    |
| H6MBN5 | ECOLX | -----     |
| D5CWF7 | ECOKI | -----K    |
| B2TTD6 | SHIB3 | -----K    |
| D3H5D3 | ECO44 | -----     |
| D6J6E3 | ECOLX | -----     |
| F5VK79 | ENTSA | -----     |
| B6ZP83 | ECO57 | -----K    |
| B3I927 | ECOLX | -----K    |
| H5FWT6 | ECOLX | -----     |
| H5BXU3 | ECOLX | -----E    |
| G5W9P6 | ECOLX | -----K    |
| D6IMK6 | ECOLX | -----     |
| H4Q809 | ECOLX | -----E    |
| E5B936 | ERWAM | -----     |
| D8C2A4 | ECOLX | -----     |
| F9HSF5 | ECOLX | -----K    |
| E8YBF8 | ECOKO | -----     |
| H6MHP8 | ECOLX | -----K    |
| F4VXG3 | ECOLX | -----     |
| E1IRH6 | ECOLX | -----K    |
| H5NFB4 | ECOLX | -----E    |
| H7CRD5 | ECO57 | -----     |
| F1XMB4 | ECO57 | -----     |
| E8I9N6 | ECOLX | -----     |
| C8TWH1 | ECO26 | -----K    |
| E1IQK3 | ECOLX | -----K    |
| B2NP37 | ECO57 | -----     |
| D6GL38 | 9ENTR | -----     |
| G5TUD2 | ECOLX | -----K    |
| E7TAB1 | SHIFL | -----     |
| E9Y8K4 | ECOLX | -----     |
| H1F377 | ECOLX | -----     |
| F8XED9 | ECOLX | -----E    |
| F7MUV5 | ECOLX | -----     |
| H4NJR3 | ECOLX | -----     |
| H4KT12 | ECOLX | -----     |
| H1FAP9 | ECOLX | -----     |
| F9CEP4 | ECOLX | -----K    |
| B2U6D2 | ECOLX | -----     |
| B6ZRV0 | ECO57 | -----E    |
| B3X849 | ECOLX | -----     |
| E1I0A5 | ECOLX | -----     |
| H5A0H9 | ECOLX | -----K    |
| G5X3P4 | ECOLX | -----     |
| H5KI64 | ECOLX | -----K    |
| G5WI34 | ECOLX | -----     |
| F3Q9V6 | 9ENTR | -----K    |
| D8B2D1 | ECOLX | -----     |

|              |           |
|--------------|-----------|
| E9VCC9_ECOLX | -----     |
| H5AV32_ECOLX | -----     |
| F3V7U1_SHIDY | -----     |
| E9Y8K6_ECOLX | -----K    |
| H4YAG3_ECOLX | STQ-----V |
| E1IRH4_ECOLX | -----K    |
| G5UXX9_ECOLX | -----E    |
| C6UR89_ECO5T | -----     |
| Q0H0B2_ECOLX | -----K    |
| C8SY02_KLEPR | -----     |
| H5H178_ECOLX | -----     |
| C8TPL3_ECO26 | -----     |
| H9YME7_ECOKO | -----K    |
| G5XGE5_ECOLX | -----K    |
| Q8Z607_SALTI | -----     |
| I0QXL4_9ENTR | -----     |
| G5WKB9_ECOLX | -----E    |
| F4UZC8_ECOLX | -----K    |
| H3M9M9_KLEOX | -----K    |
| B3H9D0_ECOLX | -----     |
| F1XSU4_ECO57 | -----K    |
| D3RCX9_KLEVT | -----     |
| H4FPV2_ECOLX | -----     |
| F9CJU5_ECOLX | -----     |
| H5JUR0_ECOLX | -----K    |
| H5AS66_ECOLX | -----     |
| C8UQU5_ECO1A | -----     |
| G5X8B3_ECOLX | -----     |
| H4MLQ7_ECOLX | -----K    |
| E7JA92_ECOLX | -----E    |
| G0GSM6_KLEPN | -----K    |
| G9RE52_9ENTR | -----K    |
| H5CWM5_ECOLX | -----     |
| G7RV84_KLEPN | -----     |
| HOKC_SHIFL   | -----     |
| B3AGC6_ECO57 | -----E    |
| H8WUZ6_SALTS | -----     |
| B5R4Z4_SALEP | -----     |
| E8H236_ECO57 | -----     |
| G2AM71_ECOLX | -----E    |

Supplemental Table S8. ConSurf Results.

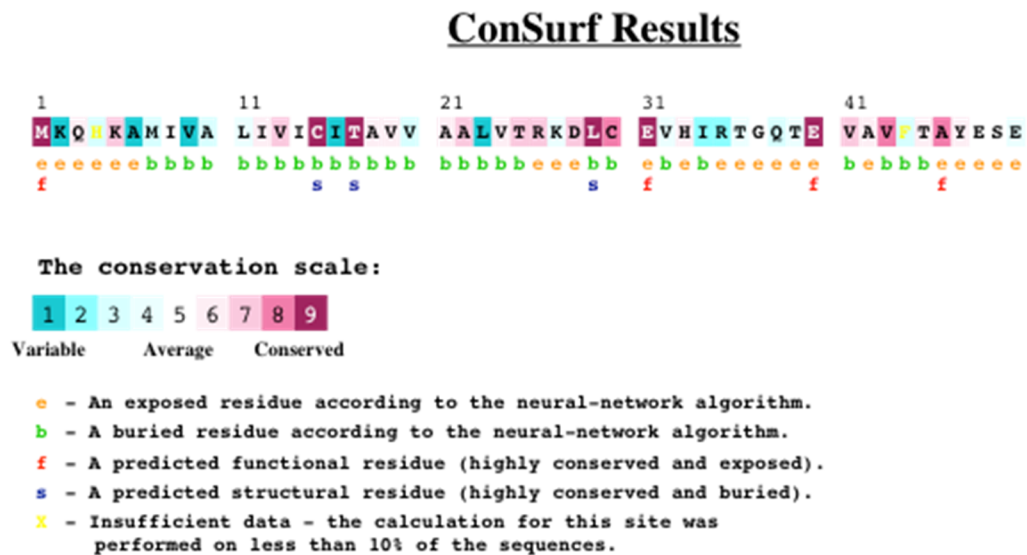

Table S9. Predictions of deleterious mutations in HokC family by PROVEAN.

Position  
Variants

|                       |
|-----------------------|
| Score                 |
| Predicted mutation    |
| 1                     |
| M,A,M                 |
| -2.534                |
| Deleterious           |
| 2                     |
| K,M,N,T,P,S,I,K,L,Q,W |
| 0.264                 |
| Neutral               |
| 3                     |
| Q,Q,R,P,S             |
| 0.000                 |
| Neutral               |
| 4                     |
| H,Q,L,N,R,H,G,A       |
| 0.518                 |
| Neutral               |
| 5                     |
| K,K,H,R,Q,N,S         |
| 0.000                 |
| Neutral               |
| 6                     |
| A,V,T,P,S,C,Y,A,I     |
| -1.188                |
| Neutral               |
| 7                     |
| M,M,G,R,V,I,F,A,L     |
| 0.000                 |
| Neutral               |
| 8                     |
| I,I,V,L,S             |
| 0.000                 |
| Neutral               |
| 9                     |
| V,V,M,G,W,L,A,F,I     |
| 0.000                 |
| Neutral               |
| 10                    |
| A,T,S,M,G,A,I,C       |
| -1.254                |
| Neutral               |
| 11                    |
| L,L,T,V,A,I           |
| 0.000                 |
| Neutral               |
| 12                    |
| I,G,F,I,V,L           |
| -6.218                |
| Deleterious           |
| 13                    |
| V,A,M,I,V,T           |
| -3.567                |
| Deleterious           |
| 14                    |
| I,M,F,I,V,L,S         |
| -2.495                |
| Neutral               |

15  
C,C  
0.000  
Neutral  
16  
I,C,F,I,A,M,V,L  
-2.476  
Neutral  
17  
T,T  
0.000  
Neutral  
18  
A,I,A,M,V,L  
2.002  
Neutral  
19  
V,I,L,V,P  
0.741  
Neutral  
20  
V,F,I,L,M,G,C,V,T,S  
-2.136  
Neutral  
21  
A,F,I,A,T,L,X  
3.270  
Neutral  
22  
A,V,T,L,S,A,I  
0.901  
Neutral  
23  
L,Y,L,W,F,C  
0.127  
Neutral  
24  
V,V,L,I,M  
0.000  
Neutral

**Table S10. Multiple deleterious mutations found in sequences of the HokC family.**

| <i>Uniprot sequence ID</i> | <i>Intolerable mutations</i> |
|----------------------------|------------------------------|
| <b>G2AM71_ECOLX</b>        | V19L, A22T                   |
| <b>G0F2P1_ECOLX</b>        | V19L, A22T                   |
| <b>E9XTT2_ECOLX</b>        | V13I, V19L, A22T             |
| <b>G5KK22_ECOLX</b>        | V19L, A22T                   |
| <b>B2TTD6_SHIB3</b>        | V19L, A22T                   |
| <b>E2X956_SHIDY</b>        | V19L, A22T                   |



|                     |                       |
|---------------------|-----------------------|
| <b>H4IYN1_ECOLX</b> | V19L, A22T            |
| <b>F9CEP4_ECOLX</b> | V19L, A22T            |
| <b>H5A0H9_ECOLX</b> | V19L, A22T            |
| <b>F9HSF5_ECOLX</b> | V19L, A22T            |
| <b>H5AS66_ECOLX</b> | A6T, V19L, A21T       |
| <b>E7JA92_ECOLX</b> | V19L, A22T            |
| <b>E1IQK3_ECOLX</b> | V19L, A22T            |
| <b>E9Y8K6_ECOLX</b> | V19L, A22T            |
| <b>G8XCJ0_KLEPN</b> | A6T, V13I, V19L, A22T |
| <b>H5JUR0_ECOLX</b> | V19L, A22T            |
| <b>H1FMW9_ECOLX</b> | V19L, A22T            |
| <b>H5BXU3_ECOLX</b> | V19L, A22T            |
| <b>G7RV84_KLEPN</b> | A6T, V13I, V19L, A22T |
| <b>C8TWH1_ECO26</b> | V19L, A22S            |
| <b>G5W9P6_ECOLX</b> | V19L, A22T            |
| <b>G2S0L6_ENTAL</b> | A6T, V13I, A22T       |
| <b>H5R5N6_ECOLX</b> | V19L, A22T            |
| <b>C8UQU5_ECO1A</b> | V13I, V19L, A22T      |
| <b>E1PB25_ECOAB</b> | V19L, A22T            |
| <b>E1I0A5_ECOLX</b> | V13I, V19L, A22T      |
| <b>B2U6D2_ECOLX</b> | V13I, V19L, A22T      |
| <b>G1Z0S1_ECOLX</b> | V19L, A22T            |
| <b>H7CRD5_ECO57</b> | V13I, V19L, A22T      |
| <b>D8E8Z0_ECOLX</b> | V19L, A22T            |
| <b>H4JR53_ECOLX</b> | V19L, A22T            |
| <b>B3X849_ECOLX</b> | V19L, A22T            |
| <b>E2KHD1_ECO57</b> | V19L, A22T            |
| <b>G1YEQ3_ECOLX</b> | V19L, A22T            |
| <b>F8XED9_ECOLX</b> | V19L, A22T            |
| <b>F4UZC8_ECOLX</b> | V19L, A22T            |

|                     |                  |
|---------------------|------------------|
| <b>C8SY02_KLEPR</b> | V13I, V19L, A22T |
| <b>D2AAD3_SHIF2</b> | V19L, A22T       |
| <b>H9YME7_ECOKO</b> | V19L, A22T       |
| <b>G5UXX9_ECOLX</b> | V19L, A22T       |
| <b>E7HA11_ECOLX</b> | A6T, V19L, A21T  |
| <b>E1IRH6_ECOLX</b> | V19L, A22T       |
| <b>B3HJT0_ECOLX</b> | V19L, A22T       |
| <b>B3AGC6_ECO57</b> | V19L, A22T       |
| <b>D6J7Q5_ECOLX</b> | V19L, A22T       |
| <b>E1IRH4_ECOLX</b> | V19L, A22T       |
| <b>D8C2A4_ECOLX</b> | V19L, A22T       |
| <b>E9VJD7_ECOLX</b> | V19L, A22T       |
| <b>H4V506_ECOLX</b> | V19L, A22T       |
| <b>D3RCX9_KLEVT</b> | V19L, A22T       |
| <b>G5TUD2_ECOLX</b> | V19L, A22T       |
| <b>B7N6Z5_ECOLU</b> | V19L, A22T       |
| <b>H6MHP8_ECOLX</b> | V19L, A22T       |
| <b>H4LZX6_ECOLX</b> | V19L, A22T       |
| <b>G5XGE5_ECOLX</b> | V19L, A22T       |
| <b>F3Q9V6_9ENTR</b> | V19L, A22T       |
| <b>D3H5D3_ECO44</b> | V13I, V19L, A22T |
| <b>D6GL38_9ENTR</b> | V19L, A22T       |
| <b>B3I927_ECOLX</b> | V19L, A22T       |
| <b>H5PSJ3_ECOLX</b> | V19L, A22T       |
| <b>E1IYD1_ECOLX</b> | V13I, V19L, A22T |
| <b>B6ZRV0_ECO57</b> | V19L, A22T       |
| <b>I0QXL4_9ENTR</b> | V19L, A22T       |
| <b>G9RE52_9ENTR</b> | V19L, A22T       |
| <b>H3M9M9_KLEOX</b> | V19L, A22T       |
| <b>F5NNJ6_SHIFL</b> | V19L, A22T       |

|                     |                  |
|---------------------|------------------|
| <b>E2QGR9_ECOLX</b> | V19L, A22T       |
| <b>B2U569_SHIB3</b> | V19L, A22T       |
| <b>H5J5L9_ECOLX</b> | V19L, A22T       |
| <b>E5B936_ERWAM</b> | V13I, V19L, A22T |
| <b>H4YAG3_ECOLX</b> | V19L, A22S       |
| <b>B2NP37_ECO57</b> | A6T, V19L, A21T  |
| <b>G5WI34_ECOLX</b> | K2M, A6T, V19L   |
| <b>G5WKB9_ECOLX</b> | V19L, A22T       |
| <b>F4TJV8_ECOLX</b> | V19L, A22T       |
| <b>G1ZVT9_ECOLX</b> | V19L, A22T       |
| <b>H5NFV4_ECOLX</b> | V19L, A22T       |
| <b>E9Y7R9_ECOLX</b> | A6T, V19L        |
| <b>H9YDF6_ECOKO</b> | V19L, A22T       |
| <b>H4NJR3_ECOLX</b> | A6T, V19L, A21T  |
| <b>H5KI64_ECOLX</b> | V19L, A22T       |
| <b>E9U427_ECOLX</b> | V19L, A22T       |
| <b>D5CWF7_ECOKI</b> | V19L, A22T       |
| <b>F9S7G0_9VIBR</b> | A6T, V19L, A22T  |
| <b>H4Q809_ECOLX</b> | V19L, A22T       |
| <b>H5GVQ2_ECOLX</b> | V19L, A22T       |
| <b>G0GSM6_KLEPN</b> | V19L, A22T       |
| <b>H8D654_ECOLX</b> | V19L, A22T       |
| <b>D8E1P5_ECOLX</b> | V19L, A22T       |
| <b>H1DN41_ECOLX</b> | V19L, A22T       |
| <b>F1XMB4_ECO57</b> | A6T, V19L, A21T  |

**Supplementary Table S11A. Globular proteins used to compute the correlated mutation index.**

| <b>PDB ID</b> | <b>Chain ID</b> |
|---------------|-----------------|
|---------------|-----------------|

|             |   |
|-------------|---|
| <b>1a3a</b> | A |
| <b>1a6m</b> | A |
| <b>1a70</b> | A |
| <b>1aap</b> | A |
| <b>1aba</b> | A |
| <b>1ag6</b> | A |
| <b>1aoe</b> | A |
| <b>1atl</b> | A |
| <b>1atz</b> | A |
| <b>1avs</b> | A |
| <b>1bdo</b> | A |
| <b>1beb</b> | A |
| <b>1beh</b> | A |
| <b>1bkr</b> | A |
| <b>1brf</b> | A |
| <b>1bsg</b> | A |
| <b>1c44</b> | A |
| <b>1c52</b> | A |
| <b>1c9o</b> | A |
| <b>1cc8</b> | A |
| <b>1chd</b> | A |
| <b>1cjw</b> | A |
| <b>1cke</b> | A |
| <b>1ctf</b> | A |
| <b>1cxy</b> | A |
| <b>1czn</b> | A |
| <b>1d0q</b> | A |
| <b>1d1q</b> | A |
| <b>1d4o</b> | A |
| <b>1dbx</b> | A |

|             |   |
|-------------|---|
| <b>1dix</b> | A |
| <b>1dlw</b> | A |
| <b>1dmg</b> | A |
| <b>1dqg</b> | A |
| <b>1dsx</b> | A |
| <b>1eaz</b> | A |
| <b>1ej0</b> | A |
| <b>1ej8</b> | A |
| <b>1ek0</b> | A |
| <b>1f6b</b> | A |
| <b>1fcy</b> | A |
| <b>1fk5</b> | A |
| <b>1fl0</b> | A |
| <b>1fna</b> | A |
| <b>1fmt</b> | A |
| <b>1fvg</b> | A |
| <b>1fvk</b> | A |
| <b>1fx2</b> | A |
| <b>1g2r</b> | A |
| <b>1g9o</b> | A |
| <b>1gbs</b> | A |
| <b>1gmi</b> | A |
| <b>1gmh</b> | A |
| <b>1guu</b> | A |
| <b>1gz2</b> | A |
| <b>1gzc</b> | A |
| <b>1h0p</b> | A |
| <b>1h2e</b> | A |
| <b>1h4x</b> | A |
| <b>1h98</b> | A |

|             |   |
|-------------|---|
| <b>1hdo</b> | A |
| <b>1hfc</b> | A |
| <b>1hh8</b> | A |
| <b>1htw</b> | A |
| <b>1hxn</b> | A |
| <b>1i1j</b> | A |
| <b>1i1n</b> | A |
| <b>1i4j</b> | A |
| <b>1i58</b> | A |
| <b>1i5g</b> | A |
| <b>1i71</b> | A |
| <b>1ihz</b> | A |
| <b>1iib</b> | A |
| <b>1im5</b> | A |
| <b>1iwd</b> | A |
| <b>1j3a</b> | A |
| <b>1jbe</b> | A |
| <b>1jbk</b> | A |
| <b>1jfu</b> | A |
| <b>1jfx</b> | A |
| <b>1jkx</b> | A |
| <b>1jl1</b> | A |
| <b>1jo0</b> | A |
| <b>1jo8</b> | A |
| <b>1jos</b> | A |
| <b>1jvw</b> | A |
| <b>1jwq</b> | A |
| <b>1jyh</b> | A |
| <b>1k6k</b> | A |
| <b>1k7c</b> | A |

|             |   |
|-------------|---|
| <b>1k7j</b> | A |
| <b>1kid</b> | A |
| <b>1kq6</b> | A |
| <b>1kqr</b> | A |
| <b>1ktg</b> | A |
| <b>1ku3</b> | A |
| <b>1kw4</b> | A |
| <b>1lm4</b> | A |
| <b>1lo7</b> | A |
| <b>1lpy</b> | A |
| <b>1m4j</b> | A |
| <b>1m8a</b> | A |
| <b>1mk0</b> | A |
| <b>1mug</b> | A |
| <b>1nb9</b> | A |
| <b>1ne2</b> | A |
| <b>1nps</b> | A |
| <b>1nrv</b> | A |
| <b>1ny1</b> | A |
| <b>1o1z</b> | A |
| <b>1p90</b> | A |
| <b>1pch</b> | A |
| <b>1pko</b> | A |
| <b>1qf9</b> | A |
| <b>1qjp</b> | A |
| <b>1ql0</b> | A |
| <b>1r26</b> | A |
| <b>1roa</b> | A |
| <b>1rw1</b> | A |
| <b>1rw7</b> | A |

|             |   |
|-------------|---|
| <b>1ryb</b> | A |
| <b>1smx</b> | A |
| <b>1svy</b> | A |
| <b>1t8k</b> | A |
| <b>1tif</b> | A |
| <b>1tqg</b> | A |
| <b>1tqh</b> | A |
| <b>1tzv</b> | A |
| <b>1vfy</b> | A |
| <b>1vhu</b> | A |
| <b>1vjk</b> | A |
| <b>1vmb</b> | A |
| <b>1vp6</b> | A |
| <b>1w0h</b> | A |
| <b>1whi</b> | A |
| <b>1wjx</b> | A |
| <b>1wkc</b> | A |
| <b>1xdz</b> | A |
| <b>1xff</b> | A |
| <b>1xkr</b> | A |
| <b>2arc</b> | A |
| <b>2cua</b> | A |
| <b>2hs1</b> | A |
| <b>2mhr</b> | A |
| <b>2phy</b> | A |
| <b>2tps</b> | A |
| <b>2vxn</b> | A |
| <b>3bor</b> | A |
| <b>3dqq</b> | A |
| <b>5ptp</b> | A |



**Supplementary Table S11B. Transmembrane proteins used to compute the correlated mutation index.**

| <b><i>PDB ID</i></b> | <b><i>Chain ID</i></b> |
|----------------------|------------------------|
| 2fma                 | A                      |
| 1lv7                 | A                      |
| 1ihr                 | A                      |
| 1l2p                 | A                      |
| 1nkz                 | R                      |
| 1rzh                 | H                      |
| 2wjn                 | H                      |
| 2cua                 | A                      |
| 3s8f                 | C                      |
| 3cx5                 | O                      |
| 3cx5                 | P                      |
| 3cx5                 | S                      |
| 3cx5                 | T                      |
| 1kqf                 | H                      |
| 1nkz                 | S                      |
| 1v54                 | Q                      |
| 1v54                 | T                      |
| 1v54                 | V                      |
| 1v54                 | W                      |
| 1v54                 | X                      |
| 1v54                 | Y                      |
| 1v54                 | Z                      |
| 1s3e                 | A                      |
| 1e2w                 | A                      |
| 1a64                 | A                      |

|             |   |
|-------------|---|
| <b>1fv1</b> | A |
| <b>1icf</b> | I |
| <b>1xiw</b> | A |
| <b>4tsv</b> | A |
| <b>1mf7</b> | A |
| <b>1xh3</b> | A |
| <b>2hft</b> | — |
| <b>1ijq</b> | A |
| <b>1aly</b> | — |
| <b>1v7p</b> | C |
| <b>1eue</b> | A |
| <b>1i4f</b> | A |
| <b>1b0x</b> | A |
| <b>1f2l</b> | A |
| <b>1b4f</b> | B |
| <b>1bqu</b> | A |
| <b>2ddf</b> | A |
| <b>1n7s</b> | B |
| <b>1bte</b> | A |
| <b>1tjx</b> | A |
| <b>1juf</b> | A |
| <b>1ql3</b> | A |
| <b>1cdy</b> | — |
| <b>1cfb</b> | — |
| <b>1eer</b> | C |
| <b>1mjn</b> | A |
| <b>1j8e</b> | A |
| <b>1hcz</b> | — |
| <b>1dg6</b> | A |
| <b>1d5m</b> | B |

|             |   |
|-------------|---|
| <b>1iak</b> | A |
| <b>1iak</b> | B |
| <b>1dl2</b> | A |
| <b>1r1h</b> | A |
| <b>1klu</b> | B |
| <b>1dp4</b> | A |
| <b>1dqg</b> | A |
| <b>1dqt</b> | A |
| <b>1e1h</b> | B |
| <b>1gp0</b> | A |
| <b>1e87</b> | A |
| <b>1eax</b> | A |
| <b>1edh</b> | A |
| <b>1epf</b> | A |
| <b>1rew</b> | D |
| <b>1g1t</b> | A |
| <b>1ext</b> | A |
| <b>1f46</b> | A |
| <b>1yro</b> | D |
| <b>2b8l</b> | A |
| <b>1flt</b> | X |
| <b>1x9d</b> | A |
| <b>1fne</b> | A |
| <b>1lk2</b> | A |
| <b>1g1s</b> | A |
| <b>1r2d</b> | A |
| <b>1gv9</b> | A |
| <b>1p9a</b> | G |
| <b>1o7q</b> | A |
| <b>2cl5</b> | A |

|             |   |
|-------------|---|
| <b>1he7</b> | A |
| <b>1jgd</b> | A |
| <b>1qwn</b> | A |
| <b>1vca</b> | A |
| <b>1iko</b> | P |
| <b>1s55</b> | A |
| <b>1jd0</b> | A |
| <b>1jdp</b> | A |
| <b>1jfu</b> | A |
| <b>1jln</b> | A |
| <b>1yuk</b> | B |
| <b>2bnu</b> | A |
| <b>1m9z</b> | A |
| <b>1lqv</b> | A |
| <b>1lar</b> | A |
| <b>1lcy</b> | A |
| <b>1lr0</b> | A |
| <b>1lzj</b> | A |
| <b>1m6o</b> | A |
| <b>1n3y</b> | A |
| <b>1ncg</b> | — |
| <b>1neu</b> | — |
| <b>1nko</b> | A |
| <b>1nkr</b> | — |
| <b>1npu</b> | A |
| <b>1nrj</b> | B |
| <b>1pfq</b> | A |
| <b>1z8g</b> | A |
| <b>1uze</b> | A |
| <b>1qfo</b> | A |

|             |   |
|-------------|---|
| <b>1olz</b> | A |
| <b>1wt4</b> | B |
| <b>1yfn</b> | E |
| <b>1ot8</b> | A |
| <b>1p15</b> | A |
| <b>2f8y</b> | B |
| <b>1pt6</b> | A |
| <b>1r55</b> | A |
| <b>1rfs</b> | — |
| <b>1rhf</b> | A |
| <b>1rm8</b> | A |
| <b>1shu</b> | X |
| <b>1t0p</b> | B |
| <b>1uv7</b> | A |
| <b>1v84</b> | A |
| <b>1w15</b> | A |
| <b>1wwc</b> | A |
| <b>1xed</b> | A |
| <b>1xiw</b> | F |
| <b>1xu1</b> | R |
| <b>1ydp</b> | A |
| <b>2o3s</b> | A |
| <b>1z40</b> | A |
| <b>1z5y</b> | E |
| <b>1z9l</b> | A |
| <b>2a6z</b> | A |
| <b>2fy7</b> | A |
| <b>2ajc</b> | A |
| <b>2b7k</b> | A |
| <b>2hc1</b> | A |

|             |   |
|-------------|---|
| <b>2c6c</b> | A |
| <b>2c7s</b> | A |
| <b>2fcb</b> | A |
| <b>2gu3</b> | A |
| <b>2tnf</b> | A |
| <b>2apc</b> | A |
| <b>2nvg</b> | A |
| <b>2j8c</b> | H |
| <b>2bba</b> | A |
| <b>2ciu</b> | A |
| <b>2d0j</b> | A |
| <b>2gak</b> | A |
| <b>2gsf</b> | A |
| <b>2h1b</b> | A |
| <b>2h26</b> | A |
| <b>2h4v</b> | A |
| <b>2hey</b> | R |
| <b>2hew</b> | F |
| <b>2hjl</b> | A |
| <b>2hlr</b> | A |
| <b>2i1m</b> | A |
| <b>2i6v</b> | A |
| <b>2ims</b> | A |
| <b>2jcq</b> | A |
| <b>2isg</b> | A |
| <b>3arc</b> | e |
| <b>3arc</b> | f |
| <b>3arc</b> | h |
| <b>3arc</b> | i |
| <b>3arc</b> | j |

|             |   |
|-------------|---|
| <b>3arc</b> | k |
| <b>3arc</b> | l |
| <b>3arc</b> | m |
| <b>3arc</b> | t |
| <b>3arc</b> | y |
| <b>3arc</b> | x |
| <b>2z62</b> | A |
| <b>3llk</b> | C |
| <b>4n7i</b> | A |
| <b>2qqi</b> | A |
| <b>2r2o</b> | B |
| <b>1fv1</b> | E |
| <b>2gh0</b> | B |
| <b>3sov</b> | A |
| <b>2omz</b> | B |
| <b>2haz</b> | A |
| <b>4kmy</b> | A |
| <b>4fyt</b> | A |
| <b>4km6</b> | A |
| <b>1sm3</b> | P |
| <b>1itu</b> | B |
| <b>2o6l</b> | B |
| <b>3s98</b> | A |
| <b>1ly2</b> | A |
| <b>4h2g</b> | A |
| <b>3jxf</b> | B |
| <b>3i84</b> | B |
| <b>3v6o</b> | B |
| <b>2pet</b> | A |
| <b>1ypq</b> | B |

|             |   |
|-------------|---|
| <b>2fh7</b> | A |
| <b>3teq</b> | D |
| <b>4cnm</b> | A |
| <b>2h62</b> | D |
| <b>1eg4</b> | P |
| <b>4gwm</b> | B |
| <b>3pv7</b> | A |
| <b>3kgr</b> | C |
| <b>4l4v</b> | C |
| <b>3f6k</b> | A |
| <b>4h5s</b> | B |
| <b>3n2n</b> | F |
| <b>3wn4</b> | A |
| <b>2jjw</b> | A |
| <b>4hdq</b> | C |
| <b>3fed</b> | A |
| <b>3h6n</b> | A |
| <b>3pxh</b> | A |
| <b>2y8t</b> | D |
| <b>1ynl</b> | H |
| <b>3nfk</b> | D |
| <b>2bnq</b> | E |
| <b>3pve</b> | B |
| <b>2d3v</b> | A |
| <b>4eby</b> | A |
| <b>2qsq</b> | B |
| <b>1h03</b> | Q |
| <b>4fke</b> | A |
| <b>3cl5</b> | A |
| <b>3qw9</b> | B |



|             |   |
|-------------|---|
| <b>2dur</b> | B |
| <b>3qup</b> | A |
| <b>3nk4</b> | D |
| <b>2wv3</b> | A |
| <b>2yz1</b> | B |
| <b>4fww</b> | A |
| <b>3t6q</b> | B |
| <b>3bix</b> | D |
| <b>3o71</b> | B |
| <b>2xot</b> | B |
| <b>2ox9</b> | D |
| <b>2ic2</b> | B |
| <b>4lxj</b> | A |
| <b>2a6v</b> | B |
| <b>2qqj</b> | A |
| <b>2v9t</b> | A |
| <b>2vsm</b> | B |
| <b>3r0n</b> | A |
| <b>2ffu</b> | A |
| <b>3n1f</b> | D |
| <b>1po5</b> | A |
| <b>3g5b</b> | A |
| <b>2j0a</b> | A |
| <b>2ooq</b> | B |
| <b>3noi</b> | B |
| <b>4oac</b> | A |
| <b>3ner</b> | B |
| <b>3l4y</b> | A |
| <b>4j2c</b> | C |
| <b>1hq8</b> | A |

|             |   |
|-------------|---|
| <b>4dnd</b> | A |
| <b>1oll</b> | A |
| <b>3ff9</b> | B |
| <b>1gl2</b> | C |
| <b>3q3j</b> | A |
| <b>4iqh</b> | C |
| <b>3pvh</b> | A |
| <b>4h5s</b> | A |
| <b>1cyo</b> | A |
| <b>2q86</b> | C |
| <b>1oga</b> | E |
| <b>2q86</b> | D |
| <b>2aju</b> | H |
| <b>3vcl</b> | A |
| <b>1uvq</b> | A |
| <b>1qjb</b> | S |
| <b>1lcj</b> | B |
| <b>2hi4</b> | A |
| <b>3rl1</b> | A |
| <b>3vj6</b> | A |
| <b>1j02</b> | A |
| <b>1n45</b> | B |
| <b>4a4y</b> | A |
| <b>3owv</b> | B |
| <b>3lgi</b> | C |
| <b>3azc</b> | A |
| <b>2rl8</b> | B |
| <b>3khq</b> | A |
| <b>2wy3</b> | D |
| <b>2yd1</b> | A |

|             |   |
|-------------|---|
| <b>4nn5</b> | B |
| <b>2bvp</b> | A |
| <b>3rrc</b> | B |
| <b>2h64</b> | C |
| <b>3m9z</b> | A |
| <b>3b5n</b> | I |
| <b>1xr9</b> | A |
| <b>4jqv</b> | A |
| <b>3ln4</b> | A |
| <b>4jqu</b> | B |
| <b>3fp2</b> | A |
| <b>3zf8</b> | A |
| <b>1tvb</b> | F |
| <b>4g1i</b> | B |
| <b>2ibj</b> | A |
| <b>4hq1</b> | A |
| <b>4nzt</b> | M |
| <b>3q2u</b> | A |
| <b>2wo1</b> | B |
| <b>2zvy</b> | B |
| <b>2jik</b> | B |
| <b>3cyp</b> | E |
| <b>4e5x</b> | H |
| <b>1eaj</b> | B |
| <b>3ig3</b> | A |
| <b>4bhu</b> | J |
| <b>1ci3</b> | M |
| <b>4dgj</b> | D |
| <b>3gmg</b> | B |
| <b>4esq</b> | A |

|             |   |
|-------------|---|
| <b>3c5j</b> | B |
| <b>1rwi</b> | B |
| <b>1zxk</b> | B |
| <b>3f61</b> | A |
| <b>3ca7</b> | A |
| <b>4alz</b> | A |
| <b>3onj</b> | A |
| <b>1obx</b> | B |
| <b>2oo4</b> | B |
| <b>2wnf</b> | A |
| <b>2ptt</b> | B |
| <b>2guz</b> | O |
| <b>4of8</b> | D |
| <b>3q4u</b> | D |
| <b>1wt6</b> | D |
| <b>3jxg</b> | D |
| <b>2z3q</b> | D |
| <b>4bkj</b> | B |
| <b>1jr8</b> | B |
| <b>3o3u</b> | N |
| <b>1d4t</b> | B |
| <b>3gyl</b> | B |
| <b>3ey6</b> | A |
| <b>2wy3</b> | C |
| <b>2rei</b> | A |
| <b>3q0h</b> | B |
| <b>4ggj</b> | A |
| <b>2oya</b> | B |
| <b>2bpd</b> | B |
| <b>3vpp</b> | B |

|             |   |
|-------------|---|
| <b>3so5</b> | B |
| <b>3mw4</b> | C |
| <b>3lz6</b> | D |
| <b>2q8o</b> | B |
| <b>4nmu</b> | D |
| <b>2avd</b> | B |
| <b>2frg</b> | P |
| <b>4esk</b> | D |
| <b>4de9</b> | A |
| <b>4gos</b> | A |
| <b>4oag</b> | B |
| <b>2f4w</b> | B |
| <b>2gw5</b> | A |
| <b>2c1i</b> | A |
| <b>1ugn</b> | A |
| <b>4mz2</b> | A |
| <b>2e7v</b> | A |
| <b>4m7h</b> | B |
| <b>3dlq</b> | R |
| <b>2b69</b> | A |
| <b>3p2t</b> | A |
| <b>3wbp</b> | B |
| <b>1s1d</b> | B |
| <b>2pof</b> | B |
| <b>3ff7</b> | D |
| <b>3mxo</b> | B |
| <b>3mvs</b> | A |
| <b>4apx</b> | B |
| <b>3n1m</b> | C |
| <b>2hl7</b> | A |

|             |   |
|-------------|---|
| <b>3vbc</b> | A |
| <b>3bod</b> | A |
| <b>4e74</b> | A |
| <b>4m92</b> | B |
| <b>1u9k</b> | B |
| <b>2xr6</b> | A |
| <b>1smo</b> | B |
| <b>2yhf</b> | I |
| <b>4ezf</b> | B |
| <b>4ak8</b> | D |
| <b>2c6u</b> | A |
| <b>4lu3</b> | A |
| <b>3wh2</b> | A |
| <b>2q87</b> | C |
| <b>2oq5</b> | A |
| <b>2yfx</b> | A |
| <b>2r32</b> | A |
| <b>3mdm</b> | A |
| <b>4gel</b> | B |
| <b>4lr2</b> | A |
| <b>3bp6</b> | B |
| <b>3rs1</b> | B |
| <b>1t8t</b> | B |
| <b>2icc</b> | A |
| <b>2wh6</b> | A |
| <b>2xz4</b> | B |
| <b>2o9g</b> | D |
| <b>3bs6</b> | B |
| <b>2fwh</b> | A |
| <b>1d06</b> | A |

|             |   |
|-------------|---|
| <b>2ff7</b> | A |
| <b>1b12</b> | A |
| <b>2cbz</b> | A |
| <b>1d4o</b> | A |
| <b>3llo</b> | A |
| <b>1a3a</b> | A |
| <b>2zpm</b> | A |
| <b>1vls</b> | — |
| <b>1rzh</b> | L |
| <b>2a65</b> | A |
| <b>1dsx</b> | D |
| <b>1rzh</b> | M |
| <b>1m0k</b> | C |
| <b>2ih3</b> | F |
| <b>2wjn</b> | L |
| <b>2wjn</b> | M |
| <b>2jaf</b> | C |
| <b>2bs2</b> | F |
| <b>3s8f</b> | A |
| <b>3cx5</b> | N |
| <b>3qap</b> | A |
| <b>1h2s</b> | D |
| <b>4dx5</b> | C |
| <b>3arc</b> | a |
| <b>3arc</b> | b |
| <b>3arc</b> | c |
| <b>3arc</b> | d |
| <b>1kqf</b> | I |
| <b>3ldc</b> | D |
| <b>2gsm</b> | A |

|             |   |
|-------------|---|
| <b>2gsm</b> | B |
| <b>4eiy</b> | A |
| <b>3bya</b> | B |
| <b>1v54</b> | N |
| <b>1v54</b> | O |
| <b>1v54</b> | P |
| <b>1ors</b> | C |
| <b>4n6h</b> | A |
| <b>1q16</b> | C |
| <b>2b6o</b> | A |
| <b>1u7g</b> | C |
| <b>1xio</b> | A |
| <b>2h88</b> | C |
| <b>2h88</b> | D |
| <b>2f2b</b> | D |
| <b>2b2h</b> | C |
| <b>3k04</b> | E |
| <b>2a0b</b> | — |
| <b>1gpr</b> | — |
| <b>1djl</b> | A |
| <b>1dqa</b> | A |
| <b>1mqi</b> | A |
| <b>1fx2</b> | A |
| <b>1fx4</b> | A |
| <b>1g4y</b> | B |
| <b>1id0</b> | A |
| <b>1ijy</b> | A |
| <b>1xzz</b> | A |
| <b>1nxc</b> | A |
| <b>1p0z</b> | A |



|             |   |
|-------------|---|
| <b>1pb7</b> | A |
| <b>1py9</b> | A |
| <b>1q3e</b> | A |
| <b>1s50</b> | A |
| <b>1t0j</b> | C |
| <b>2f34</b> | A |
| <b>1uc7</b> | A |
| <b>1xaw</b> | A |
| <b>1x13</b> | A |
| <b>1xkz</b> | A |
| <b>1ysr</b> | A |
| <b>2hje</b> | A |
| <b>2a5s</b> | A |
| <b>2xov</b> | A |
| <b>4a82</b> | B |
| <b>2j8c</b> | L |
| <b>2j8c</b> | M |
| <b>2bcx</b> | B |
| <b>2bou</b> | A |
| <b>2ixe</b> | A |
| <b>3i8s</b> | C |
| <b>3l9w</b> | B |
| <b>3bp3</b> | B |
| <b>3fwz</b> | B |
| <b>4n7w</b> | A |
| <b>3qbg</b> | D |
| <b>3arc</b> | Z |
| <b>3pcv</b> | C |
| <b>3b9w</b> | C |
| <b>3m73</b> | C |

|             |   |
|-------------|---|
| <b>3d9s</b> | D |
| <b>3ddl</b> | A |
| <b>4al0</b> | C |
| <b>3gd8</b> | D |
| <b>2qts</b> | C |
| <b>3zpj</b> | D |
| <b>4f4s</b> | T |
| <b>2xqu</b> | P |
| <b>3v5u</b> | A |
| <b>3tds</b> | D |
| <b>3ouf</b> | E |
| <b>3rlb</b> | A |
| <b>4ikv</b> | A |
| <b>3gkj</b> | A |
| <b>4ms4</b> | B |
| <b>3a1f</b> | A |
| <b>3rn8</b> | C |
| <b>2vns</b> | B |
| <b>3w19</b> | C |
| <b>2y8t</b> | E |
| <b>3lsw</b> | A |
| <b>3s9e</b> | B |
| <b>1mix</b> | A |
| <b>3om0</b> | A |
| <b>3lwt</b> | X |
| <b>4m5b</b> | A |
| <b>4o6y</b> | B |
| <b>4etv</b> | B |
| <b>3a9f</b> | B |
| <b>2pux</b> | C |

|             |   |
|-------------|---|
| <b>2voh</b> | B |
| <b>3dt5</b> | A |
| <b>1z0w</b> | A |
| <b>2xme</b> | L |
| <b>3skx</b> | A |
| <b>2r48</b> | A |
| <b>3kkb</b> | B |
| <b>3ehg</b> | A |
| <b>3tyq</b> | B |
| <b>1aol</b> | A |
| <b>2x49</b> | A |
| <b>3iqt</b> | A |
| <b>4o6m</b> | B |
| <b>4pgr</b> | A |
| <b>3gwi</b> | A |
| <b>4hhx</b> | A |
| <b>3ezh</b> | B |
| <b>3pp4</b> | P |
| <b>4dey</b> | B |
| <b>1mvu</b> | P |
| <b>4bgc</b> | A |
| <b>4e29</b> | B |
| <b>3g3t</b> | A |
| <b>3hfe</b> | C |
| <b>2pfi</b> | B |
| <b>2cjz</b> | A |
| <b>3jrr</b> | B |
| <b>2jli</b> | A |
| <b>2r4q</b> | A |
| <b>2nl9</b> | A |

|             |   |
|-------------|---|
| <b>3k6y</b> | A |
| <b>3rkg</b> | A |
| <b>1txo</b> | B |
| <b>4dex</b> | B |
| <b>3pty</b> | A |
| <b>2xdg</b> | B |
| <b>3zlc</b> | B |
| <b>3kyz</b> | A |
| <b>3qxm</b> | B |
| <b>3hrn</b> | A |
| <b>3nfl</b> | H |
| <b>2vay</b> | B |
| <b>4erv</b> | A |
| <b>4djc</b> | B |
| <b>3ftj</b> | A |
| <b>3swy</b> | C |
| <b>4loj</b> | B |
| <b>3sl2</b> | A |
| <b>1xhk</b> | B |
| <b>3vn0</b> | D |
| <b>2wji</b> | B |
| <b>4gag</b> | P |
| <b>2v3u</b> | A |
| <b>1s6c</b> | B |
| <b>2w5q</b> | A |
| <b>4gt8</b> | A |
| <b>3eu9</b> | C |
| <b>4emt</b> | B |
| <b>3cqb</b> | B |
| <b>4n5q</b> | B |

|             |   |
|-------------|---|
| <b>1ia9</b> | B |
| <b>1wv3</b> | A |
| <b>2rca</b> | B |
| <b>2rfa</b> | A |
| <b>4ehq</b> | G |
| <b>3t4l</b> | B |
| <b>4aqr</b> | D |
| <b>2rc8</b> | B |
| <b>2xtp</b> | A |
| <b>3dxs</b> | X |
| <b>4pas</b> | A |
| <b>2f37</b> | B |
| <b>2etb</b> | A |
| <b>1qjp</b> | A |
| <b>3m4d</b> | G |
| <b>3prn</b> | — |
| <b>4gcs</b> | A |
| <b>2fgq</b> | B |
| <b>2vdf</b> | A |
| <b>1kmo</b> | A |
| <b>3gp6</b> | A |
| <b>2guf</b> | A |
| <b>1qj8</b> | A |
| <b>2por</b> | — |
| <b>3pgu</b> | A |
| <b>1yc9</b> | C |
| <b>2erv</b> | B |
| <b>1xkw</b> | A |
| <b>2gr8</b> | D |
| <b>2o4v</b> | C |

|      |   |
|------|---|
| 2j1n | C |
| 2y2x | A |
| 3aeh | A |
| 2zfg | C |
| 3fid | A |
| 4afk | A |
| 2wjr | A |
| 2x55 | A |
| 4fqe | A |
| 3szv | A |
| 4e1s | A |
| 3qra | A |
| 4frx | A |
| 1f00 | I |

**Supplementary Table S12A. Globular proteins used to compute maximal cliques, size-order and spherical coordinates.**

16PK A, 1A0M A, 1A0M B, 1A12 A, 1A12 B, 1A12 C, 1A1X A, 1A27 A, 1A2P A, 1A2P B, 1A2P C, 1A3A A, 1A3A B, 1A3A C, 1A3A D, 1A3I A, 1A3I B, 1A3I C, 1A3J A, 1A3J B, 1A3J C, 1A4I A, 1A4I B, 1A62 A, 1A6M A, 1A6Q A, 1A7S A, 1A7T A, 1A7T B, 1A7Y A, 1A7Y B, 1A7Y C, 1A7Z A, 1A7Z B, 1A8D A, 1A8L A, 1A8Q A, 1A92 A, 1A92 B, 1A92 C, 1A92 D, 1A9X A, 1A9X B, 1A9X C, 1A9X D, 1A9X E, 1A9X F, 1A9X G, 1A9X H, 1AA5 A, 1AA5 B, 1AAP A, 1AAP B, 1ABA A, 1ACF A, 1AE9 A, 1AE9 B, 1AF7 A, 1AG9 A, 1AG9 B, 1AGJ A, 1AGJ B, 1AGQ A, 1AGQ B, 1AGQ C, 1AGQ D, 1AH7 A, 1AHO A, 1AIE A, 1AJ2 A, 1AJ8 A, 1AJ8 B, 1AJJ A, 1AJK A, 1AJK B, 1AK0 A, 1AKG A, 1AKO A, 1AL3 A, 1AL4 A, 1AL4 B, 1ALQ A, 1ALU A, 1ALX A, 1ALX B, 1ALY A, 1ALZ A, 1ALZ B, 1AMT A, 1AMT B, 1AMT C, 1AMU A, 1AMU B, 1AMX A, 1AOC A, 1AOC B, 1AOE A, 1AOE B, 1AOH A, 1AOH B, 1AOL A, 1AOZ A, 1AOZ B, 1APY A, 1APY B, 1APY C, 1APY D, 1AQZ A, 1AQZ B, 1AT0 A, 1ATG A, 1ATZ A, 1ATZ B, 1AUO A, 1AUO B, 1AV2 A, 1AV2 B, 1AV2 C, 1AV2 D, 1AVY A, 1AVY B, 1AVY C, 1AYE A, 1AYO A, 1AYO B, 1AZO A, 1B0B A, 1B0N A, 1B0N B, 1B0U A, 1B0X A, 1B12 A, 1B12 B, 1B12 C, 1B12 D, 1B1C A, 1B25 A, 1B25 B, 1B25 C, 1B25 D, 1B2P A, 1B2P B, 1B4F A, 1B4F B, 1B4F C, 1B4F D, 1B4F E, 1B4F F, 1B4F G, 1B4F H, 1B5E A, 1B5E B, 1B5F A, 1B5F B, 1B5F C, 1B5F D, 1B5P A, 1B5P B, 1B5Q A, 1B5Q B, 1B5Q C, 1B63 A, 1B65 A, 1B65 B, 1B65 C, 1B65 D, 1B65 E, 1B65 F, 1B67 A, 1B67 B, 1B6A A, 1B6G A, 1B8A A, 1B8A B, 1B93 A, 1B93 B, 1B93 C, 1B9H A, 1B9M A, 1B9M B, 1B9O A, 1B9W A, 1BAM A, 1BAZ A, 1BAZ B, 1BAZ C, 1BAZ D, 1BD3 A, 1BD3 B, 1BD3 C, 1BD3 D, 1BD8 A, 1BDO A, 1BDW A, 1BDW B, 1BEA A, 1BF2 A, 1BF6 A, 1BF6 B, 1BG6

A,1BGC A,1BGF A,1BGP A,1BGV A,1BHD A,1BHD B,1BHE A,1BI5 A,1BIF A,1BJ7 A,1BKB A,1BKP A,1BKP B,1BKR A,1BM8 A,1BM9 A,1BM9 B,1BOL A,1BQB A,1BQC A,1BQU A,1BQU B,1BRT A,1BS0 A,1BSL A,1BSL B,1BTE A,1BTE B,1BTK A,1BTK B,1BTN A,1BU8 A,1BUO A,1BUU A,1BX4 A,1BX7 A,1BXY A,1BXY B,1BY2 A,1BYF A,1BYF B,1BYI A,1BYR A,1BYZ A,1BYZ B,1BYZ C,1BYZ D,1BZ4 A,1C0P A,1C0Q A,1C0Q B,1C0R A,1C0R B,1C1K A,1C3C A,1C3C B,1C3M A,1C3P A,1C44 A,1C4D A,1C4D B,1C4D C,1C4D D,1C4O A,1C4Q A,1C4Q B,1C4Q C,1C4Q D,1C4Q E,1C52 A,1C53 A,1C5E A,1C5E B,1C5E C,1C75 A,1C7K A,1C7N A,1C7N B,1C7N C,1C7N D,1C7N E,1C7N F,1C7N G,1C7N H,1C8U A,1C8U B,1C9O A,1C9O B,1CB0 A,1CB8 A,1CC8 A,1CCW A,1CCW B,1CCW C,1CCW D,1CCZ A,1CDC A,1CDC B,1CEO A,1CEW I,1CFB A,1CG5 A,1CG5 B,1CHD A,1CHM A,1CHM B,1CI4 A,1CI4 B,1CI9 A,1CI9 B,1CJC A,1CJW A,1CKA A,1CKA B,1CKE A,1CMC A,1CMC B,1CNV A,1COJ A,1COZ A,1COZ B,1CPN A,1CPQ A,1CQ3 A,1CQ3 B,1CQ4 A,1CQ4 B,1CQM A,1CQM B,1CQX A,1CQX B,1CQY A,1CRU A,1CRU B,1CS1 A,1CS1 B,1CS1 C,1CS1 D,1CS6 A,1CS8 A,1CSB A,1CSB B,1CSB D,1CSB E,1CSH A,1CT5 A,1CT9 A,1CT9 B,1CT9 C,1CT9 D,1CTF A,1CUK A,1CUN A,1CUN B,1CUN C,1CV8 A,1CVR A,1CXC A,1CXQ A,1CXY A,1CY5 A,1CY9 A,1CY9 B,1CYD A,1CYD B,1CYD C,1CYD D,1CZA N,1CZF A,1CZF B,1CZQ A,1CZQ D,1CZT A,1CZY A,1CZY B,1CZY C,1CZY D,1CZY E,1D0Q A,1D0Q B,1D1Q A,1D1Q B,1D2N A,1D2O A,1D2O B,1D2S A,1D2T A,1D2Z A,1D2Z B,1D2Z C,1D2Z D,1D3B A,1D3B B,1D3B C,1D3B D,1D3B E,1D3B F,1D3B G,1D3B H,1D3B I,1D3B J,1D3B K,1D3B L,1D3Y A,1D3Y B,1D4A A,1D4A B,1D4A C,1D4A D,1D4O A,1D4T A,1D4T B,1D5T A,1D8H A,1D8H B,1D8H C,1D8W A,1D8W B,1D8W C,1D8W D,1D9C A,1D9C B,1DBF A,1DBF B,1DBF C,1DBW A,1DBW B,1DCI A,1DCI B,1DCI C,1DCS A,1DD9 A,1DDJ A,1DDJ B,1DDJ C,1DDJ D,1DDW A,1DEK A,1DEK B,1DEU A,1DEU B,1DF4 A,1DFA A,1DG6 A,1DGF A,1DGF B,1DGF C,1DGF D,1DGW A,1DGW X,1DGW Y,1DHN A,1DI6 A,1DJ0 A,1DJ0 B,1DJ8 A,1DJ8 B,1DJ8 C,1DJ8 D,1DJ8 E,1DJ8 F,1DJL A,1DJL B,1DK8 A,1DKI A,1DKI B,1DKI C,1DKI D,1DL2 A,1DL5 A,1DL5 B,1DLW A,1DLY A,1DM9 A,1DM9 B,1DMG A,1DMH A,1DMH B,1DNL A,1DNU A,1DNU B,1DNU C,1DNU D,1DOI A,1DOS A,1DOS B,1DOW A,1DOW B,1DP4 A,1DP4 C,1DPG A,1DPG B,1DPJ A,1DPJ B,1DQG A,1DQI A,1DQI B,1DQI C,1DQI D,1DQN A,1DQN B,1DQS A,1DQS B,1DS1 A,1DSL A,1DTJ A,1DTJ B,1DTJ C,1DTJ D,1DUN A,1DUS A,1DVO A,1DW0 A,1DW0 B,1DW0 C,1DWK A,1DWK B,1DWK C,1DWK D,1DWK E,1DWK F,1DWK G,1DWK H,1DWK I,1DWK J,1DXE A,1DXE B,1DXG A,1DXG B,1DXY A,1DY5 A,1DY5 B,1DYK A,1DYP A,1DYQ A,1DYS A,1DYS B,1DZ3 A,1DZF A,1DZK A,1DZK B,1E0B A,1E0B B,1E0C A,1E0T A,1E0T B,1E0T C,1E0T D,1E19 A,1E19 B,1E1H A,1E1H B,1E1H C,1E1H D,1E25 A,1E29 A,1E2K A,1E2K B,1E2W A,1E2W B,1E4C P,1E4M M,1E58 A,1E5K A,1E5P A,1E5P B,1E5P C,1E5P D,1E6B A,1E6C A,1E6C B,1E6I A,1E6I P,1E6U A,1E7L A,1E7L B,1E7W A,1E7W B,1E8C A,1E8C B,1E8Y A,1E9G A,1E9G B,1E9W A,1EA5 A,1EAJ A,1EAJ B,1EAQ A,1EAQ B,1EAR A,1EAZ A,1EB6 A,1ECA A,1ECF A,1ECF B,1ECS A,1ECS B,1EDG A,1EDM B,1EDM C,1EDT A,1EE8 A,1EE8 B,1EER A,1EER B,1EER C,1EEX A,1EEX B,1EEX E,1EEX G,1EEX L,1EEX M,1EF8 A,1EF8 B,1EF8 C,1EFD N,1EG2 A,1EG3 A,1EG5 A,1EG5 B,1EGP A,1EGP B,1EH6 A,1EI5 A,1EJ0 A,1EJ2 A,1EJ8 A,1EJB A,1EJB B,1EJB C,1EJB D,1EJB E,1EJD A,1EJD B,1EJG A,1EK6 A,1EK6 B,1EKE A,1EKE B,1EKJ A,1EKJ B,1EKJ C,1EKJ D,1EKJ E,1EKJ F,1EKJ G,1EKJ H,1EKQ

A,1EKQ B,1EL6 A,1EL6 B,1EL6 C,1ELJ A,1ELK A,1ELK B,1ELU A,1ELU  
 B,1ELV A,1ELW A,1ELW B,1ELW C,1ELW D,1EMU A,1EMU B,1EN2 A,1ENF  
 A,1EOK A,1EP0 A,1EPW A,1EQ2 A,1EQ2 B,1EQ2 C,1EQ2 D,1EQ2 E,1EQ2  
 F,1EQ2 G,1EQ2 H,1EQ2 I,1EQ2 J,1EQ9 A,1EQ9 B,1ES5 A,1ES9 A,1ESW  
 A,1ET1 A,1ET1 B,1ET9 A,1ETL A,1ETM A,1ETN A,1EU1 A,1EU3 A,1EU3  
 B,1EU8 A,1EUH A,1EUH B,1EUH C,1EUH D,1EUW A,1EVL A,1EVL B,1EVL  
 C,1EVL D,1EVX A,1EVX B,1EVY A,1EW0 A,1EW4 A,1EWF A,1EX2 A,1EX2  
 B,1EX7 A,1EXR A,1EXT A,1EXT B,1EYE A,1EYH A,1EYQ A,1EYQ B,1EYV  
 A,1EYV B,1EZ3 A,1EZ3 B,1EZ3 C,1EZG A,1EZG B,1EZI A,1EZI B,1EZJ  
 A,1EZW A,1F00 I,1F08 A,1F08 B,1F0I A,1F0K A,1F0K B,1F0L A,1F0L B,1F0X  
 A,1F0X B,1F0Y A,1F0Y B,1F1E A,1F1M A,1F1M B,1F1M C,1F1M D,1F1U  
 A,1F1U B,1F20 A,1F2L A,1F2L B,1F2L C,1F2L D,1F2T A,1F2T B,1F32 A,1F39  
 A,1F39 B,1F3U A,1F3U B,1F3U C,1F3U D,1F3U E,1F3U F,1F3U G,1F3U  
 H,1F3Z A,1F46 A,1F46 B,1F4P A,1F5M A,1F5M B,1F5N A,1F5V A,1F5V  
 B,1F60 A,1F60 B,1F6B A,1F6B B,1F74 A,1F74 C,1F7D A,1F7D B,1F7L  
 A,1F7S A,1F86 A,1F86 B,1F94 A,1F9P A,1F9V A,1F9Z A,1F9Z B,1FAO  
 A,1FBT A,1FBT B,1FC3 A,1FC3 B,1FC3 C,1FC4 A,1FC4 B,1FC6 A,1FCQ  
 A,1FCY A,1FD3 A,1FD3 B,1FD3 C,1FD3 D,1FEC A,1FEC B,1FG7 A,1FGY  
 A,1FHG A,1FIP A,1FIP B,1FIP C,1FIP D,1FIT A,1FJ2 A,1FJ2 B,1FJH A,1FJH  
 B,1FJJ A,1FK5 A,1FKM A,1FL0 A,1FL2 A,1FM0 D,1FM0 E,1FMB A,1FMC  
 A,1FMC B,1FMJ A,1FMJ B,1FMK A,1FN9 A,1FN9 B,1FNF A,1FNN A,1FNN  
 B,1FO3 A,1FO8 A,1FOB A,1FP1 D,1FP2 A,1FP3 A,1FP3 B,1FPO A,1FPO  
 B,1FPO C,1FPZ A,1FPZ B,1FPZ C,1FPZ D,1FPZ E,1FPZ F,1FQI A,1FR3  
 A,1FR3 B,1FR3 C,1FR3 D,1FR3 E,1FR3 F,1FR3 G,1FR3 H,1FR3 I,1FR3  
 J,1FR3 K,1FR3 L,1FS5 A,1FS5 B,1FSG A,1FSG C,1FT5 A,1FTH A,1FTH  
 B,1FTH C,1FTR A,1FTR B,1FTR C,1FTR D,1FUK A,1FVG A,1FVI A,1FVM  
 A,1FVM B,1FVM C,1FVM D,1FVM E,1FVM F,1FVM G,1FVM H,1FVM I,1FVM  
 J,1FVM K,1FVM L,1FX2 A,1FXD A,1FXO A,1FXO B,1FXO C,1FXO D,1FXO  
 E,1FXO F,1FXO G,1FXO H,1FYE A,1FZQ A,1FZV A,1FZV B,1G0C A,1G0S  
 A,1G0S B,1G12 A,1G1J A,1G1J B,1G1T A,1G29 1,1G29 2,1G2B A,1G2N  
 A,1G2O A,1G2O B,1G2O C,1G2Q A,1G2Q B,1G2R A,1G2Y A,1G2Y B,1G2Y  
 C,1G2Y D,1G33 A,1G3K A,1G3K B,1G3K C,1G3P A,1G3Q A,1G4I A,1G55  
 A,1G57 A,1G57 B,1G5A A,1G5H A,1G5H B,1G5H C,1G5H D,1G5T A,1G60  
 A,1G60 B,1G61 A,1G61 B,1G66 A,1G6G A,1G6G B,1G6G E,1G6G F,1G6H  
 A,1G6U A,1G6U B,1G6X A,1G7S A,1G87 A,1G87 B,1G8A A,1G8E A,1G8E  
 B,1G8F A,1G8K A,1G8K B,1G8K C,1G8K D,1G8K E,1G8K F,1G8K G,1G8K  
 H,1G8L A,1G8L B,1G8M A,1G8M B,1G8Q A,1G8Q B,1G94 A,1G9W A,1G9W  
 B,1G9W C,1GA6 A,1GA6 I,1GA8 A,1GAI A,1GAK A,1GCI A,1GCI A,1GCI A,1GDE  
 A,1GDE B,1GEE A,1GEE B,1GEE E,1GEE F,1GEF A,1GEF B,1GEF D,1GEF  
 E,1GEQ A,1GEQ B,1GHE A,1GHE B,1GHG A,1GHG B,1GHG C,1GHG  
 D,1GHP A,1GK6 A,1GK6 B,1GK7 A,1GK9 A,1GK9 B,1GKM A,1GKP A,1GKP  
 B,1GKP C,1GKP D,1GKP E,1GKP F,1GL2 A,1GL2 B,1GL2 C,1GL2 D,1GL4  
 A,1GL4 B,1GMI A,1GMU A,1GMU B,1GMU C,1GMU D,1GMX A,1GNL A,1GNL  
 B,1GNL A,1GO3 E,1GO3 F,1GO3 M,1GO3 N,1GO6 A,1GO6 B,1GO6 C,1GO6  
 D,1GO6 E,1GO6 F,1GO6 G,1GO6 H,1GO6 I,1GO6 K,1GO6 M,1GO6 O,1GOI  
 A,1GOI B,1GP0 A,1GP1 A,1GP1 B,1GP6 A,1GPJ A,1GPP A,1GPR A,1GQ6  
 A,1GQ6 B,1GQ6 C,1GQ8 A,1GQA A,1GQA D,1GQE A,1GQV A,1GR0 A,1GR3  
 A,1GS5 A,1GS9 A,1GSA A,1GTE A,1GTE B,1GTE C,1GTE D,1GTK A,1GTT  
 A,1GTT B,1GTT C,1GTT D,1GTV A,1GTV B,1GTZ A,1GTZ B,1GTZ C,1GTZ  
 D,1GTZ E,1GTZ F,1GTZ G,1GTZ H,1GTZ I,1GTZ J,1GTZ K,1GTZ L,1GU2



A,1GU2 B,1GU7 A,1GU7 B,1GUD A,1GUD B,1GUI A,1GUQ A,1GUQ B,1GUQ C,1GUQ D,1GUT A,1GUT B,1GUT C,1GUT D,1GUT E,1GUT F,1GUX A,1GUX B,1GUX E,1GV2 A,1GV3 A,1GV3 B,1GV8 A,1GV9 A,1GVD A,1GVE A,1GVE B,1GVF A,1GVF B,1GVJ A,1GVJ B,1GVN A,1GVN B,1GVN C,1GVN D,1GVP A,1GVZ A,1GWE A,1GWM A,1GWU A,1GXJ A,1GXJ B,1GXM A,1GXM B,1GXQ A,1GXR A,1GXR B,1GXU A,1GXY A,1GXY B,1GY6 A,1GY6 B,1GY7 A,1GY7 B,1GY7 C,1GY7 D,1GY8 A,1GY8 B,1GY8 C,1GY8 D,1GYH A,1GYH B,1GYH C,1GYH D,1GYH E,1GYH F,1GYO A,1GYO B,1GYU A,1GYX A,1GYX B,1GZ2 A,1H03 P,1H03 Q,1H0B A,1H0B B,1H0H A,1H0H B,1H0H K,1H0H L,1H12 A,1H16 A,1H1N A,1H1N B,1H2B A,1H2B B,1H2E A,1H32 A,1H32 B,1H3F A,1H3F B,1H41 A,1H41 B,1H4A X,1H4X A,1H4X B,1H5Q A,1H5Q B,1H5Q C,1H5Q D,1H5Q E,1H5Q F,1H5Q G,1H5Q H,1H5Q I,1H5Q J,1H5Q K,1H5Q L,1H6H A,1H6K A,1H6K B,1H6K C,1H6K X,1H6K Y,1H6K Z,1H6T A,1H6U A,1H6W A,1H6W B,1H70 A,1H72 C,1H75 A,1H7C A,1H7E A,1H7E B,1H7S A,1H7S B,1H80 A,1H80 B,1H8P A,1H8P B,1H8U A,1H8U B,1H97 A,1H97 B,1H98 A,1H99 A,1H9M A,1H9M B,1HBK A,1HBN A,1HBN B,1HBN C,1HBN D,1HBN E,1HBN F,1HDH A,1HDH B,1HDK A,1HDO A,1HE7 A,1HFE L,1HFE M,1HFE S,1HFE T,1HFO A,1HFO B,1HFO C,1HFO D,1HFO E,1HFO F,1HG8 A,1HGX A,1HGX B,1HH3 A,1HH3 B,1HH3 C,1HH3 D,1HH8 A,1HHA A,1HHA B,1HHA C,1HHA D,1HHC A,1HHC B,1HHC C,1HHC D,1HHF A,1HHF B,1HHF C,1HHF D,1HHS A,1HHS B,1HHS C,1HHU A,1HHU B,1HHU C,1HHU D,1HHY A,1HHY B,1HHZ A,1HHZ B,1HHZ C,1HHZ D,1HHZ E,1HHZ F,1HJE A,1HLE A,1HLE B,1HLQ A,1HLQ B,1HLQ C,1HM9 A,1HM9 B,1HML A,1HN0 A,1HNJ A,1HO1 A,1HO1 B,1HO1 C,1HO1 D,1HP1 A,1HPC A,1HPC B,1HPI A,1HQ0 A,1HQJ A,1HQJ B,1HQJ C,1HQJ D,1HQJ E,1HQJ F,1HQJ G,1HQJ H,1HQJ I,1HQJ J,1HQJ K,1HQJ L,1HQS A,1HQS B,1HRU A,1HRU B,1HT6 A,1HTW A,1HTW B,1HTW C,1HUf A,1HUW A,1HW1 A,1HW1 B,1HX6 A,1HX6 B,1HX6 C,1HXH A,1HXH B,1HXH C,1HXH D,1HXI A,1HXM A,1HXR A,1HXR B,1HYE A,1HYO A,1HYO B,1HYP A,1HZ4 A,1HZ6 A,1HZ6 B,1HZ6 C,1HZT A,1I07 A,1I07 B,1I0R A,1I0R B,1I0V A,1I12 A,1I12 B,1I12 C,1I12 D,1I1J A,1I1J B,1I1N A,1I1W A,1I24 A,1I27 A,1I2H A,1I2K A,1I2T A,1I36 A,1I36 B,1I39 A,1I3C A,1I3C B,1I4J A,1I4J B,1I4U A,1I4U B,1I52 A,1I58 A,1I58 B,1I60 A,1I71 A,1I7K A,1I7K B,1I7N A,1I7N B,1I7Q A,1I7Q B,1I7Q C,1I7Q D,1I8A A,1I8D A,1I8D B,1I8D C,1I8F A,1I8F B,1I8F C,1I8F D,1I8F E,1I8F F,1I8F G,1I8O A,1I9G A,1I9S A,1I9Z A,1IA6 A,1IA9 A,1IA9 B,1IAE A,1IAP A,1IBY A,1IBY B,1IBY C,1IBY D,1ID0 A,1IDP A,1IDP B,1IDP C,1IFC A,1IFR A,1IG0 A,1IG0 B,1IGQ A,1IGQ B,1IGQ C,1IGQ D,1IHB A,1IHB B,1IHG A,1IHJ A,1IHJ B,1IHJ C,1IHJ D,1IHR A,1IHR B,1II2 A,1II2 B,1II5 A,1IIB A,1IIB B,1IJB A,1IJQ A,1IJQ B,1IJT A,1IJX A,1IJX B,1IJX C,1IJX D,1IJX E,1IJX F,1IJY A,1IJY B,1IK6 A,1IKO P,1IKP A,1IKT A,1ILK A,1ILT A,1ILT B,1IM5 A,1IN4 A,1INL A,1INL B,1INL C,1INL D,1IO0 A,1IO1 A,1IO2 A,1IO7 A,1IO7 B,1IOM A,1IOO A,1IOO B,1IPC A,1IQ4 A,1IQ4 B,1IQ6 A,1IQ6 B,1IQQ A,1IQZ A,1IRQ A,1IRQ B,1IS3 A,1ISP A,1ISU A,1ISU B,1IT2 A,1IT2 B,1ITT A,1ITT B,1ITT C,1ITU A,1ITU B,1ITV A,1ITV B,1ITX A,1IU1 A,1IU1 B,1IU8 A,1IU8 B,1IUJ A,1IUJ B,1IUK A,1IUQ A,1IV2 A,1IV2 B,1IV2 C,1IV2 D,1IV2 E,1IV2 F,1IX9 A,1IX9 B,1IXH A,1IXK A,1IXL A,1IY8 A,1IY8 B,1IY8 C,1IY8 D,1IY8 E,1IY8 F,1IY8 G,1IY8 H,1IYB A,1IYB B,1IYE A,1IYE B,1IYE C,1IYN A,1IZC A,1IZM A,1J09 A,1J0H A,1J0H B,1J0P A,1J1B A,1J1B B,1J1I A,1J1T A,1J24 A,1J27 A,1J2R A,1J2R B,1J2R C,1J2R D,1J30 A,1J30 B,1J34 A,1J34 B,1J34 C,1J3A A,1J3B A,1J3B B,1J3M A,1J3M B,1J3W A,1J3W B,1J3W C,1J3W D,1J48 A,1J48 B,1J4A

A,1J4A B,1J4A C,1J4A D,1J5P A,1J5U A,1J5W A,1J5W B,1J5X A,1J6O  
A,1J77 A,1J7X A,1J83 A,1J83 B,1J8B A,1J8E A,1J8M F,1J8R A,1J8U A,1J97  
A,1J97 B,1J98 A,1J99 A,1J9B A,1J9L A,1J9L B,1JAK A,1JAY A,1JAY B,1JB3  
A,1JBE A,1JBW A,1JC4 A,1JC4 B,1JC4 C,1JC4 D,1JCD A,1JCD B,1JCD  
C,1JCL A,1JCL B,1JD1 A,1JD1 B,1JD1 C,1JD1 D,1JD1 E,1JD1 F,1JD5 A,1JD5  
B,1JDC A,1JDP A,1JDP B,1JDP H,1JDW A,1JE0 A,1JE0 B,1JE0 C,1JE5  
A,1JE5 B,1JEK A,1JEK B,1JEO A,1JER A,1JET A,1JET B,1JF8 A,1JFB A,1JFL  
A,1JFL B,1JFU A,1JFU B,1JFX A,1JG1 A,1JGT A,1JGT B,1JH6 A,1JH6  
B,1JHC A,1JHF A,1JHF B,1JHG A,1JHJ A,1JHS A,1JI0 A,1JI1 A,1JI1 B,1JI7  
A,1JI7 B,1JI7 C,1JIG A,1JIG B,1JIG C,1JIG D,1JIX A,1JJF A,1JJV A,1JKE  
A,1JKE B,1JKE C,1JKE D,1JKG A,1JKG B,1JKM A,1JKM B,1JKX A,1JKX  
B,1JKX C,1JKX D,1JL0 A,1JL0 B,1JLJ A,1JLJ B,1JLJ C,1JM0 A,1JM0 B,1JM0  
C,1JM0 D,1JM0 E,1JM0 F,1JM1 A,1JMK C,1JMK O,1JMV A,1JMV B,1JMV  
C,1JMV D,1JMW A,1JND A,1JNI A,1JNR A,1JNR B,1JNR C,1JNR D,1JO0  
A,1JO0 B,1JO8 A,1JOH A,1JOH B,1JOS A,1JOV A,1JP4 A,1JPE A,1JQ0  
A,1JQ5 A,1JQE A,1JQE B,1JR2 A,1JR2 B,1JR7 A,1JR8 A,1JR8 B,1JRL  
A,1JS1 X,1JS1 Y,1JS1 Z,1JTV A,1JU2 A,1JU2 B,1JUH A,1JUH B,1JUH  
C,1JUH D,1JUV A,1JV1 A,1JV1 B,1JVB A,1JVV A,1JWQ A,1JX6 A,1JY1  
A,1JY2 N,1JY2 O,1JY2 P,1JY2 Q,1JY2 R,1JY2 S,1JYA A,1JYA B,1JYE  
A,1JYH A,1JYK A,1JYO A,1JYO B,1JYO C,1JYO D,1JYO E,1JYO F,1JZ8  
A,1JZ8 B,1JZ8 C,1JZ8 D,1JZT A,1JZT B,1K04 A,1K07 A,1K07 B,1K0E A,1K0E  
B,1K0R A,1K0R B,1K12 A,1K1B A,1K1E A,1K1E B,1K1E C,1K1E D,1K1E  
E,1K1E F,1K1E G,1K1E H,1K1E I,1K1E J,1K1E K,1K1E L,1K20 A,1K20  
B,1K2E A,1K2E B,1K2X A,1K2X B,1K2X C,1K2X D,1K32 A,1K32 B,1K32  
C,1K32 D,1K32 E,1K32 F,1K38 A,1K38 B,1K3I A,1K3S A,1K3S B,1K3Y  
A,1K3Y B,1K4I A,1K4M A,1K4M B,1K4M C,1K4N A,1K5C A,1K5N A,1K5N  
B,1K5N C,1K66 A,1K66 B,1K6D A,1K6D B,1K6K A,1K75 A,1K75 B,1K77  
A,1K7C A,1K7H A,1K7H B,1K7J A,1K7K A,1K8K A,1K8K B,1K8K C,1K8K  
D,1K8K E,1K8K F,1K8K G,1K92 A,1K94 A,1K94 B,1K9U A,1K9U B,1KA1  
A,1KAF A,1KAF B,1KAF C,1KAF D,1KAF E,1KAF F,1KB0 A,1KBL A,1KBV  
A,1KBV B,1KBV C,1KBV D,1KBV E,1KBV F,1KCM A,1KCQ A,1KDG A,1KDG  
B,1KEA A,1KEW A,1KEW B,1KEX A,1KFW A,1KGD A,1KGS A,1KHC A,1KHD  
A,1KHD B,1KHD C,1KHD D,1KHI A,1KHx A,1KHY A,1KHY B,1KHY C,1KHY  
D,1KI0 A,1KJQ A,1KJQ B,1KKO A,1KKO B,1KL9 A,1KLL A,1KLX A,1KM8  
A,1KMJ A,1KMO A,1KMT A,1KMT B,1KMV A,1KNC A,1KNC B,1KNC C,1KNG  
A,1KNM A,1KNQ A,1KNQ B,1KO7 A,1KO7 B,1KOE A,1KOL A,1KOL B,1KOP  
A,1KOP B,1KP6 A,1KP8 A,1KP8 B,1KP8 C,1KP8 D,1KP8 E,1KP8 F,1KP8  
G,1KP8 H,1KP8 I,1KP8 J,1KP8 K,1KP8 L,1KP8 M,1KP8 N,1KPG A,1KPG  
B,1KPG C,1KPG D,1KPT A,1KPT B,1KQ1 A,1KQ1 B,1KQ1 H,1KQ1 I,1KQ1  
K,1KQ1 M,1KQ1 N,1KQ1 R,1KQ1 S,1KQ1 T,1KQ1 W,1KQ1 Y,1KQ3 A,1KQ6  
A,1KQF A,1KQF B,1KQF C,1KQP A,1KQP B,1KQR A,1KR4 A,1KRH A,1KRH  
B,1KS8 A,1KS9 A,1KT6 A,1KTG A,1KTG B,1KU1 A,1KU1 B,1KU3 A,1KUX  
A,1KV9 A,1KVE A,1KVE B,1KVE C,1KVE D,1KW3 B,1KW4 A,1KWA A,1KWA  
B,1KWF A,1KWG A,1KWM A,1KWM B,1KWW A,1KWW B,1KWW C,1KXG  
A,1KXG B,1KXG C,1KXG D,1KXG E,1KXG F,1KXO A,1KYC A,1KYF A,1KYF  
P,1KZF A,1KZQ A,1KZQ B,1L1L A,1L1L B,1L1L C,1L1L D,1L1Q A,1L2H  
A,1L2P A,1L3I A,1L3I B,1L3I C,1L3I D,1L3I E,1L3I F,1L3K A,1L3P A,1L4X  
A,1L4X B,1L4X C,1L4X D,1L4X E,1L4X F,1L4X G,1L4X H,1L5W A,1L5W  
B,1L5X A,1L5X B,1L6P A,1L6R A,1L6R B,1L6S A,1L6S B,1L6W A,1L6W  
B,1L6W C,1L6W D,1L6W E,1L6W F,1L6W G,1L6W H,1L6W I,1L6W J,1L6X

A,1L6X B,1L7A A,1L7A B,1L7D A,1L7D B,1L7D C,1L7D D,1L8N A,1L8R  
A,1L8R B,1L9L A,1L9X A,1L9X B,1L9X C,1L9X D,1LAM A,1LB6 A,1LB6  
B,1LBU A,1LBV A,1LBV B,1LC0 A,1LC5 A,1LCF A,1LCY A,1LDD A,1LDD  
B,1LDD C,1LDD D,1LE6 A,1LE6 B,1LE6 C,1LED A,1LF7 A,1LFK A,1LFP  
A,1LFW A,1LG7 A,1LGP A,1LH0 A,1LH0 B,1LJ5 A,1LJ8 A,1LJ9 A,1LJ9  
B,1LJO A,1LKI A,1LKK A,1LKK B,1LKP A,1LL2 A,1LLD A,1LLD B,1LLF A,1LLF  
B,1LLN A,1LM5 A,1LM5 B,1LMI A,1LML A,1LNI A,1LNI B,1LO6 A,1LO7  
A,1LQ9 A,1LQ9 B,1LQA A,1LQA B,1LQT A,1LQT B,1LQV A,1LQV B,1LQV  
C,1LQV D,1LR0 A,1LR5 A,1LR5 B,1LR5 C,1LR5 D,1LR7 A,1LS1 A,1LSH  
A,1LSH B,1LSL A,1LST A,1LU0 A,1LU0 B,1LU4 A,1LUA A,1LUA B,1LUA  
C,1LUR A,1LUR B,1LUZ A,1LUZ B,1LV7 A,1LWB A,1LXI A,1LXJ A,1LY1  
A,1LY2 A,1LYQ A,1LYQ B,1LYV A,1LZL A,1M0D A,1M0D B,1M0D C,1M0D  
D,1M0K A,1M0U A,1M0U B,1M0W A,1M0W B,1M15 A,1M1F A,1M1F B,1M1H  
A,1M1Q A,1M1S A,1M22 A,1M22 B,1M24 A,1M24 B,1M2D A,1M2D B,1M2K  
A,1M2X A,1M2X B,1M2X C,1M2X D,1M3S A,1M3S B,1M3U A,1M3U B,1M3U  
C,1M3U D,1M3U E,1M3U F,1M3U G,1M3U H,1M3U I,1M3U J,1M3Y A,1M3Y  
B,1M3Y C,1M3Y D,1M40 A,1M45 A,1M45 B,1M48 A,1M48 B,1M4I A,1M4I  
B,1M4L A,1M55 A,1M55 B,1M5I A,1M5Q 1,1M5Q 2,1M5Q A,1M5Q B,1M5Q  
C,1M5Q D,1M5Q E,1M5Q F,1M5Q G,1M5Q H,1M5Q I,1M5Q J,1M5Q K,1M5Q  
L,1M5Q M,1M5Q N,1M5Q O,1M5Q P,1M5Q Q,1M5Q R,1M5Q S,1M5Q  
T,1M5Q U,1M5Q V,1M5Q W,1M5Q X,1M5Q Y,1M5Q Z,1M65 A,1M6D A,1M6D  
B,1M6S A,1M6S B,1M6S C,1M6S D,1M6Y A,1M6Y B,1M70 A,1M70 B,1M70  
C,1M70 D,1M8A A,1M8A B,1M93 A,1M93 B,1M93 C,1M9Z A,1MAI A,1MB3  
A,1MBA A,1MBM A,1MBM B,1MBM C,1MBM D,1MBY A,1MBY B,1MC2  
A,1MDC A,1MDO A,1ME8 A,1MF7 A,1MFG A,1MFG B,1MG4 A,1MG7 A,1MG7  
B,1MGP A,1MGQ A,1MGQ B,1MGQ C,1MGQ D,1MGQ E,1MGQ F,1MGQ  
G,1MGT A,1MH1 A,1MHN A,1MHW A,1MHW B,1MHW C,1MHW D,1MHW  
E,1MHW F,1MHW G,1MHW H,1MI3 A,1MI3 B,1MI3 C,1MI3 D,1MIX A,1MJ4  
A,1MJ5 A,1MJF A,1MJF B,1MJH A,1MJH B,1MJN A,1MK0 A,1MK4 A,1MK4  
B,1MKI A,1MKI B,1MKK A,1MKK B,1MKY A,1MKZ A,1MKZ B,1ML4 A,1ML9  
A,1MML A,1MN8 A,1MN8 B,1MN8 C,1MN8 D,1MO0 A,1MO0 B,1MO9 A,1MO9  
B,1MOF A,1MOQ A,1MP9 A,1MP9 B,1MPG A,1MPG B,1MPP A,1MPX  
A,1MPX B,1MPX C,1MPX D,1MQE A,1MQV A,1MQV B,1MRZ A,1MRZ  
B,1MSC A,1MTP A,1MTP B,1MTY B,1MTY C,1MTY D,1MTY E,1MTY G,1MTY  
H,1MUG A,1MUN A,1MUW A,1MV8 A,1MV8 B,1MV8 C,1MV8 D,1MVL  
A,1MVO A,1MW7 A,1MW9 X,1MWQ A,1MWQ B,1MX3 A,1MXG A,1MXR  
A,1MXR B,1MY7 A,1MY7 B,1MZ4 A,1MZ9 A,1MZ9 B,1MZ9 C,1MZ9 D,1MZ9  
E,1MZB A,1MZH A,1MZH B,1MZU A,1MZU B,1MZU C,1N08 A,1N08 B,1N0Q  
A,1N0Q B,1N0R A,1N12 A,1N12 B,1N12 C,1N12 D,1N13 A,1N13 B,1N13  
C,1N13 D,1N13 E,1N13 F,1N13 G,1N13 H,1N13 I,1N13 J,1N13 K,1N13  
L,1N1B A,1N1B B,1N1F A,1N2M A,1N2M B,1N2M C,1N2M D,1N2M E,1N2M  
F,1N2S A,1N2Z A,1N2Z B,1N3L A,1N40 A,1N45 A,1N45 B,1N57 A,1N5U  
A,1N62 A,1N62 B,1N62 C,1N62 D,1N62 E,1N62 F,1N67 A,1N71 A,1N71  
B,1N71 C,1N71 D,1N7E A,1N7H A,1N7H B,1N7K A,1N7K B,1N7O A,1N7S  
A,1N7S B,1N7S C,1N7S D,1N7Z A,1N7Z B,1N7Z C,1N7Z D,1N8V A,1N8V  
B,1N93 X,1N97 A,1N97 B,1N9L A,1N9P A,1NA0 A,1NA0 B,1NA3 A,1NA3  
B,1NAR A,1NB9 A,1NBA A,1NBA B,1NBA C,1NBA D,1NC5 A,1NC7 A,1NC7  
B,1NC7 C,1NC7 D,1NE2 A,1NE2 B,1NE7 A,1NE7 B,1NE7 C,1NE7 D,1NE7  
E,1NE7 F,1NEP A,1NEU A,1NF9 A,1NFF A,1NFF B,1NFN A,1NFP A,1NFV  
A,1NFV B,1NFV C,1NFV D,1NFV E,1NFV F,1NFV G,1NFV H,1NFV I,1NFV

J,1NFV K,1NFV L,1NFV M,1NFV N,1NFV O,1NFV P,1NG2 A,1NG6 A,1NH8  
 A,1NHS A,1NIG A,1NIJ A,1NJH A,1NJK A,1NJK B,1NJK C,1NJK D,1NJR  
 A,1NKD A,1NKI A,1NKI B,1NKO A,1NKR A,1NKZ A,1NKZ B,1NKZ C,1NKZ  
 D,1NKZ E,1NKZ F,1NL1 A,1NLF A,1NLF B,1NLF C,1NLQ A,1NLQ B,1NLQ  
 C,1NLQ D,1NLQ E,1NM2 A,1NM8 A,1NN5 A,1NNF A,1NNH A,1NNL A,1NNL  
 B,1NNW A,1NNW B,1NNX A,1NO5 A,1NO5 B,1NOA A,1NOG A,1NOT  
 A,1NOX A,1NP6 A,1NP6 B,1NP7 A,1NP7 B,1NP8 A,1NP8 B,1NPI A,1NPS  
 A,1NPY A,1NPY B,1NPY C,1NPY D,1NQ7 A,1NQ7 B,1NQJ A,1NQJ B,1NQU  
 A,1NQU B,1NQU C,1NQU D,1NQU E,1NQZ A,1NR0 A,1NR4 A,1NR4 B,1NR4  
 C,1NR4 D,1NR4 E,1NR4 F,1NR4 G,1NR4 H,1NRG A,1NRJ A,1NRJ B,1NRV  
 A,1NRV B,1NRW A,1NRZ A,1NRZ B,1NRZ C,1NRZ D,1NS5 A,1NS5 B,1NSC  
 A,1NSC B,1NSJ A,1NSZ A,1NSZ B,1NTH A,1NTV A,1NTV B,1NTY A,1NU0  
 A,1NU0 B,1NU4 A,1NU4 B,1NU5 A,1NUL A,1NUL B,1NUU A,1NUU B,1NUY  
 A,1NWA A,1NWW A,1NWW B,1NWZ A,1NXC A,1NXJ A,1NXJ B,1NXJ  
 C,1NXM A,1NXM B,1NXU A,1NXU B,1NYC A,1NYC B,1NYK A,1NYK B,1NZ0  
 A,1NZ0 B,1NZ0 C,1NZ0 D,1NZA A,1NZI A,1NZI B,1NZJ A,1NZN A,1O04  
 A,1O04 B,1O04 C,1O04 D,1O04 E,1O04 F,1O04 G,1O04 H,1O06 A,1O0S  
 A,1O0S B,1O0W A,1O0W B,1O0X A,1O13 A,1O1Y A,1O1Z A,1O20 A,1O22  
 A,1O2D A,1O2D B,1O3U A,1O4S A,1O4S B,1O4T A,1O4T B,1O4W A,1O4Y  
 A,1O50 A,1O54 A,1O5K A,1O5K B,1O5U A,1O5U B,1O5X A,1O5X B,1O63  
 A,1O63 B,1O69 A,1O69 B,1O6A A,1O6A B,1O6D A,1O6V A,1O6V B,1O75  
 A,1O75 B,1O7I A,1O7I B,1O7J A,1O7J B,1O7J C,1O7J D,1O7Q A,1O7Q  
 B,1O7Z A,1O7Z B,1O8V A,1O8X A,1O91 A,1O91 B,1O91 C,1O98 A,1O9G  
 A,1O9I A,1O9I B,1O9I C,1O9I D,1O9I E,1O9I F,1OA8 A,1OA8 B,1OA8 C,1OA8  
 D,1OAA A,1OAC A,1OAC B,1OAI A,1OAI B,1OAO A,1OAO B,1OAO C,1OAO  
 D,1OB4 A,1OB6 A,1OB6 B,1OB7 A,1OB8 A,1OB8 B,1OBB A,1OBB B,1OBO  
 A,1OBO B,1OC2 A,1OC2 B,1OC7 A,1OCK A,1OCK B,1OCY A,1OD3 A,1OD6  
 A,1ODK A,1ODK B,1ODK C,1ODK D,1ODK E,1ODK F,1ODM A,1ODO  
 A,1ODV A,1ODV B,1ODZ A,1ODZ B,1OE8 A,1OE8 B,1OEJ A,1OEY A,1OEY  
 A,1OEY B,1OEY C,1OEY D,1OEY J,1OEY K,1OEY L,1OEY M,1OF8 A,1OF8  
 B,1OFC X,1OFD A,1OFD B,1OFL A,1OFW A,1OFW B,1OFZ A,1OFZ B,1OGD  
 A,1OGD B,1OGD C,1OGD D,1OGD E,1OGO X,1OGQ A,1OH0 A,1OH0  
 B,1OH4 A,1OHL A,1OHP A,1OHP B,1OHP C,1OHP D,1OHT A,1OI0 A,1OI0  
 B,1OI0 C,1OI0 D,1OI2 A,1OI2 B,1OI6 A,1OI6 B,1OI7 A,1OIH A,1OIH B,1OIH  
 C,1OIH D,1OIS A,1OJH A,1OJH B,1OJH C,1OJH D,1OJH E,1OJH F,1OJH  
 G,1OJH H,1OJH I,1OJH J,1OJH K,1OJH L,1OJJ A,1OJJ B,1OJQ A,1OK0  
 A,1OKI A,1OKI B,1OKS A,1OLL A,1OLR A,1OLZ A,1OLZ B,1ON2 A,1ON2  
 B,1ON3 A,1ON3 B,1ON3 C,1ON3 D,1ON3 E,1ON3 F,1ONW A,1ONW B,1OO0  
 A,1OO0 B,1OOE A,1OOE B,1OOH A,1OOH B,1OOT A,1OPC A,1OPK A,1OQ1  
 A,1OQ1 B,1OQ1 C,1OQ1 D,1OQJ A,1OQJ B,1OQV A,1OQV B,1OQV  
 C,1OQW A,1OQW B,1OR0 A,1OR0 B,1OR0 C,1OR0 D,1OR7 A,1OR7 B,1OR7  
 C,1OR7 F,1ORR A,1ORR B,1ORR C,1ORR D,1ORU A,1ORU B,1OSD  
 A,1OSD B,1OSY A,1OSY B,1OTH A,1OTK A,1OTK B,1OU8 A,1OU8 B,1OU8  
 C,1OU8 D,1OU9 A,1OU9 B,1OU9 C,1OUV A,1OUW A,1OUW B,1OUW  
 C,1OUW D,1OV3 A,1OV3 B,1OV3 C,1OV3 D,1OW1 A,1OW4 A,1OW4  
 B,1OWL A,1OX0 A,1OX3 A,1OXJ A,1OXX K,1OYG A,1OYW A,1OZ2 A,1OZ9  
 A,1OZH A,1OZH B,1OZH C,1OZH D,1OZN A,1P0H A,1P0K A,1P0K B,1P0Z  
 A,1P0Z B,1P0Z C,1P0Z D,1P0Z E,1P0Z F,1P0Z G,1P0Z H,1P0Z I,1P0Z  
 J,1P15 A,1P15 B,1P1J A,1P1J B,1P1L A,1P1M A,1P2F A,1P3C A,1P3D  
 A,1P3D B,1P4C A,1P4O A,1P4O B,1P4P A,1P57 A,1P57 B,1P5D X,1P5Z

B,1P6O A,1P6O B,1P6X A,1P6X B,1P77 A,1P90 A,1P99 A,1P9A G,1P9B  
A,1P9G A,1P9H A,1P9I A,1PB7 A,1PBE A,1PBJ A,1PBW A,1PBW B,1PBY  
A,1PBY B,1PBY C,1PCF A,1PCF B,1PCF C,1PCF D,1PCF E,1PCF F,1PCF  
G,1PCF H,1PCH A,1PDO A,1PE9 A,1PE9 B,1PEF A,1PEN A,1PFB A,1PFB  
B,1PFZ A,1PFZ B,1PFZ C,1PFZ D,1PG4 A,1PG4 B,1PG6 A,1PGV A,1PGX  
A,1PII A,1PJ5 A,1PK3 A,1PK3 B,1PK3 C,1PKH A,1PKH B,1PKO A,1PL3  
A,1PL3 B,1PM1 X,1PM4 A,1PM4 B,1PM4 C,1PMH X,1PMI A,1PMM A,1PMM  
B,1PMM C,1PMM D,1PMM E,1PMM F,1PN0 A,1PN0 B,1PN0 C,1PN0 D,1PN2  
A,1PN2 B,1PN2 C,1PN2 D,1POC A,1POT A,1PP0 A,1PP0 B,1PP0 C,1PP0  
D,1PPR M,1PPR N,1PPR O,1PPY A,1PPY B,1PQ4 A,1PQ4 B,1PQ7 A,1PQH  
A,1PQH B,1PRZ A,1PSR A,1PSR B,1PSW A,1PT6 A,1PT6 B,1PTF A,1PTQ  
A,1PU6 A,1PU6 B,1PUC A,1PUI A,1PUI B,1PUJ A,1PUO A,1PUO B,1PV5  
A,1PVG A,1PVG B,1PVM A,1PVM B,1PVN A,1PVN B,1PVN C,1PVN D,1PWA  
A,1PWB A,1PWB B,1PWB C,1PX5 A,1PX5 B,1PXZ A,1PXZ B,1PY9 A,1PYF  
A,1PYO A,1PYO B,1PYO C,1PYO D,1PYO E,1PYO F,1PYZ A,1PYZ B,1PZ4  
A,1PZ7 A,1PZ7 B,1PZS A,1PZW A,1PZX A,1PZX B,1Q08 A,1Q08 B,1Q0P  
A,1Q0Q A,1Q0Q B,1Q0R A,1Q0U A,1Q0U B,1Q1A A,1Q1A B,1Q1F A,1Q1R  
A,1Q1R B,1Q1U A,1Q25 A,1Q2H A,1Q2H B,1Q2H C,1Q2Y A,1Q33 A,1Q35  
A,1Q3L A,1Q3L P,1Q3O A,1Q3O B,1Q42 A,1Q4U A,1Q4U B,1Q5D A,1Q5Y  
A,1Q5Y B,1Q5Y C,1Q5Y D,1Q5Z A,1Q6H A,1Q6H B,1Q6O A,1Q6O B,1Q6Z  
A,1Q74 A,1Q74 B,1Q74 C,1Q74 D,1Q7E A,1Q7F A,1Q7F B,1Q7L A,1Q7L  
B,1Q7L C,1Q7L D,1Q8B A,1Q8C A,1Q8D A,1Q8F A,1Q8F B,1Q8F C,1Q8F  
D,1Q8H A,1Q8I A,1Q9U A,1Q9U B,1QAD A,1QAH A,1QAH B,1QAU A,1QAZ  
A,1QB0 A,1QB7 A,1QBA A,1QBZ A,1QBZ B,1QBZ C,1QCS A,1QCX A,1QD1  
A,1QD1 B,1QD8 A,1QD8 B,1QDD A,1QE3 A,1QF8 A,1QF8 B,1QF9 A,1QFI  
A,1QFI B,1QFI C,1QFO A,1QFO B,1QFO C,1QFT A,1QFT B,1QGE D,1QGE  
E,1QGI A,1QGQ A,1QGV A,1QH4 A,1QH4 B,1QH4 C,1QH4 D,1QH5 A,1QH5  
B,1QHD A,1QHO A,1QHQ A,1QHV A,1QJ8 A,1QJC A,1QJC B,1QJP A,1QKK  
A,1QKR A,1QKR B,1QKS A,1QKS B,1QL3 A,1QL3 B,1QL3 C,1QL3 D,1QLW  
A,1QLW B,1QNR A,1QNX A,1QO2 A,1QO2 B,1QOW A,1QOW B,1QOW  
C,1QOW D,1QOW E,1QOW F,1QQ5 A,1QQ5 B,1QQF A,1QQP 1,1QQP  
2,1QQP 3,1QQP 4,1QR0 A,1QRE A,1QS1 A,1QS1 B,1QS1 C,1QS1 D,1QSA  
A,1QTN A,1QTN B,1QTN C,1QTN D,1QTN E,1QTN F,1QTN G,1QTN H,1QTN I,  
1QTN J,1QTN K,1QTN L,1QTN M,1QTN N,1QTN O,1QTN P,1QTN Q,1QTN R,  
1QTN S,1QTN T,1QTN U,1QTN V,1QTN W,1QTN X,1QTN Y,1QTN Z,1QU1  
A,1QU1 B,1QU1 C,1QU1 D,1QU1 E,1QU1 F,1QU1 G,1QU1 H,1QU1 I,1QU1 J,  
1QU1 K,1QU1 L,1QU1 M,1QU1 N,1QU1 O,1QU1 P,1QU1 Q,1QU1 R,1QU1 S,  
1QU1 T,1QU1 U,1QU1 V,1QU1 W,1QU1 X,1QU1 Y,1QU1 Z,1QU9 A,1QU9 B,  
1QU9 C,1QU9 D,1QU9 E,1QU9 F,1QU9 G,1QU9 H,1QU9 I,1QU9 J,1QU9 K,  
1QU9 L,1QU9 M,1QU9 N,1QU9 O,1QU9 P,1QU9 Q,1QU9 R,1QU9 S,1QU9 T,  
1QU9 U,1QU9 V,1QU9 W,1QU9 X,1QU9 Y,1QU9 Z,1QUP A,1QUP B,1QUS A,  
1QV1 A,1QVE A,1QVE B,1QW2 A,1QW9 A,1QW9 B,1QWD A,1QWD B,1QWG A,  
1QWI A,1QWI B,1QWI C,1QWI D,1QWK A,1QWO A,1QWR A,1QWR B,1QWY  
A,1QWZ A,1QX2 A,1QX2 B,1QXO A,1QXO B,1QXO C,1QXO D,1QXY A,1QYA  
A,1QYA B,1QZ1 A,1QZ9 A,1QZM A,1R0D A,1R0D B,1R0D C,1R0D D,1R0D E,  
1R0D F,1R0D G,1R0D H,1R0D I,1R0M A,1R0M B,1R0M C,1R0M D,1R0U A,  
1R0V A,1R0V B,1R0V C,1R0V D,1R17 A,1R17 B,1R17 C,1R17 D,1R1H A,  
1R1M A,1R1T A,1R1T B,1R26 A,1R29 A,1R2Q A,1R3D A,1R3F A,1R3S A,  
1R45 A,1R45 B,1R45 C,1R45 D,1R4V A,1R4X A,1R55 A,1R5L A,1R5M A,  
1R5Q A,1R5T A,1R5T B,1R5T C,1R5T D,1R62 A,1R69 A,1R6D A,1R6J A,  
1R6V A,1R6W A,1R6X A,1R75 A,1R77 A,1R77 B,1R7A A,1R7A B,1R7J A,  
1R7L A,1R7L B,1R85 A,1R88 A,1R88 B,1R89 A,1R8H A,1R8H B,1R8H C,  
1R8H D,1R8H E,1R8H F,1R8N A,1R8O A,1R8O B,1R9D A,1R9D B,1R9H A,  
1R9L A,1R9W A,1RA0 A,1RC9 A,1RCQ A,1REG X,1REG Y,1RF6 A,1RF6 B,  
1RF6 C,1RF6 D,1RFE A,1RFS A,1RFX A,1RFX B,1RFX C,1RFY A,1RFY B,  
1RG8 A,1RG8 B,1RGX A,1RGX B,1RGX C,1RH9 A,1RHC A,1RHF A,1RHF B,  
1RHS A,1RI6 A,1RIE A,1RIF A,1RIF B,1RJD A,1RJD B,1RJD C,1RJU V,  
1RK6 A,1RKI

A,1RKI B,1RKQ A,1RKQ B,1RKT A,1RKT B,1RKU A,1RKU B,1RL0 A,1RL6  
 A,1RLH A,1RLI A,1RLI B,1RLI C,1RLI D,1RLJ A,1RM6 A,1RM6 B,1RM6  
 C,1RM6 D,1RM6 E,1RM6 F,1RMG A,1RO2 A,1ROC A,1ROW A,1ROW  
 B,1RP0 A,1RP0 B,1RQB A,1RQP A,1RQP B,1RQP C,1RRK A,1RRM A,1RRM  
 B,1RSG A,1RSG B,1RSS A,1RT8 A,1RTQ A,1RTT A,1RU4 A,1RUT X,1RUW  
 A,1RW1 A,1RWH A,1RWJ A,1RWR A,1RWZ A,1RX0 A,1RX0 B,1RX0 C,1RX0  
 D,1RXD A,1RXD B,1RXD C,1RXQ A,1RXQ B,1RXQ C,1RXQ D,1RY6 A,1RY9  
 A,1RY9 B,1RY9 C,1RY9 D,1RYB A,1RYI A,1RYI B,1RYI C,1RYI D,1RYL  
 A,1RYL B,1RYO A,1RYP 1,1RYP 2,1RYP A,1RYP B,1RYP C,1RYP D,1RYP  
 E,1RYP F,1RYP G,1RYP H,1RYP I,1RYP J,1RYP K,1RYP L,1RYP M,1RYP  
 N,1RYP O,1RYP P,1RYP Q,1RYP R,1RYP S,1RYP T,1RYP U,1RYP V,1RYP  
 W,1RYP X,1RYP Y,1RYP Z,1RYQ A,1RZ2 A,1RZ3 A,1S0P A,1S0P B,1S12  
 A,1S12 B,1S12 C,1S12 D,1S1D A,1S1D B,1S1F A,1S21 A,1S29 A,1S2O  
 A,1S2W A,1S2X A,1S3Z A,1S3Z B,1S4K A,1S4K B,1S55 A,1S55 B,1S55  
 C,1S5A A,1S5A B,1S5A C,1S5A D,1S5P A,1S5P B,1S5U A,1S5U B,1S5U  
 C,1S5U D,1S5U E,1S5U F,1S5U G,1S5U H,1S67 L,1S67 U,1S68 A,1S6C  
 A,1S6C B,1S7I A,1S7K A,1S7Z A,1S8N A,1S96 A,1S96 B,1S99 A,1S99  
 B,1S9R A,1S9R B,1S9U A,1SAU A,1SBP A,1SBX A,1SBY A,1SBY B,1SBZ  
 A,1SBZ B,1SBZ C,1SBZ D,1SD4 A,1SD4 B,1SDI A,1SDO A,1SE0 A,1SE0  
 B,1SE8 A,1SEI A,1SEI B,1SEN A,1SF9 A,1SFF A,1SFF B,1SFF C,1SFF  
 D,1SFL A,1SFL B,1SFP A,1SFS A,1SFX A,1SFX B,1SG4 A,1SG4 B,1SG4  
 C,1SGJ A,1SGJ B,1SGJ C,1SGM A,1SGM B,1SGV A,1SGV B,1SGW A,1SH8  
 A,1SH8 B,1SHO A,1SHO B,1SHU X,1SJ1 A,1SJ1 B,1SJD A,1SJD B,1SJD  
 C,1SJD D,1SJN A,1SJN B,1SJN C,1SJW A,1SJY A,1SK4 A,1SK7 A,1SKZ  
 A,1SLM A,1SMO A,1SMO B,1SMX A,1SMX B,1SN9 A,1SN9 B,1SN9 C,1SN9  
 D,1SNG A,1SNN A,1SNN B,1SNY A,1SO7 A,1SOX A,1SOX B,1SPV A,1SQ9  
 A,1SQG A,1SQH A,1SQS A,1SQS B,1SQW A,1SR4 A,1SR4 B,1SR4 C,1SR8  
 A,1SRA A,1SRR A,1SRR B,1SRR C,1SRV A,1SS4 A,1SS4 B,1STM A,1STM  
 B,1STM C,1STM D,1STM E,1SU8 A,1SUM B,1SUR A,1SUU A,1SVB A,1SVF  
 A,1SVF B,1SVF C,1SVF D,1SVI A,1SVM A,1SVM B,1SVM C,1SVM D,1SVM  
 E,1SVM F,1SVY A,1SW5 A,1SW5 B,1SW5 C,1SW5 D,1SX7 A,1SXR A,1SXR  
 B,1SXV A,1SY7 A,1SY7 B,1SYY A,1SZ7 A,1SZH A,1SZH B,1SZN A,1SZO  
 A,1SZO B,1SZO C,1SZO D,1SZO E,1SZO F,1SZO G,1SZO H,1SZO I,1SZO  
 J,1SZO K,1SZO L,1SZW A,1SZW B,1T07 A,1T0B A,1T0B B,1T0B C,1T0B  
 D,1T0B E,1T0B F,1T0B G,1T0B H,1T0F A,1T0F B,1T0F C,1T0F D,1T0H  
 A,1T0H B,1T0I A,1T0I B,1T0T V,1T0T W,1T0T X,1T0T Y,1T0T Z,1T1E A,1T1G  
 A,1T1J A,1T1J B,1T1U A,1T1V A,1T1V B,1T2A A,1T2A B,1T2A C,1T2A  
 D,1T2W A,1T2W B,1T2W C,1T3Q A,1T3Q B,1T3Q C,1T3Q D,1T3Q E,1T3Q  
 F,1T3Y A,1T4A A,1T4A B,1T5I A,1T5O A,1T5O B,1T5O C,1T5O D,1T6C  
 A,1T6E X,1T6F A,1T6F B,1T6L A,1T6N A,1T6N B,1T6O A,1T6O B,1T6O  
 L,1T6S A,1T6S B,1T6T 1,1T6T 2,1T6U A,1T6U B,1T6U C,1T6U D,1T6U  
 E,1T6U F,1T6U G,1T6U H,1T6U I,1T6U J,1T6U K,1T6U L,1T7H A,1T7H  
 B,1T7L A,1T7L B,1T7V A,1T82 A,1T82 B,1T82 C,1T82 D,1T8H A,1T8K A,1T8T  
 A,1T8T B,1T92 A,1T92 B,1T9F A,1T9H A,1TA9 A,1TA9 B,1TAF A,1TAF  
 B,1TAZ A,1TBF A,1TC1 A,1TC1 B,1TC5 A,1TC5 B,1TC5 C,1TC5 D,1TCA  
 A,1TCV A,1TCV B,1TCV C,1TD4 A,1TE2 A,1TE2 B,1TE5 A,1TE5 B,1TEN  
 A,1TFE A,1TFZ A,1TG0 A,1TGR A,1TGR B,1TGX A,1TGX B,1TGX C,1TH7  
 A,1TH7 B,1TH7 C,1TH7 D,1TH7 E,1TH7 F,1TH7 G,1TH7 H,1TH7 I,1TH7  
 J,1TH7 K,1TH7 L,1TH7 M,1TH7 N,1THG A,1THM A,1THX A,1TIB A,1TIF  
 A,1TIG A,1TIQ A,1TIQ B,1TJB A,1TJB B,1TJL A,1TJL B,1TJL C,1TJL D,1TJL

E,1TJL F,1TJL G,1TJL H,1TJL I,1TJL J,1TJO A,1TJO B,1TJO C,1TJO D,1TJV  
A,1TJV B,1TJV C,1TJV D,1TK1 A,1TKE A,1TKI A,1TKI B,1TKJ A,1TKS  
A,1TKS B,1TL2 A,1TMX A,1TMX B,1TN3 A,1TOA A,1TOA B,1TOL A,1TOV  
A,1TP5 A,1TP5 B,1TP6 A,1TP9 A,1TP9 B,1TP9 C,1TP9 D,1TQ5 A,1TQG  
A,1TQH A,1TQJ A,1TQJ B,1TQJ C,1TQJ D,1TQJ E,1TQJ F,1TQY A,1TQY  
B,1TQY C,1TQY D,1TQY E,1TQY F,1TQY G,1TQY H,1TR0 A,1TR0 B,1TR0  
C,1TR0 D,1TR0 E,1TR0 F,1TR0 G,1TR0 H,1TR0 I,1TR0 J,1TR0 K,1TR0  
L,1TR0 M,1TR0 N,1TR0 O,1TR0 P,1TR0 R,1TR0 S,1TR0 T,1TR0 U,1TR0  
V,1TR0 W,1TR0 X,1TR0 Y,1TS9 A,1TT8 A,1TU1 A,1TU1 B,1TU7 A,1TU7  
B,1TU9 A,1TUA A,1TUH A,1TUK A,1TUO A,1TUV A,1TUW A,1TVD A,1TVD  
B,1TVF A,1TVF B,1TVG A,1TVN A,1TVN B,1TVX A,1TVX B,1TVX C,1TVX  
D,1TW9 A,1TW9 B,1TW9 C,1TW9 D,1TW9 E,1TW9 F,1TW9 G,1TW9 H,1TWD  
A,1TWD B,1TWI A,1TWI B,1TWI C,1TWI D,1TWU A,1TWY A,1TWY B,1TWY  
C,1TWY D,1TWY E,1TWY F,1TWY G,1TWY H,1TXG A,1TXG B,1TXJ A,1TXL  
A,1TXN A,1TXN B,1TXO A,1TXO B,1TY0 A,1TY0 B,1TY0 C,1TYJ A,1TZ0  
A,1TZ0 B,1TZ0 C,1TZJ A,1TZJ B,1TZJ C,1TZJ D,1TZP A,1TZP B,1TZV  
A,1U00 A,1U00 P,1U02 A,1U07 A,1U07 B,1U0K A,1U0K B,1U14 A,1U2H  
A,1U2K A,1U2P A,1U2W A,1U2W B,1U2W C,1U2W D,1U53 A,1U5D A,1U5D  
B,1U5D C,1U5D D,1U5F A,1U5H A,1U5K A,1U5K B,1U5P A,1U5U A,1U5U  
B,1U60 A,1U60 B,1U60 C,1U60 D,1U69 A,1U69 B,1U69 C,1U69 D,1U6E  
A,1U6E B,1U6K A,1U6K B,1U6K C,1U6T A,1U6Z A,1U6Z B,1U79 A,1U79  
B,1U79 C,1U79 D,1U79 E,1U7B A,1U7B B,1U7G A,1U7I A,1U7I B,1U7K  
A,1U7K B,1U7K C,1U7K D,1U7K E,1U7K F,1U7L A,1U7P A,1U7P B,1U7P  
C,1U7P D,1U84 A,1U8V A,1U8V B,1U8V C,1U8V D,1U94 A,1U9C A,1U9D  
A,1U9D B,1U9L A,1U9L B,1U9L C,1U9P A,1UA4 A,1UAI A,1UAN A,1UAN  
B,1UAR A,1UAS A,1UCD A,1UCR A,1UCR B,1UCS A,1UD9 A,1UD9 B,1UD9  
C,1UD9 D,1UEB A,1UEB B,1UEK A,1UF5 A,1UF5 B,1UFB A,1UFB B,1UFB  
C,1UFB D,1UFI A,1UFI B,1UFI C,1UFI D,1UFO A,1UFO B,1UFO C,1UFO  
D,1UFO E,1UFO F,1UFY A,1UG6 A,1UGI A,1UGI B,1UGI C,1UGI D,1UGI  
E,1UGI F,1UGI G,1UGI H,1UHA A,1UHE A,1UHE B,1UI0 A,1UII A,1UII B,1UIR  
A,1UIR B,1UIX A,1UIX B,1UJ0 A,1UJ0 B,1UJ2 A,1UJ2 B,1UJ6 A,1UJ8 A,1UJC  
A,1UJN A,1UJN B,1UJP A,1UK8 A,1UKF A,1UKK A,1UKK B,1UKU A,1ULK  
A,1ULK B,1ULR A,1UM0 A,1UM0 B,1UM0 C,1UM0 D,1UMD A,1UMD B,1UMD  
C,1UMD D,1UMZ A,1UMZ B,1UNO A,1UNO B,1UNQ A,1UOH A,1UOW  
A,1UOY A,1UOZ A,1UP9 A,1UPI A,1UPK A,1UPK B,1UPQ A,1UPS A,1UPS  
B,1UQT A,1UQT B,1UR1 A,1URR A,1URS A,1URS B,1US0 A,1US3 A,1US5  
A,1USC A,1USC B,1USE A,1USG A,1USM A,1USR A,1USR B,1UT1 A,1UT1  
B,1UT1 C,1UT1 D,1UT1 E,1UT1 F,1UT7 A,1UT7 B,1UTE A,1UTG A,1UTI  
A,1UTI D,1UUF A,1UUJ A,1UUJ B,1UUJ C,1UUJ D,1UUQ A,1UUY A,1UV7  
A,1UV7 B,1UW4 A,1UW4 B,1UW4 C,1UW4 D,1UWC A,1UWC B,1UWK  
A,1UWK B,1UWM A,1UWV A,1UWW A,1UWW B,1UX6 A,1UXO A,1UXX  
X,1UXY A,1UY4 A,1UYP A,1UYP B,1UYP C,1UYP D,1UYP E,1UYP F,1UZ3  
A,1UZ3 B,1UZK A,1UZM A,1UZM B,1V05 A,1V0A A,1V0L A,1V1H A,1V1H  
B,1V1H C,1V1H D,1V1H E,1V1H F,1V2D A,1V2X A,1V2Z A,1V30 A,1V33  
A,1V37 A,1V37 B,1V3W A,1V3Y A,1V3Y B,1V4A A,1V4F A,1V4F B,1V4F  
C,1V4P A,1V4P B,1V4P C,1V4V A,1V4V B,1V58 A,1V58 B,1V5D A,1V5D  
B,1V5V A,1V5V B,1V5X A,1V5X B,1V6P A,1V6P B,1V6Q A,1V6Q B,1V6Q  
C,1V6T A,1V6Z A,1V6Z B,1V70 A,1V74 A,1V74 B,1V76 A,1V76 B,1V77  
A,1V7H A,1V7H B,1V7H C,1V7L A,1V7L B,1V7R A,1V7W A,1V7Z A,1V7Z  
B,1V7Z C,1V7Z D,1V7Z E,1V7Z F,1V84 A,1V84 B,1V8C A,1V8C B,1V8C

C,1V8C D,1V8H A,1V8H B,1V8Y A,1V96 A,1V96 B,1V98 A,1V98 B,1V9F  
A,1V9K A,1V9K B,1V9M A,1V9Y A,1V9Y B,1VA0 A,1VA0 B,1VAJ A,1VAV  
A,1VAV B,1VBI A,1VBK A,1VBK B,1VBW A,1VC1 A,1VC1 B,1VC3 A,1VC3  
B,1VC4 A,1VC4 B,1VCA A,1VCA B,1VCC A,1VCD A,1VCD B,1VCH A,1VCH  
B,1VCH C,1VCH D,1VCH E,1VCL A,1VCL B,1VCT A,1VCV A,1VCV B,1VD6  
A,1VDW A,1VDW B,1VE0 A,1VE1 A,1VE2 A,1VE2 B,1VE4 A,1VEF A,1VEF  
B,1VEM A,1VF8 A,1VFJ A,1VFJ B,1VFJ C,1VFR A,1VFR B,1VFS A,1VFS  
B,1VFX A,1VG8 A,1VG8 B,1VG8 C,1VG8 D,1VGJ A,1VH4 A,1VH4 B,1VH5  
A,1VH5 B,1VHC A,1VHC B,1VHC C,1VHC D,1VHC E,1VHC F,1VHE A,1VHF  
A,1VHN A,1VHO A,1VHQ A,1VHQ B,1VHS A,1VHS B,1VHT A,1VHT B,1VHT  
C,1VHU A,1VHV A,1VHV B,1VHX A,1VHX B,1VHY A,1VHY B,1VIO A,1VIO  
B,1VI4 A,1VI6 A,1VI6 B,1VI6 C,1VI6 D,1VIA A,1VIA B,1VIM A,1VIM B,1VIM  
C,1VIM D,1VIO A,1VIO B,1VJ0 A,1VJ0 B,1VJ0 C,1VJ0 D,1VJ2 A,1VJ2 B,1VJE  
A,1VJE B,1VJK A,1VJL A,1VJL B,1VJN A,1VJN B,1VJO A,1VJU A,1VJU  
B,1VJV A,1VK1 A,1VK2 A,1VK4 A,1VK8 A,1VK8 B,1VK8 C,1VK8 D,1VKA  
A,1VKA B,1VKC A,1VKC B,1VKE A,1VKE B,1VKE C,1VKE D,1VKE E,1VKE  
F,1VKF A,1VKF B,1VKF C,1VKF D,1VKH A,1VKH B,1VKI A,1VKI B,1VKK  
A,1VKM A,1VKM B,1VKM C,1VKM D,1VKM E,1VKM F,1VKN A,1VKN B,1VKN  
C,1VKN D,1VKU A,1VKW A,1VKY A,1VKY B,1VL1 A,1VL2 A,1VL2 B,1VL2  
C,1VL2 D,1VL4 A,1VL4 B,1VL5 A,1VL5 B,1VL5 C,1VL5 D,1VL7 A,1VL7  
B,1VLA A,1VLA B,1VLA C,1VLA D,1VLG A,1VLG B,1VLG C,1VLG D,1VLG  
E,1VLG F,1VLG G,1VLG H,1VLJ A,1VLJ B,1VLO A,1VLP A,1VLP B,1VLP  
C,1VLP D,1VLR A,1VLR B,1VLY A,1VMA A,1VMA B,1VMB A,1VME A,1VME  
B,1VMG A,1VMH A,1VMJ A,1VP2 A,1VP2 B,1VP4 A,1VP4 B,1VP8 A,1VPB  
A,1VPD A,1VPH A,1VPH B,1VPH C,1VPH D,1VPH E,1VPH F,1VPK A,1VPM  
A,1VPM B,1VPM C,1VPR A,1VPT A,1VQ3 A,1VQ3 B,1VQ3 C,1VQ3 D,1VQQ  
A,1VQQ B,1VQS A,1VQS B,1VQS C,1VQS D,1VQS E,1VQT A,1VQU A,1VQU  
B,1VQZ A,1VR6 A,1VR6 B,1VR6 C,1VR6 D,1VR7 A,1VR7 B,1VR8 A,1VR9  
A,1VR9 B,1VRA A,1VRA B,1VRM A,1VRZ A,1VSR A,1VYB A,1VYB B,1VYF  
A,1VYI A,1VYK A,1VYR A,1VZI A,1VZI B,1VZM A,1VZM B,1VZM C,1VZY  
A,1VZY B,1W07 A,1W07 B,1W0D A,1W0D B,1W0D C,1W0D D,1W0H A,1W0N  
A,1W0P A,1W15 A,1W1H A,1W1H B,1W1H C,1W1H D,1W1O A,1W23 A,1W23  
B,1W27 A,1W27 B,1W2F A,1W2F B,1W2I A,1W2I B,1W2L A,1W2W A,1W2W  
B,1W2W E,1W2W F,1W2W I,1W2W J,1W2W M,1W2W N,1W2Y A,1W2Y  
B,1W32 A,1W32 B,1W3I A,1W3I B,1W3I C,1W3I D,1W3M A,1W3M B,1W3M  
C,1W3M D,1W3M E,1W3M F,1W3M G,1W3M H,1W3M I,1W3M J,1W3M  
K,1W3M L,1W41 A,1W4R A,1W4R B,1W4R C,1W4R D,1W4R E,1W4R  
F,1W4R G,1W4R H,1W4S A,1W4T A,1W4V A,1W4V B,1W4V C,1W4V  
D,1W4V E,1W4V F,1W53 A,1W5F A,1W5F B,1W5Q A,1W5Q B,1W5R A,1W5R  
B,1W5U A,1W5U B,1W5U C,1W5U D,1W66 A,1W6S A,1W6S B,1W6S  
C,1W6S D,1W6U A,1W6U B,1W6U C,1W6U D,1W70 A,1W70 B,1W70 C,1W70  
D,1W78 A,1W79 A,1W79 B,1W79 C,1W79 D,1W7C A,1W7J A,1W7J B,1W7Q  
A,1W7Q B,1W7Q C,1W7Q D,1W7Q E,1W7Q F,1W7R A,1W7R B,1W7R  
C,1W7R D,1W7R E,1W7R F,1W7R G,1W7R H,1W8K A,1W8O A,1W8S  
A,1W8S B,1W8S C,1W8S D,1W8S E,1W8S F,1W8S G,1W8S H,1W8S I,1W8S  
J,1W94 A,1W94 B,1W96 A,1W96 B,1W96 C,1W99 A,1W9A A,1W9A B,1W9E  
A,1W9E B,1W9E R,1W9E S,1W9E T,1W9H A,1W9I A,1W9S A,1W9S B,1WA3  
A,1WA3 B,1WA3 C,1WA3 D,1WA3 E,1WA3 F,1WAK A,1WB0 A,1WB0 B,1WB4  
A,1WB4 B,1WBA A,1WC2 A,1WC3 A,1WC3 B,1WCG A,1WCG B,1WCH  
A,1WCK A,1WCU A,1WCV 1,1WCW A,1WD3 A,1WD5 A,1WDC A,1WDC



B,1WDC C,1WDD A,1WDD E,1WDD S,1WDD W,1WDE A,1WDJ A,1WDJ  
 B,1WDJ C,1WDN A,1WDV A,1WDV B,1WDY A,1WEH A,1WEH B,1WER  
 A,1WF3 A,1WFB A,1WFB B,1WG8 A,1WG8 B,1WHI A,1WHS A,1WHS  
 B,1WHZ A,1WIW A,1WIW B,1WJ9 A,1WJX A,1WKA A,1WKC A,1WKO  
 A,1WKO B,1WKQ A,1WKQ B,1WKR A,1WKR I,1WKU A,1WKU B,1WKV  
 A,1WKV B,1WKY A,1WL8 A,1WLE A,1WLE B,1WLG A,1WLG B,1WLJ A,1WLT  
 A,1WLT B,1WLU A,1WLY A,1WLZ A,1WLZ B,1WLZ C,1WLZ D,1WM3  
 A,1WMA A,1WMD A,1WMH A,1WMH B,1WMS A,1WMS B,1WMW A,1WMW  
 B,1WMW C,1WMW D,1WMX A,1WMX B,1WN2 A,1WNA A,1WNY A,1WNY  
 B,1WOC A,1WOC B,1WOC C,1WOC D,1WOH A,1WOH B,1WOH C,1WOH  
 D,1WOH E,1WOH F,1WOL A,1WOQ A,1WOQ B,1WOS A,1WOU A,1WOV  
 A,1WOV B,1WOZ A,1WP5 A,1WPA A,1WPB A,1WPB B,1WPB C,1WPB  
 D,1WPB E,1WPB F,1WPB G,1WPB H,1WPB I,1WPB J,1WPB K,1WPB  
 L,1WPB M,1WPB N,1WPB O,1WPB P,1WPN A,1WPN B,1WPO A,1WPO  
 B,1WPV A,1WPV B,1WPV C,1WQ6 A,1WQ6 B,1WQ8 A,1WQA A,1WQA  
 B,1WQA C,1WQA D,1WQJ B,1WQJ I,1WR2 A,1WR8 A,1WR8 B,1WRA  
 A,1WRA B,1WRJ A,1WS0 A,1WS8 A,1WS8 B,1WS8 C,1WS8 D,1WSR  
 A,1WSR B,1WT6 A,1WT6 B,1WT6 D,1WTJ A,1WTJ B,1WU4 A,1WU9 A,1WU9  
 B,1WUB A,1WUR A,1WUR B,1WUR C,1WUR D,1WUR E,1WV3 A,1WV9  
 A,1WV9 B,1WVF A,1WVG A,1WVG B,1WVH A,1WVQ A,1WVQ B,1WVQ  
 C,1WVV A,1WVV B,1WWC A,1WWI A,1WWJ A,1WWJ B,1WWJ C,1WWJ  
 D,1WWK A,1WWK B,1WWR A,1WWR B,1WWR C,1WWR D,1WWZ A,1WWZ  
 B,1WX1 A,1WX1 B,1WXX A,1WXX B,1WXX C,1WXX D,1WY1 A,1WY1  
 B,1WY1 C,1WY2 A,1WY2 B,1WY3 A,1WYX A,1WYX B,1WZ3 A,1WZ3  
 B,1WZA A,1WZD A,1WZD B,1WZL A,1WZL B,1WZN A,1WZN B,1WZN  
 C,1WZO A,1WZO B,1WZO C,1WZO D,1WZZ A,1X0L A,1X0L B,1X0P A,1X0P  
 B,1X0P C,1X0P D,1X0P E,1X0P F,1X0P G,1X0P H,1X0P I,1X0P J,1X0T  
 A,1X13 A,1X13 B,1X1I A,1X1N A,1X1O A,1X1O B,1X1O C,1X2I A,1X2I  
 B,1X3K A,1X3S A,1X3X A,1X3X B,1X46 A,1X54 A,1X6I A,1X6I B,1X6O  
 A,1X6V A,1X6V B,1X6Z A,1X7D A,1X7D B,1X7V A,1X7V B,1X7V C,1X8B  
 A,1X8D A,1X8D B,1X8D C,1X8D D,1X8Q A,1X91 A,1X9D A,1X9I A,1X9I  
 B,1X9U A,1X9U B,1XA1 A,1XA1 B,1XA1 C,1XA1 D,1XAK A,1XAU A,1XAW  
 A,1XBI A,1XCR A,1XCR B,1XDN A,1XDW A,1XDZ A,1XE0 A,1XE0 B,1XE0  
 C,1XE0 D,1XE0 E,1XE0 F,1XE0 G,1XE0 H,1XE0 I,1XE0 J,1XE1 A,1XE7  
 A,1XE7 B,1XE7 C,1XED A,1XED B,1XED C,1XED D,1XED E,1XED F,1XEO  
 A,1XER A,1XFC A,1XFC B,1XFF A,1XFF B,1XFJ A,1XFK A,1XFS A,1XFS  
 B,1XG0 A,1XG0 B,1XG0 C,1XG0 D,1XG4 A,1XG4 B,1XG4 C,1XG4 D,1XG5  
 A,1XG5 B,1XG5 C,1XG5 D,1XG7 A,1XG7 B,1XGK A,1XGS A,1XGS B,1XGW  
 A,1XHD A,1XHK A,1XHK B,1XHN A,1XHN B,1XHN C,1XHN D,1XI3 A,1XI3  
 B,1XIO A,1XIY A,1XIY B,1XJT A,1XJU A,1XJU B,1XK7 A,1XK7 B,1XK7  
 C,1XKG A,1XKI A,1XKL A,1XKL B,1XKL C,1XKL D,1XKN A,1XKP A,1XKP  
 B,1XKP C,1XKR A,1XKW A,1XKY A,1XKY B,1XKY C,1XKY D,1XLQ A,1XLQ  
 B,1XLQ C,1XLY A,1XLY B,1XM3 A,1XM3 B,1XM3 C,1XM3 D,1XM8 A,1XM8  
 B,1XMC A,1XMC B,1XMK A,1XMT A,1XNF A,1XNF B,1XNG A,1XNG B,1XO5  
 A,1XO5 B,1XOC A,1XOC B,1XOD A,1XOD B,1XOV A,1XPH A,1XPP A,1XPP  
 B,1XPP C,1XPP D,1XQA A,1XQA B,1XQO A,1XRK A,1XRK B,1XRO A,1XRT  
 A,1XRT B,1XRU A,1XRU B,1XS1 A,1XS1 B,1XS1 C,1XS1 D,1XS1 E,1XS1  
 F,1XS5 A,1XSV A,1XSV B,1XSZ A,1XSZ B,1XT5 A,1XT8 A,1XT8 B,1XTE  
 A,1XTI A,1XTM A,1XTM B,1XTP A,1XTT A,1XTT B,1XTT C,1XTT D,1XU1  
 A,1XU1 B,1XU1 D,1XU1 R,1XU1 S,1XU1 T,1XU9 A,1XU9 B,1XU9 C,1XU9

D,1XUB A,1XV2 A,1XV2 B,1XV2 C,1XV2 D,1XV5 A,1XVW A,1XVW B,1XVX A,1XW3 A,1XW8 A,1XWL A,1XWV A,1XWV B,1XWY A,1XX6 A,1XX6 B,1XY1 A,1XY1 B,1XY2 A,1XYZ A,1XYZ B,1XZZ A,1Y02 A,1Y07 A,1Y07 B,1Y07 C,1Y07 D,1Y08 A,1Y0B A,1Y0B B,1Y0B C,1Y0B D,1Y0H A,1Y0H B,1Y0K A,1Y0M A,1Y0N A,1Y0P A,1Y0U A,1Y0U B,1Y0Y A,1Y0Y B,1Y12 A,1Y12 B,1Y12 C,1Y1P A,1Y1P B,1Y1X A,1Y1X B,1Y2K A,1Y2K B,1Y2M A,1Y2M B,1Y2M C,1Y2M D,1Y43 A,1Y43 B,1Y4C A,1Y4J A,1Y4J B,1Y4M A,1Y4M B,1Y4M C,1Y4W A,1Y55 X,1Y55 Y,1Y5E A,1Y5E B,1Y5E C,1Y5H A,1Y5H B,1Y60 A,1Y60 B,1Y60 C,1Y60 D,1Y60 E,1Y63 A,1Y66 A,1Y66 B,1Y66 C,1Y66 D,1Y6I A,1Y6X A,1Y6Z A,1Y6Z B,1Y71 A,1Y71 B,1Y79 1,1Y7P A,1Y7P B,1Y7P C,1Y7R A,1Y7R B,1Y7W A,1Y7W B,1Y7Y A,1Y7Y B,1Y80 A,1Y81 A,1Y88 A,1Y89 A,1Y89 B,1Y8A A,1Y93 A,1Y96 A,1Y96 B,1Y96 C,1Y96 D,1Y9I A,1Y9I B,1Y9I C,1Y9I D,1Y9L A,1Y9Q A,1Y9U A,1Y9W A,1Y9W B,1Y9Z A,1Y9Z B,1YAC A,1YAC B,1YAR A,1YAR B,1YAR C,1YAR D,1YAR E,1YAR F,1YAR G,1YAR H,1YAR I,1YAR J,1YAR K,1YAR L,1YAR M,1YAR N,1YAR O,1YAR P,1YAR Q,1YAR R,1YAR S,1YAR T,1YAR U,1YB0 A,1YB0 B,1YB0 C,1YB1 A,1YB1 B,1YB3 A,1YB5 A,1YB5 B,1YBK A,1YBK B,1YBK C,1YBK D,1YBX A,1YBX B,1YBY A,1YBY B,1YBZ A,1YC5 A,1YC5 B,1YC9 A,1YCD A,1YCD B,1YCK A,1YD0 A,1YD6 A,1YD6 B,1YD6 C,1YD6 D,1YDG A,1YDG B,1YDG C,1YDG D,1YDG E,1YDG F,1YDG G,1YDG H,1YDY A,1YDY B,1YE8 A,1YF9 A,1YF9 B,1YF9 C,1YFQ A,1YG9 A,1YGA A,1YGA B,1YGT A,1YH2 A,1YHF A,1YHT A,1YI9 A,1YIB A,1YIX A,1YIX B,1YJ7 A,1YJ7 B,1YJ7 C,1YJ7 D,1YJO A,1YJP A,1YKD A,1YKD B,1YKI A,1YKI B,1YKI C,1YKI D,1YKW A,1YKW B,1YLE A,1YLL A,1YLL B,1YLL C,1YLL D,1YLM A,1YLM B,1YLY A,1YLY B,1YM3 A,1YMT A,1YMT B,1YN3 A,1YN3 B,1YN4 A,1YN8 A,1YN8 B,1YN8 C,1YN8 D,1YN8 E,1YN8 F,1YN9 A,1YN9 B,1YN9 C,1YNB A,1YNB B,1YNB C,1YNF A,1YNF B,1YNF C,1YNF D,1YNF E,1YNF F,1YNP A,1YNP B,1YO3 A,1YO3 B,1YO3 C,1YOA A,1YOC A,1YOC B,1YOD A,1YOZ A,1YPF A,1YPH A,1YPQ A,1YPY A,1YQ2 A,1YQ5 A,1YQB A,1YQD A,1YQE A,1YQG A,1YQH A,1YQS A,1YQT A,1YR2 A,1YRB A,1YRK A,1YRR A,1YS1 X,1YS7 A,1YSP A,1YSQ A,1YSR A,1YT3 A,1YT8 A,1YTL A,1YU0 A,1YU5 X,1YUK A,1YUM A,1YUZ A,1YVR A,1YW4 A,1YW5 A,1YW9 A,1YWF A,1YWM A,1YX1 A,1YXM A,1YYA A,1YYH A,1YZ1 A,1YZF A,1YZM A,1YZV A,1Z02 A,1Z05 A,1Z06 A,1Z08 A,1Z0N A,1Z0P A,1Z0S A,1Z0W A,1Z1S A,1Z1Y A,1Z21 A,1Z2A A,1Z2N X,1Z2U A,1Z2W A,1Z3E A,1Z3X A,1Z41 A,1Z45 A,1Z47 A,1Z4E A,1Z4R A,1Z5R A,1Z5Z A,1Z67 A,1Z6M A,1Z6N A,1Z6O A,1Z70 X,1Z72 A,1Z7A A,1Z82 A,1Z8G A,1Z8O A,1Z96 A,1Z9L A,1Z9T A,1ZA0 A,1ZA4 A,1ZAI A,1ZAR A,1ZAV A,1ZB1 A,1ZBF A,1ZCE A,1ZCH A,1ZCJ A,1ZCZ A,1ZD0 A,1ZD8 A,1ZD9 A,1ZDN A,1ZDY A,1ZEI A,1ZEJ A,1ZEL A,1ZEM A,1ZFJ A,1ZGD A,1ZGK A,1ZGX A,1ZGZ A,1ZH2 A,1ZHS A,1ZHV A,1ZHX A,1ZI8 A,1ZJC A,1ZJJ A,1ZJR A,1ZK4 A,1ZK5 A,1ZKC A,1ZKE A,1ZKI A,1ZKL A,1ZKP A,1ZL0 A,1ZLD A,1ZLJ A,1ZLM A,1ZM8 A,1ZMA A,1ZMI A,1ZMM A,1ZMO A,1ZMT A,1ZN6 A,1ZN8 A,1ZOD A,1ZOW A,1ZPS A,1ZPV A,1ZPW X,1ZQ9 A,1ZR3 A,1ZR6 A,1ZRN A,1ZRU A,1ZS9 A,1ZSQ A,1ZSW A,1ZSX A,1ZSY A,1ZT3 A,1ZTD A,1ZTH A,1ZU4 A,1ZUD 1,1ZUH A,1ZUO A,1ZUU A,1ZUY A,1ZV1 A,1ZV8 A,1ZVA A,1ZVB A,1ZVT A,1ZWY A,1ZX8 A,1ZXK A,1ZXT A,1ZXX A,1ZY4 A,1ZY7 A,1ZZ1 A,1ZZG A,1ZZK A,1ZZM A,1ZZW A,2A0B A,2A14 A,2A15 A,2A1H A,2A1I A,2A1K A,2A26 A,2A28 A,2A2C A,2A2M A,2A2N A,2A2R A,2A35 A,2A38 A,2A3M A,2A3N A,2A4A A,2A4V A,2A50 A,2A5L A,2A61 A,2A65 A,2A67

A,2A6C A,2A6S A,2A6V A,2A6Y A,2A6Z A,2A72 A,2A7L A,2A8J A,2A8N  
 A,2A97 A,2A9D A,2A9I A,2A9S A,2AAL A,2AAN A,2AAO A,2AB0 A,2ABK  
 A,2ABS A,2ABW A,2ACF A,2ACV A,2AE0 X,2AE2 A,2AEB A,2AEE A,2AEF  
 A,2AEN A,2AEU A,2AEX A,2AG4 A,2AG5 A,2AGK A,2AH2 A,2AH5 A,2AH6  
 A,2AHF A,2AHN A,2AHU A,2AIB A,2AIO A,2AJ6 A,2AJ7 A,2AJG A,2AKF  
 A,2AKP A,2AKZ A,2AMH A,2AML A,2AN1 A,2ANX A,2AO9 A,2AP1 A,2AP3  
 A,2APJ A,2APO A,2APR A,2AQ5 A,2AQJ A,2AR1 A,2AR5 A,2ARC A,2ARP  
 A,2ARR A,2ARZ A,2AS0 A,2ASF A,2ASH A,2ASK A,2ASU A,2ATV A,2ATZ  
 A,2AU3 A,2AUW A,2AVD A,2AVT A,2AXC A,2AXI A,2AXO A,2AXQ A,2AXW  
 A,2AYD A,2AYH A,2AZ4 A,2AZW A,2B06 A,2B0A A,2B0C A,2B0P A,2B0T  
 A,2B0V A,2B18 A,2B1E A,2B1K A,2B1L A,2B1M A,2B1X A,2B1Y A,2B2H  
 A,2B3F A,2B3H A,2B3Y A,2B4H A,2B4L A,2B4V A,2B4W A,2B5A A,2B5W  
 A,2B61 A,2B69 A,2B78 A,2B7K A,2B7U A,2B82 A,2B8I A,2B8M A,2B8T  
 A,2B94 A,2B97 A,2B9D A,2B9E A,2B9L A,2B9W A,2BA2 A,2BAY A,2BB6  
 A,2BBA A,2BBE A,2BBH A,2BBR A,2BC0 A,2BC3 A,2BCE A,2BCM B,2BD0  
 A,2BDR A,2BEM A,2BEP A,2BEQ A,2BEZ C,2BF6 A,2BF9 A,2BFD A,2BFI  
 A,2BFW A,2BGK A,2BGS A,2BH4 X,2BH8 A,2BHG A,2BHU A,2BI0 A,2BI7  
 A,2BIB A,2BII A,2BJ0 A,2BJD A,2BJF A,2BJI A,2BJK A,2BJN A,2BJQ A,2BJR  
 A,2BJU A,2BK8 A,2BK9 A,2BKA A,2BKF A,2BKL A,2BKM A,2BKX A,2BKY  
 A,2BL0 A,2BL8 A,2BL9 A,2BLF A,2BLN A,2BM3 A,2BM5 A,2BMO A,2BNL  
 A,2BNM A,2BO4 A,2BOG X,2BON A,2BOU A,2BOY A,2BPD A,2BPT A,2BQ4  
 A,2BRF A,2BRY A,2BS2 A,2BSJ A,2BSY A,2BSZ A,2BT6 A,2BT9 A,2BTI  
 A,2BU3 A,2BUE A,2BV2 A,2BVF A,2BW0 A,2BW3 A,2BW4 A,2BW8 A,2BWF  
 A,2BWQ A,2BWR A,2BYC A,2BZ1 A,2BZ7 A,2BZL A,2BZV A,2C07 A,2C0A  
 A,2C0C A,2C0G A,2C0H A,2C0N A,2C0Z A,2C1I A,2C1L A,2C1X A,2C21  
 A,2C29 D,2C2A A,2C2I A,2C2N A,2C2P A,2C2U A,2C2X A,2C31 A,2C3F  
 A,2C3G A,2C3N A,2C41 A,2C42 A,2C43 A,2C46 A,2C4B A,2C4E A,2C4I  
 A,2C4J A,2C4M A,2C4N A,2C4W A,2C4X A,2C53 A,2C5A A,2C5Q A,2C60  
 A,2C61 A,2C6Q A,2C6U A,2C71 A,2C78 A,2C81 A,2C8M A,2C8S A,2C92  
 A,2C95 A,2C9J A,2CAL A,2CAR A,2CAY A,2CB1 A,2CB5 A,2CB8 A,2CB9  
 A,2CBP A,2CBZ A,2CC0 A,2CC6 A,2CCM A,2CCV A,2CCY A,2CDC A,2CDN  
 A,2CDO A,2CDU A,2CE0 A,2CE2 X,2CF7 A,2CFC A,2CFM A,2CFU A,2CG7  
 A,2CGQ A,2CH5 A,2CHC A,2CHO A,2CI1 A,2CI2 I,2CIA A,2CIS A,2CIU  
 A,2CIW A,2CJ4 A,2CJG A,2CJJ A,2CJL A,2CJS A,2CJT A,2CJZ A,2CKK  
 A,2CKL A,2CKS A,2CKX A,2CL3 A,2CM5 A,2CMG A,2CMP A,2CNQ A,2CO3  
 A,2COV D,2CPG A,2CS7 A,2CU3 A,2CU5 A,2CUA A,2CUK A,2CUL A,2CVB  
 A,2CVC A,2CVD A,2CVE A,2CVI A,2CVZ A,2CW2 A,2CW5 A,2CW9 A,2CWD  
 A,2CWQ A,2CWR A,2CWS A,2CWY A,2CWZ A,2CX1 A,2CX7 A,2CXA  
 A,2CXC A,2CXH A,2CXI A,2CXK A,2CXX A,2CXY A,2CY2 A,2CY3 A,2CY5  
 A,2CYE A,2CYJ A,2CYY A,2CZ2 A,2CZ4 A,2CZD A,2CZL A,2CZQ A,2CZS  
 A,2D0I A,2D0O A,2D1C A,2D1G A,2D1L A,2D1S A,2D1Y A,2D1Z A,2D28  
 C,2D29 A,2D2E A,2D2R A,2D37 A,2D39 A,2D3D A,2D3Y A,2D48 A,2D4P  
 A,2D4U A,2D4X A,2D58 A,2D59 A,2D5B A,2D5C A,2D5F A,2D5M A,2D5W  
 A,2D68 A,2D69 A,2D7V A,2D81 A,2D8D A,2DB7 A,2DBB A,2DBN A,2DBQ  
 A,2DBY A,2DC0 A,2DC1 A,2DC3 A,2DC4 A,2DDF A,2DDR A,2DDX A,2DE3  
 A,2DE6 A,2DEB A,2DEJ A,2DFA A,2DG1 A,2DGA A,2DHO A,2DJI A,2DKA  
 A,2DKH A,2DKJ A,2DKN A,2DKO A,2DKV A,2DLB A,2DM6 A,2DM9 A,2DOK  
 A,2DP9 A,2DPF A,2DPL A,2DPM A,2DPQ A,2DPR A,2DQL A,2DQW A,2DR1  
 A,2DR3 A,2DRE A,2DRI A,2DS2 A,2DS5 A,2DSC A,2DSJ A,2DSK A,2DST  
 A,2DSX A,2DSY A,2DT4 A,2DT8 A,2DTC A,2DTJ A,2DTR A,2DTX A,2DUL

A,2DUR A,2DUY A,2DVK A,2DVM A,2DWC A,2DWK A,2DWU A,2DXA  
 A,2DXQ A,2DXU A,2DY0 A,2DY1 A,2DYI A,2DYJ A,2DYK A,2DYO A,2DYU  
 A,2E01 A,2E0N A,2E0T A,2E11 A,2E12 A,2E1F A,2E1N A,2E1V A,2E1Z  
 A,2E26 A,2E2O A,2E2R A,2E3D A,2E3H A,2E3I A,2E3N A,2E3V A,2E4T  
 A,2E56 A,2E5F A,2E5Y A,2E6F A,2E6M A,2E6X A,2E7V A,2E7Y A,2E7Z  
 A,2E85 A,2E8B A,2E8E A,2E8G A,2E9L A,2E9Y A,2EA7 A,2EAB A,2EAQ  
 A,2EAY A,2EB1 A,2EB4 A,2EBB A,2EBF X,2EBJ A,2EBN A,2EBO A,2ECE  
 A,2ECU A,2ED6 A,2EEN A,2EF0 A,2EF5 A,2EF8 A,2EFJ A,2EFR A,2EFV  
 A,2EGD A,2EGJ A,2EGO A,2EGV A,2EGZ A,2EH3 A,2EH6 A,2EHG A,2EHH  
 A,2EHP A,2EHZ A,2EI5 A,2EI9 A,2EIG A,2EIX A,2EII A,2EJ5 A,2EJ8 A,2EJ9  
 A,2EJA A,2EJN A,2EJW A,2EK0 A,2EK1 A,2EK8 A,2EKC A,2EKG A,2EKL  
 A,2EKP A,2ELA A,2ELC A,2END A,2ENG A,2EO4 A,2EO5 A,2EPI A,2EPL  
 X,2EQ6 A,2ERF A,2ERL A,2ERV A,2ERW A,2ES9 A,2ESS A,2ET1 A,2ETB  
 A,2ETJ A,2ETV A,2EU9 A,2EV1 A,2EVA A,2EVB A,2EVE A,2EW0 A,2EW2  
 A,2EWF A,2EWH A,2EWT A,2EX2 A,2EX4 A,2EYU A,2EZ1 A,2F01 A,2F02  
 A,2F0C A,2F1F A,2F1K A,2F1N A,2F22 A,2F23 A,2F2B A,2F2E A,2F2H  
 A,2F46 A,2F4M A,2F4P A,2F4Q A,2F4W A,2F51 A,2F5G A,2F5T X,2F5X  
 A,2F60 K,2F62 A,2F68 X,2F69 A,2F6E A,2F6R A,2F6U A,2F71 A,2F7B A,2F7V  
 A,2F8A A,2F8Y A,2F9F A,2F9H A,2F9I A,2F9L A,2F9N A,2F9W A,2FA1  
 A,2FA5 A,2FA8 A,2FAO A,2FAZ A,2FB5 A,2FB6 A,2FBA A,2FBD A,2FBH  
 A,2FBN A,2FBO J,2FBQ A,2FCF A,2FCJ A,2FCK A,2FCL A,2FCO A,2FCR  
 A,2FCT A,2FCW A,2FD4 A,2FD5 A,2FDN A,2FDR A,2FDV A,2FE3 A,2FE5  
 A,2FE7 A,2FEA A,2FEF A,2FEX A,2FF4 A,2FFU A,2FFY A,2FG1 A,2FGQ  
 X,2FH1 A,2FH7 A,2FHF A,2FHP A,2FHQ A,2FHT A,2FHZ A,2FI1 A,2FI9  
 A,2FIP A,2FIU A,2FJ8 A,2FJR A,2FK5 A,2FK8 A,2FK9 A,2FKB A,2FKK A,2FL4  
 A,2FLH A,2FLI A,2FM9 A,2FMA A,2FMD A,2FN0 A,2FN9 A,2FNA A,2FNO  
 A,2FNU A,2FO3 A,2FOM A,2FOZ A,2FP1 A,2FP7 A,2FPE A,2FPH X,2FPQ  
 A,2FPR A,2FQ3 A,2FQ4 A,2FQP A,2FQX A,2FR1 A,2FR2 A,2FR5 A,2FRE  
 A,2FRG P,2FS2 A,2FSH A,2FSJ A,2FSQ A,2FSR A,2FSU A,2FSX A,2FT0  
 A,2FTR A,2FTX A,2FU0 A,2FU4 A,2FUE A,2FUJ A,2FUK A,2FUL A,2FUP  
 A,2FUR A,2FVH A,2FVV A,2FVY A,2FW5 A,2FWH A,2FWM X,2FWT A,2FWV  
 A,2FX5 A,2FXQ A,2FY6 A,2FY7 A,2FYF A,2FYG A,2FYX A,2FZP A,2FZS  
 A,2FZV A,2G0C A,2G0I A,2G0W A,2G1U A,2G29 A,2G2C A,2G2D A,2G2N  
 A,2G2S A,2G30 A,2G3A A,2G3B A,2G3F A,2G3R A,2G3W A,2G40 A,2G50  
 A,2G5C A,2G5D A,2G5G X,2G5X A,2G62 A,2G64 A,2G6F X,2G6Y A,2G76  
 A,2G7B A,2G7C A,2G7O A,2G7S A,2G84 A,2G8S A,2G9W A,2G9Z A,2GA1  
 A,2GA8 A,2GAG A,2GAI A,2GAK A,2GAS A,2GAU A,2GAX A,2GB4 A,2GBW  
 A,2GCU A,2GDM A,2GDQ A,2GDZ A,2GE7 A,2GEC A,2GEN A,2GEY A,2GF0  
 A,2GF3 A,2GF6 A,2GFF A,2GFH A,2GFN A,2GFO A,2GFQ A,2GG6 A,2GGC  
 A,2GGO A,2GGS A,2GH9 A,2GHA A,2GHS A,2GHT A,2GI3 A,2GIA A,2GIB  
 A,2GIY A,2GJ3 A,2GJ4 A,2GJ8 A,2GJL A,2GK4 A,2GKE A,2GKG A,2GKM  
 A,2GKP A,2GL5 A,2GL9 A,2GLZ A,2GMQ A,2GMW A,2GMY A,2GN0 A,2GN4  
 A,2GNC A,2GNO A,2GNP A,2GOM A,2GOP A,2GPE A,2GPI A,2GPY A,2GQ0  
 A,2GQ1 A,2GQR A,2GQT A,2GQW A,2GR8 A,2GRC A,2GS4 A,2GS5 A,2GS8  
 A,2GSO A,2GSV A,2GT1 A,2GTR A,2GU1 A,2GU3 A,2GU9 A,2GUD A,2GUF  
 A,2GUH A,2GUI A,2GUK A,2GUX A,2GUZ A,2GVI A,2GVK A,2GW4 A,2GWG  
 A,2GWM A,2GWN A,2GXG A,2GXQ A,2GYQ A,2GYZ A,2GZ4 A,2GZ6 A,2GZB  
 A,2GZQ A,2GZS A,2GZV A,2H00 A,2H0U A,2H1C A,2H1R A,2H1T A,2H1V  
 A,2H29 A,2H2B A,2H2T B,2H30 A,2H3G X,2H3H A,2H3L A,2H4P A,2H4V  
 A,2H57 A,2H58 A,2H5C A,2H6D A,2H6E A,2H6F A,2H6L A,2H6U A,2H7C

A,2H7O A,2H7W A,2H88 A,2H8E A,2H8G A,2H8L A,2H8O A,2H98 A,2H9A  
 A,2H9U A,2HA8 A,2HAL A,2HAZ A,2HBA A,2HBG A,2HBO A,2HBV A,2HBW  
 A,2HC1 A,2HC8 A,2HC9 A,2HCF A,2HCM A,2HD9 A,2HDO A,2HDV A,2HDW  
 A,2HDZ A,2HEK A,2HES X,2HEU A,2HEW F,2HF1 A,2HF2 A,2HF9 A,2HFK  
 A,2HFN A,2HFS A,2HHC A,2HHG A,2HHP A,2HHZ A,2HI0 A,2HI4 A,2HIN  
 A,2HIQ A,2HIY A,2HJE A,2HJH A,2HJN A,2HJP A,2HJV A,2HKE A,2HKJ  
 A,2HKU A,2HKV A,2HL7 A,2HLC A,2HLJ A,2HLR A,2HLS A,2HLV A,2HLY  
 A,2HM7 A,2HMH A,2HMZ A,2HNF A,2HNG A,2HNL A,2HNU A,2HO1 A,2HO2  
 A,2HOQ A,2HOX A,2HPG A,2HPJ A,2HPS A,2HPV A,2HPW A,2HQ4 A,2HQ7  
 A,2HQ9 A,2HQH A,2HQL A,2HQQ A,2HQS A,2HQT A,2Hqv A,2Hqx A,2Hqy  
 A,2HRA A,2HRV A,2HRZ A,2HS1 A,2HSA B,2HSB A,2HSI A,2HSJ A,2HSZ  
 A,2HT9 A,2HTA A,2HTD A,2HTS A,2HU9 A,2HUF A,2HUH A,2HUJ A,2HUO  
 A,2HVW A,2HW2 A,2HW4 A,2HWV A,2HX0 A,2HX5 A,2HXI A,2HXP A,2HXS  
 A,2HXV A,2HY1 A,2HY5 A,2HY7 A,2HYK A,2HYT A,2HYX A,2HZC A,2HZF  
 A,2HZL A,2HZQ A,2I02 A,2I0K A,2I0O A,2I0Z A,2I24 N,2I2C A,2I2O A,2I2W  
 A,2I33 A,2I3D A,2I3H A,2I49 A,2I4L A,2I4S A,2I51 A,2I53 A,2I5F A,2I5H A,2I5I  
 A,2I5U A,2I5V O,2I61 A,2I6D A,2I6H A,2I6J A,2I6V A,2I71 A,2I74 A,2I7A  
 A,2I7C A,2I7F A,2I7G A,2I87 A,2I8B A,2I8D A,2I8T A,2I9A A,2I9C A,2I9F A,2I9I  
 A,2I9W A,2I9X A,2IA1 A,2IA7 A,2IAB A,2IAI A,2IAY A,2IB0 A,2IB8 A,2IBD  
 A,2IBL A,2IBN A,2IBP A,2IC2 A,2IC6 A,2IC9 A,2ICG A,2ICH A,2ICI A,2ICT  
 A,2ICU A,2ICY A,2ID3 A,2ID4 A,2ID6 A,2IDL A,2IDR A,2IEA A,2IEL A,2IEQ  
 A,2IEW A,2IF5 A,2IF6 A,2IFC A,2IFR A,2IFX A,2IG6 A,2IG8 A,2IGI A,2IGP  
 A,2IGT A,2IGX A,2IHD A,2IHT A,2IHY A,2II1 A,2II2 A,2IIA A,2IID A,2IJ2 A,2IJA  
 A,2IJQ A,2IKB A,2IKK A,2IKS A,2ILR A,2IM8 A,2IM9 A,2IMF A,2IMH A,2IMI  
 A,2IMJ A,2IML A,2IMQ X,2IMR A,2IMS A,2IMZ A,2IN0 A,2IN3 A,2INU A,2INW  
 A,2ION A,2IP1 A,2IP2 A,2IP6 A,2IPI A,2IQJ A,2IQY A,2IRU A,2IS8 A,2IS9  
 A,2ISB A,2ISM A,2ISN A,2ISW A,2ISY A,2IT2 A,2IT9 A,2IU1 A,2IU4 A,2IU5  
 A,2IUH A,2IUM A,2IUW A,2IVF A,2IVN A,2IVX A,2IVY A,2IW0 A,2IW1 A,2IW2  
 A,2IWA A,2IWB A,2IWK A,2IWN A,2IWQ A,2IWR A,2IXC A,2IXD A,2IXE  
 A,2IXS A,2IXT A,2IY2 A,2IY9 A,2IYA A,2IYJ A,2IYV A,2IZ6 A,2IZQ A,2IZR  
 A,2IZX A,2IZZ A,2J05 A,2J07 A,2J0A A,2J0V A,2J13 A,2J1A A,2J1P A,2J1V  
 A,2J23 A,2J2J A,2J32 A,2J3X A,2J43 A,2J4D A,2J4X A,2J5Y A,2J66 A,2J6A  
 A,2J6B A,2J6F A,2J6L A,2J6V A,2J6Y A,2J73 A,2J7J A,2J7T A,2J82 A,2J89  
 A,2J8B A,2J8G A,2J8H A,2J8K A,2J8M A,2J8W A,2J91 A,2J97 A,2J9O A,2J9U  
 A,2J9W A,2JA2 A,2JAE A,2JAF A,2JAH A,2JAM A,2JAY A,2JBM A,2JBV  
 A,2JC4 A,2JC5 A,2JC9 A,2JCB A,2JD4 A,2JDA A,2JDC A,2JDI A,2JDJ A,2JE3  
 A,2JE6 A,2JE8 A,2JEK A,2JEN A,2JEP A,2JER A,2JFN A,2JFR A,2JG0  
 A,2JG6 A,2JGB A,2JGN A,2JGP A,2JGS A,2JH1 A,2JH3 A,2JHF A,2JHN  
 A,2JIF A,2JIG A,2JII A,2JIK A,2JIL A,2JIS A,2JJN A,2JJQ A,2JJU A,2JKB  
 A,2JKG A,2JKS A,2JKU A,2JL1 A,2JLI A,2JLJ A,2JLP A,2JLQ A,2KIN A,2LHB  
 A,2LIG A,2LIS A,2LTN A,2MCM A,2MHR A,2MLT A,2MSB A,2NAC A,2NLR  
 A,2NLS A,2NLV A,2NML A,2NN5 A,2NNU A,2NO4 A,2NOG A,2NP5 A,2NPN  
 A,2NPT A,2NQ3 A,2NQ5 A,2NQL A,2NQT A,2NQW A,2NR4 A,2NR5 A,2NR7  
 A,2NRK A,2NRR A,2NRT A,2NS9 A,2NSA A,2NSF A,2NSZ A,2NT0 A,2NT8  
 A,2NTE A,2NTP A,2NUH A,2NUJ A,2NV0 A,2NVA A,2NVO A,2NW2 A,2NW8  
 A,2NWF A,2NWH A,2NWV A,2NX2 A,2NX4 A,2NX8 A,2NX9 A,2NXC A,2NXF  
 A,2NXV A,2NXW A,2NYC A,2NYI A,2NYN A,2NYU A,2NZ7 A,2NZC A,2NZL  
 A,2NZX A,2O04 A,2O07 A,2O08 A,2O0A A,2O0B A,2O0J A,2O0M A,2O0Q  
 A,2O0R A,2O0Y A,2O16 A,2O1A A,2O1B A,2O1C A,2O1K A,2O1Q A,2O20  
 A,2O23 A,2O28 A,2O2G A,2O2K A,2O2P A,2O2X A,2O30 A,2O34 A,2O36

A,2O38 A,2O3F A,2O4D A,2O4J A,2O4T A,2O4V A,2O4X A,2O57 A,2O5F  
 A,2O5H A,2O5U A,2O5V A,2O62 A,2O66 A,2O6F A,2O6L A,2O6N A,2O6P  
 A,2O6X A,2O6Y A,2O70 A,2O71 A,2O7A A,2O7I A,2O7M A,2O7R A,2O7S  
 A,2O8L A,2O8N A,2O8P A,2O8Q A,2O90 A,2O99 A,2O9G A,2O9S A,2O9U  
 X,2OA2 A,2OA9 A,2OAF A,2OAI A,2OB0 A,2OB3 A,2OB5 A,2OBI A,2OBL  
 A,2OBP A,2OC3 A,2OC6 A,2OCG A,2OCH A,2OCT A,2OCZ A,2OD0 A,2OD4  
 A,2OD5 A,2OD6 A,2ODA A,2ODF A,2ODH A,2ODK A,2ODL A,2ODP A,2OE3  
 A,2OEB A,2OEE A,2OEM A,2OER A,2OEZ A,2OF3 A,2OFC A,2OFK A,2OFY  
 A,2OFZ A,2OG2 A,2OG4 A,2OG5 A,2OG9 A,2OGF A,2OGI A,2OGT A,2OH1  
 A,2OH3 A,2OHH A,2OHW A,2OIB A,2OIF A,2OIK A,2OIT A,2OIW A,2OIX  
 A,2OIZ D,2OJ6 A,2OJH A,2OKF A,2OKG A,2OKM A,2OKQ A,2OKT A,2OKU  
 A,2OKV A,2OKX A,2OKZ A,2OL9 A,2OLG A,2OLM A,2OLN A,2OLR A,2OLT  
 A,2OLW A,2OLX A,2OMD A,2OMK A,2OML A,2OMM A,2OMO A,2OMP  
 A,2OMQ A,2ON9 A,2ONF A,2ONV A,2ONW X,2ONX A,2OO2 A,2OO3  
 A,2OOA A,2OOC A,2OOJ A,2OOK A,2OOQ A,2OPC A,2OPG A,2OPJ A,2OPO  
 A,2OPW A,2OQ0 A,2OQ1 A,2OQ5 A,2OQB A,2OQG A,2OQK A,2OQM  
 A,2OQQ A,2OQZ A,2OR7 A,2ORD A,2ORW A,2OS0 A,2OS5 A,2OSA A,2OSO  
 A,2OSV A,2OSX A,2OT9 A,2OTM A,2OU1 A,2OU3 A,2OU5 A,2OU6 A,2OUS  
 A,2OUW A,2OV0 A,2OV9 A,2OVG A,2OVJ A,2OVS A,2OWA A,2OWN  
 A,2OWP A,2OX6 A,2OX7 A,2OX9 A,2OXC A,2OXG Z,2OXL A,2OXO A,2OY7  
 A,2OY9 A,2OYA A,2OYC A,2OYO A,2OYR A,2OYZ A,2OZE A,2OZG A,2OZH  
 A,2OZJ A,2OZN A,2OZT A,2OZV A,2P02 A,2P08 A,2P09 A,2P0A A,2P0B  
 A,2P0D A,2P0K A,2P0N A,2P0S A,2P0W A,2P12 A,2P13 A,2P14 A,2P17  
 A,2P18 A,2P1M A,2P1T A,2P23 A,2P25 A,2P26 A,2P2O A,2P2S A,2P2V  
 A,2P2W A,2P35 A,2P38 A,2P39 A,2P3E A,2P3H A,2P3P A,2P3W A,2P3Y  
 A,2P4E P,2P4F A,2P4H X,2P4O A,2P4P A,2P51 A,2P57 A,2P58 A,2P5K  
 A,2P5M A,2P5Q A,2P5V A,2P5X A,2P5Y A,2P65 A,2P67 A,2P6H A,2P6V  
 A,2P6W A,2P6X A,2P6Y A,2P6Z A,2P7I A,2P7O A,2P84 A,2P8B A,2P8E  
 A,2P8G A,2P8I A,2P8J A,2P8T A,2P92 A,2P97 A,2P9B A,2P9H A,2P9W  
 A,2P9X A,2PA1 A,2PA4 A,2PA7 A,2PA8 D,2PAG A,2PB7 A,2PBC A,2PBF  
 A,2PBI A,2PBK A,2PBL A,2PBP A,2PBR A,2PC1 A,2PCJ A,2PCN A,2PD1  
 A,2PD6 A,2PDR A,2PE4 A,2PE8 A,2PEB A,2PEF A,2PEQ A,2PET A,2PF5  
 A,2PFB A,2PFI A,2PFW A,2PFX A,2PFY A,2PFZ A,2PG0 A,2PGE A,2PGF  
 A,2PGO A,2PGW A,2PH0 A,2PHN A,2PI2 A,2PIA A,2PIE A,2PIJ A,2PJS  
 A,2PJZ A,2PK3 A,2PK8 A,2PKE A,2PKF A,2PKH A,2PL1 A,2PLC A,2PLI  
 A,2PLJ A,2PLN A,2PLR A,2PLW A,2PMA A,2PMK A,2PMU A,2PN0 A,2PN1  
 A,2PN2 A,2PN6 A,2PN8 A,2PND A,2PNE A,2PNQ A,2PNW A,2PO4 A,2POC  
 A,2POF A,2POI A,2POK A,2POR A,2POS A,2PPN A,2PPQ A,2PPT A,2PPV  
 A,2PPX A,2PQ3 A,2PQ7 A,2PQ8 A,2PQQ A,2PQV A,2PQX A,2PR5 A,2PR7  
 A,2PRD A,2PRV A,2PRX A,2PS1 A,2PS2 A,2PSD A,2PSP A,2PST X,2PT6  
 A,2PTT A,2PU3 A,2PU9 A,2PUL A,2PUY A,2PUZ A,2PV2 A,2PV4 A,2PV7  
 A,2PVB A,2PVQ A,2PVU A,2PW0 A,2PWA A,2PWQ A,2PWW A,2PWY  
 A,2PXX A,2PY2 A,2PYQ A,2PYT A,2PYW A,2PYX A,2PZ0 A,2PZE A,2PZH  
 A,2PZM A,2Q03 A,2Q09 A,2Q0D A,2Q0L A,2Q0O A,2Q0S A,2Q0T A,2Q0Y  
 A,2Q0Z X,2Q12 A,2Q1S A,2Q24 A,2Q2F A,2Q2G A,2Q2H A,2Q30 A,2Q35  
 A,2Q3E A,2Q3G A,2Q3M A,2Q3P A,2Q3T A,2Q3V A,2Q3W A,2Q3X A,2Q3Z  
 A,2Q40 A,2Q43 A,2Q46 A,2Q48 A,2Q4F A,2Q4H A,2Q4M A,2Q4O A,2Q4V  
 A,2Q4W A,2Q4Z A,2Q52 A,2Q5C A,2Q5W E,2Q5X A,2Q62 A,2Q6F A,2Q6K  
 A,2Q6Q A,2Q73 A,2Q79 A,2Q7B A,2Q7D A,2Q7S A,2Q7V A,2Q7W A,2Q7X  
 A,2Q82 A,2Q87 A,2Q88 A,2Q8K A,2Q8N A,2Q8P A,2Q8R E,2Q8X A,2Q99

A,2Q9K A,2Q9O A,2Q9R A,2Q9U A,2Q9V A,2QA1 A,2QAP A,2QB7 A,2QBW  
 A,2QCK A,2QCP X,2QCU A,2QCV A,2QDE A,2QDJ A,2QE6 A,2QE8 A,2QE9  
 A,2QEB A,2QEC A,2QED A,2QEE A,2QEU A,2QF4 A,2QF7 A,2QF9 A,2QFA  
 A,2QFE A,2QFF A,2QFL A,2QG1 A,2QG3 A,2QG8 A,2QGM A,2QGG A,2QGS  
 A,2QGU A,2QGY A,2QH9 A,2QHF A,2QHK A,2QHL A,2QHP A,2QHQ A,2QHS  
 A,2QHT A,2QIB A,2QIF A,2QIH A,2QIK A,2QIP A,2QIW A,2QIY A,2QJ2  
 A,2QJ8 A,2QJL A,2QJV A,2QJW A,2QJX A,2QJZ A,2QK1 A,2QKD A,2QKH  
 B,2QKP A,2QKV A,2QL8 A,2QLT A,2QLW A,2QLX A,2QM0 A,2QM6 A,2QM8  
 A,2QMA A,2QML A,2QMM A,2QMQ A,2QN0 A,2QN4 A,2QND A,2QNG A,2QNI  
 A,2QNK A,2QNL A,2QNT A,2QO4 A,2QOL A,2QOR A,2QP2 A,2QPN A,2QPQ  
 A,2QPW A,2QPX A,2QPZ A,2QQ4 A,2QQ5 A,2QQ8 A,2QQI A,2QQM A,2QQY  
 A,2QQZ A,2QR3 A,2QR6 A,2QR7 A,2QRR A,2QRT A,2QRU A,2QRW A,2QS9  
 A,2QSA A,2QSB A,2QSI A,2QSK A,2QSQ A,2QSW A,2QSX A,2QT1 A,2QTD  
 A,2QTF A,2QTF A,2QTS A,2QTT A,2QU0 A,2QUL A,2QUO A,2QUP A,2QUY  
 A,2QV5 A,2QV6 A,2QVE A,2QVG A,2QVK A,2QW5 A,2QWU A,2QX2 A,2QXI  
 A,2QXX A,2QXY A,2QY1 A,2QY6 A,2QYC A,2QYW A,2QZC A,2QZQ A,2QZT  
 A,2QZU A,2R01 A,2R09 A,2R0B A,2R0C A,2R0H A,2R0X A,2R0Y A,2R16  
 A,2R1I A,2R25 A,2R2A A,2R2C A,2R2D A,2R2I A,2R2N A,2R2O A,2R2Y  
 A,2R2Z A,2R31 A,2R32 A,2R37 A,2R3A A,2R3B A,2R44 A,2R47 A,2R4F  
 A,2R4G A,2R4I A,2R4Q A,2R58 A,2R5O A,2R5T A,2R5U A,2R60 A,2R6J  
 A,2R6O A,2R6Q A,2R6U A,2R6V A,2R6Z A,2R75 1,2R78 A,2R7D A,2R7G  
 A,2R7H A,2R85 A,2R8E A,2R8O A,2R8Q A,2R8U A,2R8W A,2R91 A,2R9F  
 A,2RA4 A,2RA6 A,2RA8 A,2RA9 A,2RAF A,2RAG A,2RAS A,2RAU A,2RB7  
 A,2RB8 A,2RB9 A,2RBB A,2RBC A,2RBD A,2RBG A,2RBK A,2RC3 A,2RC8  
 A,2RCC A,2RCI A,2RCZ A,2RDC A,2RDE A,2RDG A,2RDI A,2RDM A,2RDQ  
 A,2RDX A,2RDZ A,2RE2 A,2REE A,2REK A,2REM A,2REU A,2REY A,2RF0  
 A,2RFA A,2RFF A,2RFM A,2RFQ A,2RFR A,2RFV A,2RG4 A,2RG8 A,2RGQ  
 A,2RH0 A,2RH2 A,2RH3 A,2RH7 A,2RHF A,2RHK A,2RHM A,2RHW A,2RI0  
 A,2RI7 A,2RI9 A,2RIE A,2RIJ A,2RIK A,2RIL A,2RIN A,2RIQ A,2RJ2 A,2RJI  
 A,2RK3 A,2RK5 A,2RK9 A,2RKH A,2RKL A,2RKN A,2RKQ A,2RKV A,2RKY  
 A,2RL8 A,2RLD A,2RSP A,2SAK A,2SCP A,2SHP A,2SLI A,2SN3 A,2SPC  
 A,2SQC A,2TGI A,2TNF A,2TPS A,2UU8 A,2UUQ A,2UUR A,2UUU A,2UV4  
 A,2UVK A,2UVO A,2UWA A,2UWI A,2UX9 A,2UXT A,2UXW A,2UY2 A,2UYO  
 A,2UYT A,2UZ0 A,2V03 A,2V05 A,2V09 A,2V0C A,2V0H A,2V0P A,2V0U  
 A,2V1M A,2V1O A,2V1Q A,2V1X A,2V25 A,2V27 A,2V2F A,2V2G A,2V2K  
 A,2V33 A,2V3G A,2V3I A,2V3S A,2V3U A,2V3V A,2V3Z A,2V40 A,2V4B  
 A,2V4N A,2V4V A,2V4X A,2V57 A,2V5M A,2V5T A,2V62 A,2V6K A,2V6U  
 A,2V6V A,2V6X A,2V75 A,2V76 A,2V78 A,2V79 A,2V7F A,2V7K A,2V7S  
 A,2V84 A,2V89 A,2V8F A,2V8H A,2V8I A,2V8T A,2V94 A,2V9K A,2V9L  
 A,2V9R A,2V9T A,2V9V A,2VAC A,2VAP A,2VB1 A,2VBF A,2VBK A,2VBU  
 A,2VC8 A,2VCH A,2VCL A,2VCN A,2VD8 A,2VDF A,2VDJ A,2VE8 A,2VEC  
 A,2VEF A,2VEZ A,2VFK A,2VFO A,2VFR A,2VFX A,2VG0 A,2VG9 A,2VGA  
 A,2VH7 A,2VHA A,2VHJ A,2VHK A,2VIF A,2VIM A,2VJW A,2VK2 A,2VK8  
 A,2VKJ A,2VKL A,2VKP A,2VLG A,2VLI A,2VLQ A,2VM5 A,2VM9 A,2VMH  
 A,2VN4 A,2VN6 A,2VNF A,2VNG A,2VNL A,2VO8 A,2VO9 A,2VOF A,2VOK  
 A,2VOS A,2VOV A,2VOZ A,2VPA A,2VPB A,2VPH A,2VPJ A,2VPK A,2VPN  
 A,2VPT A,2VQ2 A,2VQ3 A,2VQ9 A,2VQG A,2VQM A,2VQP A,2VQR A,2VQX  
 A,2VRI A,2VRQ A,2VRS A,2VS0 A,2VSD A,2VSV A,2VT1 A,2VT3 A,2VTC  
 A,2VTF A,2VTW A,2VU9 A,2VUN A,2VUV A,2VVE A,2VVG A,2VVK A,2VVM  
 A,2VVP A,2VWW A,2VW8 A,2VWR A,2VWS A,2VXG A,2VXN A,2VXR A,2VXZ

A,2VY8 A,2VYO A,2VYW A,2VZ5 A,2VZC A,2VZP A,2VZS A,2VZY A,2W0B  
A,2W0G A,2W0I A,2W0M A,2W0P A,2W15 A,2W18 A,2W1J A,2W1N A,2W1R  
A,2W1S A,2W1V A,2W20 A,2W2A A,2W2J A,2W2R A,2W31 A,2W39 A,2W3G  
A,2W3J A,2W3P A,2W3Q A,2W3X A,2W3Y A,2W3Z A,2W40 A,2W43 A,2W47  
A,2W4E A,2W4F A,2W50 A,2W53 A,2W59 A,2W5A A,2W5E A,2W5F A,2W5Q  
A,2W5W A,2W5Y A,2W61 A,2W6A A,2W6K A,2W7A A,2W7Q A,2W7Z A,2W86  
A,2W87 A,2W8N A,2W8T A,2W8X A,2W91 A,2W9H A,2W9X A,2W9Y A,2WA7  
A,2WAA A,2WAG A,2WAN A,2WAO A,2WAW A,2WB0 X,2WB3 A,2WB6  
A,2WB9 A,2WBF X,2WBM A,2WBN A,2WBQ A,2WBX A,2WCE A,2WCI  
A,2WCJ A,2WCO A,2WCR A,2WCU A,2WCW A,2WDC A,2WDS A,2WE5  
A,2WEI A,2WEU A,2WF7 A,2WFB A,2WFH A,2WFI A,2WFO A,2WFP A,2WV  
A,2WFW A,2WG7 A,2WGK A,2WGP A,2WH7 A,2WHL A,2WI8 A,2WIY A,2WJ5  
A,2WJ9 A,2WJE A,2WJN C,2WJR A,2WK1 A,2WKJ A,2WKK A,2WKQ  
A,2WKX A,2WL1 A,2WLC A,2WLR A,2WLU A,2WM3 A,2WM5 A,2WM8  
A,2WMF A,2WN3 A,2WN4 A,2WN9 A,2WNF A,2WNH A,2WNK A,2WNP  
F,2WNS A,2WNW A,2WNX A,2WNY A,2WO1 A,2WOE A,2WOJ A,2WOL  
A,2WOY A,2WP7 A,2WPG A,2WPH E,2WPV A,2WQ4 A,2WQF A,2WQI  
A,2WQK A,2WQR A,2WR8 A,2WRA A,2WRY A,2WSB A,2WSD A,2WSH  
A,2WT0 A,2WTA A,2WTE A,2WTG A,2WTM A,2WTP A,2WU9 A,2WUG  
A,2WUJ A,2WUQ A,2WUR A,2WUX A,2WV3 A,2WVF A,2WVI A,2WVQ  
A,2WW4 A,2WW5 A,2WW6 A,2WW8 A,2WWE A,2WXF A,2WXU A,2WY3  
A,2WY4 A,2WYA A,2WYH A,2WYQ A,2WZ1 A,2WZ8 A,2WZ9 A,2WZB  
A,2WZM A,2WZO A,2WZV A,2X02 A,2X0K A,2X0Q A,2X1B A,2X1D A,2X26  
A,2X2S A,2X2U A,2X32 A,2X36 A,2X3C A,2X3E A,2X3G A,2X3H A,2X3J  
A,2X3L A,2X3M A,2X3N A,2X46 A,2X49 A,2X4D A,2X4J A,2X4K A,2X4L  
A,2X55 A,2X5C A,2X5F A,2X5H A,2X5N A,2X5O A,2X5P A,2X5R A,2X5X  
A,2X5Y A,2X61 A,2X6U A,2X6W A,2X78 A,2X7K A,2X7M A,2X7Q A,2X7R  
A,2X8H A,2X8S A,2X8X X,2X98 A,2X9G A,2X9O A,2X9X A,2X9Z A,2XAU  
A,2XB0 X,2XB4 A,2XBG A,2XBK A,2XBL A,2XBT A,2XBU A,2XC1 A,2XCI  
A,2XCJ A,2XCZ A,2XD3 A,2XDC A,2XDG A,2XDH A,2XDJ A,2XDP A,2XDW  
A,2XE4 A,2XED A,2XEP A,2XET A,2XEU A,2XEV A,2XEX A,2XF7 A,2XFD  
A,2XFN A,2XFR A,2XFV A,2XG5 A,2XGR A,2XGT A,2XGU A,2XGV A,2XHA  
A,2XHF A,2XHG A,2XHN A,2XI8 A,2XI9 A,2XIG A,2XIJ A,2XIO A,2XJ4 A,2XJH  
A,2XJI A,2XJP A,2XKI A,2XKR A,2XLG A,2XM5 A,2XME A,2XMI A,2XMJ  
A,2XMO A,2MX A,2XMZ A,2XN2 A,2XN6 A,2XNQ A,2XOC A,2XOD A,2XOL  
A,2XOM A,2XOT A,2XOV A,2XPP A,2XPW A,2XQ0 A,2XQH A,2XQO A,2XQQ  
A,2XQU A,2XR6 A,2XRH A,2XRW A,2XRY A,2XSA A,2XSE A,2XSF A,2XSG  
A,2XSK A,2XSQ A,2XST A,2XSU A,2XSW A,2XT2 A,2XTL A,2XTP A,2XTS  
A,2XTY A,2XU3 A,2XU8 A,2XU9 A,2XUA A,2XUS A,2XUV A,2XVE A,2XVM  
A,2XVS A,2XVY A,2XW6 A,2XW7 A,2XW9 A,2XWL A,2XWP A,2XWS A,2XWV  
A,2XWX A,2XXL A,2XXN A,2XXP A,2XXZ A,2XY1 A,2XY2 A,2XYI A,2XZ2  
A,2XZ4 A,2XZ8 A,2XZ9 A,2XZE A,2XZG A,2XZI A,2Y08 A,2Y0C A,2Y0O  
A,2Y0T A,2Y1B A,2Y1E A,2Y1N A,2Y24 A,2Y27 A,2Y28 A,2Y2A A,2Y2M  
A,2Y2Z A,2Y32 A,2Y3C A,2Y3J A,2Y3K A,2Y3V A,2Y3W A,2Y43 A,2Y44  
A,2Y4R A,2Y4Y A,2Y53 A,2Y5C A,2Y5M A,2Y5P A,2Y5S A,2Y6N A,2Y6U  
A,2Y6X A.

**Supplementary Table S12B. Transmembrane proteins used to compute maximal cliques, size-order and spherical coordinates.**



1A0S P,1A0S Q,1A0S R,1A0T P,1A0T Q,1A0T R,2A06 C,2A06 D,2A06 E,2A06 G,2A06 P,2A06 Q,2A06 R,2A06 T,2A06 W,2A0D A,3A0B A,3A0B B,3A0B C,3A0B D,3A0B E,3A0B F,3A0B H,3A0B I,3A0B J,3A0B K,3A0B L,3A0B M,3A0B T,3A0B X,3A0B Y,3A0B N,3A0B Z,3A0B A,3A0B B,3A0B C,3A0B D,3A0B E,3A0B F,3A0B H,3A0B I,3A0B J,3A0B K,3A0B L,3A0B M,3A0B T,3A0B X,3A0B Y,3A0B N,3A0B Z,3A0H A,3A0H B,3A0H C,3A0H D,3A0H E,3A0H F,3A0H H,3A0H I,3A0H J,3A0H K,3A0H L,3A0H M,3A0H T,3A0H X,3A0H Y,3A0H N,3A0H Z,3A0H A,3A0H B,3A0H C,3A0H D,3A0H E,3A0H F,3A0H H,3A0H I,3A0H J,3A0H K,3A0H L,3A0H M,3A0H T,3A0H X,3A0H Y,3A0H N,3A0H Z,4A01 A,4A01 B,1A11 A,3A2S X,3A2S A,3A2S B,4A2N B,5A2N A,5A2N B,5A2O A,5A2O B,3A3Y A,3A3Y B,3A3Y G,4A4M A,4A4M C,5A40 A,5A40 B,5A41 A,5A41 B,5A43 A,5A43 B,5A44 A,5A44 B,5A44 C,5A45 A,5A45 B,5A45 C,2A65 A,2A65 B,5A63 A,5A63 B,5A63 C,5A63 D,5A6E A,5A6E B,5A6G A,5A6G B,5A6U A,5A6U B,5A6U G,3A7K A,3A7K B,3A7K D,4A79 A,4A7A A,4A82 A,4A82 B,5A8E A,1A91 A,2A95 B,2A9H A,2A9H B,2A9H C,2A9H D,4A97 A,4A97 B,4A97 C,4A97 D,4A97 E,4A98 A,4A98 B,4A98 C,4A98 D,4A98 E,2ABM A,2ABM B,2ABM C,2ABM D,3ABK A,3ABK B,3ABK C,3ABK D,3ABK G,3ABK I,3ABK J,3ABK K,3ABK L,3ABK M,3ABK N,3ABK O,3ABK P,3ABK Q,3ABK T,3ABK V,3ABK W,3ABK X,3ABK Y,3ABK Z,3ABL A,3ABL B,3ABL C,3ABL D,3ABL G,3ABL I,3ABL J,3ABL K,3ABL L,3ABL M,3ABL N,3ABL O,3ABL P,3ABL Q,3ABL T,3ABL V,3ABL W,3ABL X,3ABL Y,3ABL Z,3ABM A,3ABM B,3ABM C,3ABM D,3ABM G,3ABM I,3ABM J,3ABM K,3ABM L,3ABM M,3ABM N,3ABM O,3ABM P,3ABM Q,3ABM T,3ABM V,3ABM W,3ABM X,3ABM Y,3ABM Z,3ABV C,3ABV D,3ABW A,3ABW B,3ABW D,5ABB A,5ABB B,5ABB Z,2AC6 A,2ACZ C,2ACZ D,2ACZ G,2ACZ H,2ACZ K,2ACZ L,4AC5 H,4AC5 L,4AC5 M,2AD0 C,2AD0 D,3AE1 C,3AE1 D,3AE2 C,3AE2 D,3AE3 C,3AE3 D,3AE4 C,3AE4 D,3AE5 C,3AE5 D,3AE6 C,3AE6 D,3AE7 C,3AE7 D,3AE8 C,3AE8 D,3AE9 C,3AE9 D,3AEA C,3AEA D,3AEB C,3AEB D,3AEC C,3AEC D,3AED C,3AED D,3AEE C,3AEE D,3AEF C,3AEF D,3AEG C,3AEG D,3AEH A,3AEH B,5AEX A,5AEX B,5AEX C,5AEZ A,5AEZ B,5AEZ C,1AF6 A,1AF6 B,1AF6 C,1AFO A,1AFO B,2AFL A,2AFL B,2AFL C,2AFL D,4AFK A,5AF1 A,5AF1 C,5AF1 D,2AGV A,3AG1 A,3AG1 B,3AG1 C,3AG1 D,3AG1 G,3AG1 I,3AG1 J,3AG1 K,3AG1 L,3AG1 M,3AG1 N,3AG1 O,3AG1 P,3AG1 Q,3AG1 T,3AG1 V,3AG1 W,3AG1 X,3AG1 Y,3AG1 Z,3AG2 A,3AG2 B,3AG2 C,3AG2 D,3AG2 G,3AG2 I,3AG2 J,3AG2 K,3AG2 L,3AG2 M,3AG2 N,3AG2 O,3AG2 P,3AG2 Q,3AG2 T,3AG2 V,3AG2 W,3AG2 X,3AG2 Y,3AG2 Z,3AG3 A,3AG3 B,3AG3 C,3AG3 D,3AG3 G,3AG3 I,3AG3 J,3AG3 K,3AG3 L,3AG3 M,3AG3 N,3AG3 O,3AG3 P,3AG3 Q,3AG3 T,3AG3 V,3AG3 W,3AG3 X,3AG3 Y,3AG3 Z,3AG4 A,3AG4 B,3AG4 C,3AG4 D,3AG4 G,3AG4 I,3AG4 J,3AG4 K,3AG4 L,3AG4 M,3AG4 N,3AG4 O,3AG4 P,3AG4 Q,3AG4 T,3AG4 V,3AG4 W,3AG4 X,3AG4 Y,3AG4 Z,4AGE A,4AGE B,4AGE C,4AGE D,4AGE E,4AGE F,4AGE G,4AGF A,4AGF B,4AGF C,4AGF D,4AGF E,4AGF F,4AGF G,2AH3 A,2AHY A,2AHY B,2AHY C,2AHY D,2AHZ A,2AHZ B,2AHZ C,2AHZ D,5AHY A,5AHY B,5AHY C,5AHZ A,5AHZ B,5AHZ C,7AHL A,7AHL B,7AHL C,7AHL D,7AHL E,7AHL F,7AHL G,1AIG L,1AIG M,1AIG H,1AIJ L,1AIJ M,1AIJ H,4AIN A,4AIN B,4AIN C,4AIP A,4AIP B,4AIP C,4AIQ A,5AJI A,5AJI B,5AJI C,5AJI D,5AJI E,5AJI F,5AJI G,2AKH X,2AKH Y,2AKH Z,2AKH A,2AKH B,2AKH C,2AKI X,2AKI Y,2AKI Z,2AKI A,2AKI B,2AKI C,4AL0 A,4AL0 B,4AL0 C,4AL1 A,4AL1 B,4AL1 C,2AMK A,3AM6 A,3AM6 B,3AM6 C,3AM6 D,4AMI A,4AMJ A,3ANZ A,3ANZ B,3ANZ C,3ANZ D,3ANZ E,3ANZ

F,3ANZ G,5AN8 A,5AN8 B,5AN8 C,5AN8 D,3AOA A,3AOA B,3AOA C,3AOB A,3AOB B,3AOB C,3AOC A,3AOC B,3AOC C,3AOD A,3AOD B,3AOD C,3AOU A,3AOU B,3AOU C,3AOU D,3AOU E,3AOU F,3AOU G,3AOU H,3AOU I,3AOU J,1AP9 A,1AP9 B,1AP9 C,4APS A,3AQP A,4AQ5 A,4AQ5 B,4AQ5 C,4AQ5 D,4AQ5 E,4AQ9 A,4AQ9 B,4AQ9 C,4AQ9 D,4AQ9 E,1AR1 A,1AR1 B,3AR2 A,3AR3 A,3AR4 A,3AR5 A,3AR6 A,3AR7 A,3AR8 A,3AR9 A,5ARA J,5ARA K,5ARA L,5ARA M,5ARA N,5ARA O,5ARA P,5ARA Q,5ARA T,5ARA W,5ARE J,5ARE K,5ARE L,5ARE M,5ARE N,5ARE O,5ARE P,5ARE Q,5ARE T,5ARE W,5ARH J,5ARH K,5ARH L,5ARH M,5ARH N,5ARH O,5ARH P,5ARH Q,5ARH T,5ARH W,5ARI J,5ARI K,5ARI L,5ARI M,5ARI N,5ARI O,5ARI P,5ARI Q,5ARI T,5ARI W,2ASG A,2ASG B,2ASG C,2ASG D,2ASG E,3ASN A,3ASN B,3ASN C,3ASN D,3ASN G,3ASN I,3ASN J,3ASN K,3ASN L,3ASN M,3ASN N,3ASN O,3ASN P,3ASN Q,3ASN T,3ASN V,3ASN W,3ASN X,3ASN Y,3ASN Z,3ASO A,3ASO B,3ASO C,3ASO D,3ASO G,3ASO I,3ASO J,3ASO K,3ASO L,3ASO M,3ASO N,3ASO O,3ASO P,3ASO Q,3ASO T,3ASO V,3ASO W,3ASO X,3ASO Y,3ASO Z,1AT9 A,1AT9 B,1AT9 C,1ATY A,2AT9 A,2AT9 B,2AT9 C,2ATK C,2ATK D,2ATK E,2ATK F,4ATV A,4ATV B,2AUI A,2AUL A,4AU5 A,4AU5 B,2AVL A,4AV3 A,4AV3 B,4AV6 A,4AV6 B,5AVQ A,5AVQ B,5AVQ G,5AVR A,5AVR B,5AVR G,5AVS A,5AVS B,5AVS G,5AVT A,5AVT B,5AVT G,5AVU A,5AVU B,5AVU G,5AVV A,5AVV B,5AVV G,5AVW A,5AVW B,5AVW G,5AVX A,5AVX B,5AVX G,5AVY A,5AVY B,5AVY G,5AVZ A,5AVZ B,5AVZ G,4AW6 B,5AW0 A,5AW0 B,5AW0 G,5AW1 A,5AW1 B,5AW1 G,5AW2 A,5AW2 B,5AW2 G,5AW3 A,5AW3 B,5AW3 G,5AW4 A,5AW4 B,5AW4 G,5AW5 A,5AW5 B,5AW5 G,5AW6 A,5AW6 B,5AW6 G,5AW7 A,5AW7 B,5AW7 G,5AW8 A,5AW8 B,5AW8 G,5AW9 A,5AW9 B,5AW9 G,5AWW Y,5AWW E,5AWW G,5AWZ A,2AXT A,2AXT B,2AXT C,2AXT D,2AXT E,2AXT F,2AXT H,2AXT I,2AXT J,2AXT K,2AXT L,2AXT M,2AXT T,2AXT X,2AXT Z,2AXT A,2AXT B,2AXT C,2AXT D,2AXT E,2AXT F,2AXT H,2AXT I,2AXT J,2AXT K,2AXT L,2AXT M,2AXT T,2AXT X,2AXT Z,5AX0 A,5AX1 A,3AYF A,3AYG A,3AYM A,3AYN A,4AYT A,4AYT B,4AYW A,4AYW B,4AYX A,4AYX B,5AYM A,5AYN A,5AYO A,4AZL A,5AZB A,5AZC A,2B0X A,2B2F A,2B2F B,2B2F C,2B2H A,2B2H B,2B2H C,2B2I A,2B2I B,2B2I C,2B2J A,2B2J B,2B2J C,3B29 A,3B29 B,3B29 C,4B2Q J,4B2Q K,4B2Q L,4B2Q M,4B2Q N,4B2Q O,4B2Q P,4B2Q Q,4B2Q R,4B2Q S,3B44 A,3B45 A,3B4R A,4B4A A,2B5F A,2B5F B,2B5F C,2B5F D,3B5D A,3B5D B,3B5W A,3B5W B,3B5X A,3B5X B,3B5Y A,3B5Y B,3B5Z A,3B5Z B,2B6O A,2B6O I,2B6O J,2B6O K,2B6P A,2B6P B,2B6P C,2B6P D,2B6Q A,2B6R A,2B6S A,2B6U A,2B6V A,3B60 A,3B60 B,3B61 A,4B61 A,2B76 C,2B76 D,2B76 O,2B76 P,4B7O A,3B8C A,3B8E C,3B8E D,3B8E H,1B9U A,3B9B A,3B9R A,3B9W A,3B9W B,3B9W C,3B9Y A,3B9Y B,3B9Y C,3B9Z A,3B9Z B,3B9Z C,1BA4 A,1BAC A,1BAD A,3BA6 A,2BBJ A,2BBJ B,2BBJ D,2BBJ E,2BBJ F,4BBJ A,1BCC C,1BCC D,1BCC E,1BCC G,1BCC J,1BCC M,1BCC N,1BCC P,1BCC R,1BCC U,1BCT A,2BCC C,2BCC D,2BCC E,2BCC G,2BCC J,3BCC C,3BCC D,3BCC E,3BCC G,3BCC J,3BCC M,3BCC N,3BCC P,3BCC R,3BCC U,1BE3 C,1BE3 D,1BE3 E,1BE3 G,1BE3 J,1BE3 K,3BEH A,3BEH B,3BEH C,3BEH D,4BEM A,4BEM B,4BEM C,4BEM D,4BEM E,4BEM F,4BEM G,4BEM H,4BEM I,4BEM J,4BEV A,4BEW A,4BEY A,4BEZ A,4BEZ B,1BGY C,1BGY D,1BGY E,1BGY G,1BGY J,1BGY K,1BGY O,1BGY P,1BGY Q,1BGY S,1BGY V,1BGY W,2BG9 A,2BG9 B,2BG9 C,2BG9 D,2BG9 E,4BGN A,4BGN C,4BGN D,4BGN E,1BH3 A,1BH3 B,1BH3 C,1BHA A,1BHB A,2BHW A,2BHW B,2BHW C,3BHS A,3BHS B,3BHS C,2BK3

A,1BL1 A,1BL8 A,1BL8 B,1BL8 C,1BL8 D,2BL2 A,2BL2 B,2BL2 C,2BL2 D,2BL2 E,2BL2 F,2BL2 G,2BL2 H,2BL2 I,2BL2 J,1BM1 A,1BM1 B,1BM1 C,2BMN A,1BNX A,2BNP A,2BNP B,2BNP C,2BNS A,2BNS B,2BNS C,1BOJ A,1BOK A,2BOB C,2BOB D,2BOB E,2BOB F,2BOC C,2BOC D,2BOC E,2BOC F,2BOZ H,2BOZ L,2BOZ M,4BOG A,4BOG B,4BOG C,4BOG D,4BOG E,4BOI A,4BOI B,4BOI C,4BOI D,4BOI E,4BON A,4BON B,4BON C,4BON D,4BON E,4BOO A,4BOO B,4BOO C,4BOO D,4BOO E,4BOR A,4BOR D,4BOR B,4BOR C,4BOR E,4BOT A,4BOT D,4BOT B,4BOT C,4BOT E,4BPD A,4BPD B,4BPD C,4BPM A,4BPM B,4BPM C,4BPQ A,4BPQ B,5BPS A,5BPS B,5BPS C,5BPS D,5BPS E,5BPS F,5BPS G,5BPS H,5BPS I,5BPS J,5BQ6 A,5BQ6 B,5BQ6 C,5BQ6 D,5BQ6 E,5BQ6 F,5BQ6 G,5BQ6 H,5BQ6 I,5BQ6 J,5BQA A,5BQA B,5BQA C,5BQA D,5BQA E,5BQA F,5BQA G,5BQA H,5BQA I,5BQA J,5BQJ A,5BQJ B,5BQJ C,5BQJ D,5BQJ E,5BQJ F,5BQJ G,5BQJ H,5BQJ I,5BQJ J,1BRD A,1BRD B,1BRD C,1BRR A,1BRR B,1BRR C,1BRX A,1BRX B,1BRX C,2BRD A,2BRD B,2BRD C,3BRY A,3BRZ A,4BRB A,4BRB B,4BRB C,4BRR A,4BRR B,4BRR C,2BS2 C,2BS2 F,2BS3 C,2BS3 F,2BS4 C,2BS4 F,3BS0 A,1BT9 A,1BT9 B,1BT9 C,1BTR A,1BTT A,4BUM X,4BUO A,5BUT I,5BUT J,3BVD A,3BVD B,3BVD C,4BV0 A,4BVN A,4BW5 A,4BW5 B,4BWB A,4BWZ A,5BW8 C,5BW8 D,1BXW A,1BY3 A,1BY5 A,2BY4 A,4BYG A,1BZK A,5BZ2 A,5BZ2 B,5BZ3 A,5BZ3 B,1C0V A,3C02 A,3C02 B,3C02 C,3C02 D,4C00 A,1C17 A,1C17 B,1C17 C,1C17 D,1C17 E,1C17 F,1C17 G,1C17 H,1C17 I,1C17 J,1C17 K,1C17 L,1C17 M,3C1G A,3C1G B,3C1G C,3C1H A,3C1H B,3C1H C,3C1I A,3C1I B,3C1I C,3C1J A,3C1J B,3C1J C,5C1M A,5C2T C,5C2T D,1C3W A,1C3W B,1C3W C,2C32 A,2C32 B,2C32 C,2C32 D,2C3E A,5C3L A,5C3L B,5C3L C,4C48 A,4C48 C,4C48 D,4C48 F,4C48 G,4C48 I,4C4V A,4C4V B,1C51 A,1C51 B,1C51 F,1C51 K,1C51 L,1C51 G,1C51 H,1C51 N,1C51 P,1C51 Q,1C51 R,1C51 S,1C51 W,1C51 Y,1C51 X,5C5X A,5C5X B,5C5X C,5C5X D,2C64 A,2C65 A,2C66 A,2C67 A,4C69 X,5C65 A,5C65 B,5C6N A,5C6O A,5C6P A,2C70 A,2C72 A,2C73 A,2C75 A,2C76 A,4C7R A,4C7R B,4C7R C,5C73 C,5C73 K,5C76 A,5C76 D,5C78 A,5C78 D,1C8R A,1C8R B,1C8R C,1C8S A,1C8S B,1C8S C,2C88 A,2C8K A,2C8L A,5C8J I,1C99 A,2C9M A,3C9L A,3C9M A,4C9G A,4C9H A,4C9J A,4C9Q A,4C9Q B,3CAP A,3CAP B,4CAD C,4CAS B,4CAS C,4CAS D,4CBC A,4CBC B,4CBC G,4CBC H,4CBJ A,4CBJ B,4CBJ C,4CBJ D,4CBJ E,4CBJ F,4CBJ G,4CBJ H,4CBJ I,4CBJ J,4CBJ K,4CBJ L,4CBJ M,4CBK A,4CBK B,4CBK C,4CBK D,4CBK E,4CBK F,4CBK G,4CBK H,4CBK I,4CBK J,4CBK K,4CBK L,4CBK M,4CDI A,4CDI C,4CDI B,4CDI D,4CDI E,4CDI F,2CFP A,2CFQ A,4CFG A,5CFB A,5CFB B,5CFB C,5CFB D,5CFB E,4CG5 A,4CG5 B,4CG5 C,4CG6 A,4CG6 B,4CG6 C,4CG6 D,4CG7 A,4CG7 B,4CG7 C,5CGC A,5CGD A,3CHX A,3CHX B,3CHX C,3CHX M,3CHX E,3CHX F,3CHX G,3CHX N,3CHX I,3CHX J,3CHX K,3CHX O,4CHV A,4CHV B,4CHV C,4CHV D,4CHW A,4CHW B,4CHW C,4CHW D,5CH4 Y,5CH4 E,5CH4 G,3CIR C,3CIR D,3CIR O,3CIR P,4CJZ A,4CJZ B,4CJZ C,4CK0 A,4CK0 B,4CK0 C,1CLT L,1CLT M,3CLL A,3CLL B,3CLL C,3CLL D,3CN5 A,3CN5 B,3CN5 C,3CN5 D,3CN6 A,3CN6 C,3CN6 D,3CN6 E,3COC A,3COC D,3COC C,3COD A,3COD D,3COD C,4COF A,4COF B,4COF C,4COF D,4COF E,2CPB A,2CPS A,4CRT A,3CSL A,3CSN A,4CSK A,4CSK B,4CSK C,4CSK D,4CTD A,5CTG A,5CTG B,5CTG C,5CTH A,5CTH B,5CTH C,4CU4 A,1CWQ A,1CWQ C,1CWQ E,3CWB C,3CWB D,3CWB E,3CWB G,3CWB J,3CWB P,3CWB Q,3CWB R,3CWB T,3CWB W,3CX5 C,3CX5 D,3CX5 E,3CX5 H,3CX5 I,3CX5 N,3CX5 O,3CX5

P,3CX5 S,3CX5 T,3CXH C,3CXH D,3CXH E,3CXH H,3CXH I,3CXH N,3CXH  
 O,3CXH P,3CXH S,3CXH T,2CYD A,2CYD B,2CYD C,2CYD D,2CYD E,2CYD  
 F,2CYD G,2CYD H,2CYD I,2CYD J,4CY4 A,4CY4 B,4CY4 C,4CY4 D,4CY4  
 E,4CZ8 A,4CZ8 B,4CZ9 A,4CZ9 B,4CZA A,4CZA B,4CZB A,4CZB B,4D0A  
 B,4D0A A,4D1A A,4D1B A,4D1C A,4D1D A,2D2C A,2D2C B,2D2C C,2D2C  
 D,2D2C E,2D2C F,2D2C G,2D2C H,2D2C N,2D2C O,2D2C P,2D2C Q,2D2C  
 R,2D2C S,2D2C T,2D2C U,4D2B A,4D2C A,4D2D A,4D2E A,4D2E B,4D2E  
 C,3D31 C,3D31 D,3D38 H,3D38 L,3D38 M,3D4S A,2D57 A,2D57 B,2D57  
 C,2D57 D,4D51 A,4D5B A,4D5D A,4D5U A,4D5U B,4D5U C,5D56 A,5D56  
 B,5D56 C,5D57 A,5D57 B,5D57 C,5D58 A,5D59 A,5D5A A,5D5B A,5D5D  
 A,4D6T C,4D6T D,4D6T E,4D6T G,4D6T J,4D6T P,4D6T Q,4D6T R,4D6T  
 T,4D6T W,4D6U C,4D6U D,4D6U E,4D6U G,4D6U J,4D6U P,4D6U Q,4D6U  
 R,4D6U T,4D6U W,3D9B A,3D9B B,3D9B C,3D9S A,3D9S B,3D9S C,3D9S  
 D,5D91 A,5D92 D,5D92 A,4DAJ A,5DA0 A,2DB4 A,2DB4 B,2DB4 C,2DB4  
 D,2DB4 E,2DB4 F,2DB4 G,2DB4 H,2DB4 I,2DB4 J,4DBL A,4DBL B,4DCB  
 A,1DDD 1,1DDD 2,1DDD 3,1DDD 4,1DDD 5,1DDD 6,1DDD 7,3DDL A,3DDR  
 B,3DET A,3DET B,2DF9 A,1DHL A,2DHH A,2DHH B,2DHH C,2DHL A,3DH4  
 A,3DH4 B,3DHL A,3DHW A,3DHW B,5DHG A,5DHH A,3DIN C,3DIN D,3DIN  
 E,4DJH A,4DJH B,4DJI A,4DJK A,5DJQ A,5DJQ B,5DJQ C,5DJQ N,4DKL  
 A,4DKL B,3DL8 G,3DL8 C,3DL8 E,5DL5 A,5DL6 A,5DL7 A,5DL8 B,4DNR  
 A,4DNR F,4DNR I,4DNT A,4DNT F,4DNT I,5DN6 J,5DN6 K,5DN6 L,5DN6  
 M,5DN6 N,5DN6 O,5DN6 P,5DN6 Q,5DN6 R,5DN6 S,5DN6 T,5DN6 U,5DN6  
 X,5DN6 Y,1DOP A,1DOP D,4DOJ A,4DOJ B,4DOJ C,4DOP A,4DOP F,4DOP  
 I,2DQS A,3DQB A,3DQB C,2DR6 A,2DR6 B,2DR6 C,2DRD A,2DRD B,2DRD  
 C,1DS8 L,1DS8 M,1DS8 H,3DSY L,3DSY M,3DSY H,3DTA L,3DTA M,3DTA  
 H,3DTR L,3DTR M,3DTR H,3DTS L,3DTS M,3DTS H,3DTU A,3DTU B,3DU2  
 L,3DU2 M,3DU2 H,3DU3 L,3DU3 M,3DU3 H,3DUQ L,3DUQ M,3DUQ H,5DUO  
 A,5DUO B,1DV3 L,1DV3 M,1DV3 H,1DV6 L,1DV6 M,1DV6 H,4DVE A,2DW3  
 A,2DWD C,2DWD D,2DWD E,2DWD F,2DWE C,2DWE D,2DWE E,2DWE  
 F,3DWN A,3DWO X,3DWW A,3DWW B,3DWW C,4DW0 A,4DW0 B,4DW0  
 C,4DW1 A,4DW1 B,4DW1 C,1DX7 A,1DXR H,1DXR L,1DXR M,1DXZ A,4DX5  
 A,4DX5 B,4DX5 C,4DX6 A,4DX6 B,4DX6 C,4DX7 A,4DX7 B,4DX7 C,4DXW  
 A,4DXW B,4DXW C,4DXW D,2DYR A,2DYR B,2DYR C,2DYR D,2DYR  
 G,2DYR I,2DYR J,2DYR K,2DYR L,2DYR M,2DYR N,2DYR O,2DYR P,2DYR  
 Q,2DYR T,2DYR V,2DYR W,2DYR X,2DYR Y,2DYR Z,2DYS A,2DYS B,2DYS  
 C,2DYS D,2DYS G,2DYS I,2DYS J,2DYS K,2DYS L,2DYS M,2DYS N,2DYS  
 O,2DYS P,2DYS Q,2DYS T,2DYS V,2DYS W,2DYS X,2DYS Y,2DYS Z,5DYE  
 A,5DYE B,5DYE C,5DYE D,1DZE A,1DZE B,1DZE C,3DZM A,1E0P A,1E0P  
 B,1E0P C,1E12 A,1E12 C,1E12 D,1E14 L,1E14 M,1E14 H,4E1S A,4E1T  
 A,5E1J A,5E1J B,1E54 A,1E6D L,1E6D M,1E6D H,1E7P C,1E7P F,2E74  
 A,2E74 B,2E74 C,2E74 D,2E74 E,2E74 F,2E74 G,2E74 H,2E74 I,2E74 J,2E74  
 K,2E74 L,2E74 M,2E74 N,2E74 P,2E74 Q,2E75 A,2E75 B,2E75 C,2E75  
 D,2E75 E,2E75 F,2E75 G,2E75 H,2E75 I,2E75 J,2E75 K,2E75 L,2E75 M,2E75  
 N,2E75 P,2E75 Q,2E76 A,2E76 B,2E76 C,2E76 D,2E76 E,2E76 F,2E76  
 G,2E76 H,2E76 I,2E76 J,2E76 K,2E76 L,2E76 M,2E76 N,2E76 P,2E76 Q,3E83  
 A,3E83 C,3E83 D,3E83 E,3E86 A,3E86 C,3E86 D,3E86 E,3E89 A,3E89  
 C,3E89 D,3E89 E,3E8B A,3E8B C,3E8B D,3E8B E,3E8F A,3E8F C,3E8F  
 D,3E8F E,3E8G A,3E8G C,3E8G D,3E8G E,3E8H A,3E8H C,3E8H D,3E8H  
 E,3E9J C,2EAR A,2EAT A,2EAU A,3EAM A,3EAM B,3EAM C,3EAM D,3EAM  
 E,4EA3 A,4EEB A,4EEB B,4EEB C,4EEB D,4EEB E,4EED A,4EED B,4EED

C,4EED D,4EED E,3EFF K,3EFF L,3EFF M,3EFF N,3EFM A,3EGW C,3EGW F,1EHK A,1EHK B,1EHK C,3EH3 A,3EH3 B,3EH3 C,3EH4 A,3EH4 B,3EH4 C,3EH5 A,3EH5 B,3EH5 C,3EHB A,3EHB B,3EHZ A,3EHZ B,3EHZ C,3EHZ D,3EHZ E,5EH4 A,5EH4 B,5EH6 A,2EI4 A,2EI4 B,2EI4 C,2EIJ A,2EIJ B,2EIJ C,2EIJ D,2EIJ G,2EIJ I,2EIJ J,2EIJ K,2EIJ L,2EIJ M,2EIJ N,2EIJ O,2EIJ P,2EIJ Q,2EIJ T,2EIJ V,2EIJ W,2EIJ X,2EIJ Y,2EIJ Z,2EIK A,2EIK B,2EIK C,2EIK D,2EIK G,2EIK I,2EIK J,2EIK K,2EIK L,2EIK M,2EIK N,2EIK O,2EIK P,2EIK Q,2EIK T,2EIK V,2EIK W,2EIK X,2EIK Y,2EIK Z,2EIL A,2EIL B,2EIL C,2EIL D,2EIL G,2EIL I,2EIL J,2EIL K,2EIL L,2EIL M,2EIL N,2EIL O,2EIL P,2EIL Q,2EIL T,2EIL V,2EIL W,2EIL X,2EIL Y,2EIL Z,2EIM A,2EIM B,2EIM C,2EIM D,2EIM G,2EIM I,2EIM J,2EIM K,2EIM L,2EIM M,2EIM N,2EIM O,2EIM P,2EIM Q,2EIM T,2EIM V,2EIM W,2EIM X,2EIM Y,2EIM Z,2EIN A,2EIN B,2EIN C,2EIN D,2EIN G,2EIN I,2EIN J,2EIN K,2EIN L,2EIN M,2EIN N,2EIN O,2EIN P,2EIN Q,2EIN T,2EIN V,2EIN W,2EIN X,2EIN Y,2EIN Z,3EI0 A,3EI0 B,3EI0 C,3EI0 D,3EI0 E,4EIJ A,3EJY A,3EJY B,3EJZ A,3EJZ B,4EJ4 A,1EK9 A,1EK9 B,1EK9 C,4EKW A,4EKW B,4EKW E,4EKW F,5EK0 A,5EK0 B,5EK0 C,5EK0 D,5EKE A,5EKE B,5EKE C,5EKE D,5EKP C,5EKP A,5EKP B,5EKP D,5EKQ A,3EML A,3EMN X,3EMO C,3EMO A,3EMO B,4ENE A,4ENE B,4EPA A,1EQ8 A,2ERV A,2ERV B,5ER7 B,5ER7 A,5ER7 C,5ER7 D,5ER7 E,5ER7 F,5ERA B,5ERA A,5ERA C,5ERA D,5ERA E,5ERA F,1ET2 S,1ET3 S,2EVU A,2EVU B,2EVU C,2EVU D,4EV6 A,4EV6 B,4EV6 C,4EV6 D,4EV6 E,2EXW A,2EXW B,2EXY A,2EXY B,1EYS L,1EYS M,1EYS H,1EZV C,1EZV D,1EZV E,1EZV G,1EZV I,1EZV L,1EZV M,1EZV N,1EZV R,1EZV S,2EZ0 A,2EZ0 B,4EYC A,4EYC B,4EYC C,4EYC D,4EYC E,2F1C X,2F1T A,2F1U A,2F1U B,2F1U C,2F1U D,2F1U E,2F1U F,2F1U G,2F1V A,2F1V B,2F2B A,2F2B B,2F2B C,2F2B D,3F3A A,3F3A B,3F3C A,3F3C B,3F3D A,3F3D B,3F3E A,3F3E B,4F35 B,4F35 A,1F4Z A,1F4Z B,1F4Z C,3F48 A,3F48 B,3F4I A,3F4I B,3F4J A,3F4J B,4F4C A,4F4L A,4F4L B,4F4L C,4F4L D,4F4S K,4F4S L,4F4S M,4F4S N,4F4S O,4F4S P,4F4S Q,4F4S R,4F4S S,4F4S T,1F50 A,1F50 B,1F50 C,3F5W C,3F5W D,3F5W E,3F5W F,1F6G A,1F6G B,1F6G C,1F6G D,1F6N L,1F6N M,1F6N H,2F75 A,3F7V C,3F7V D,3F7V E,3F7V F,3F7Y C,3F7Y D,3F7Y E,3F7Y F,1F88 A,1F88 C,4F8H A,4F8H B,4F8H C,4F8H D,4F8H E,5F8U B,5F8U A,2F93 A,2F93 B,2F93 C,2F93 D,2F95 A,2F95 B,2F95 C,2F95 D,4FA7 A,4FA7 B,4FA7 C,4FAA A,4FAA B,4FAA C,1FBB A,1FBB B,1FBB C,1FBK A,1FBK B,1FBK C,2FBW C,2FBW D,3FB5 C,3FB5 D,3FB5 E,3FB5 F,3FB6 C,3FB6 D,3FB6 E,3FB6 F,3FB7 C,3FB7 D,3FB7 E,3FB7 F,3FB8 C,3FB8 E,3FB8 F,3FB8 G,4FBY A,4FBY B,4FBY C,4FBY D,4FBY E,4FBY F,4FBY H,4FBY I,4FBY J,4FBY K,4FBY L,4FBY M,4FBY T,4FBY Y,4FBY X,4FBY Y,4FBY Z,4FBY G,4FBY N,4FBY P,4FBY Q,4FBY R,4FBY S,4FBY W,4FBY A,4FBY B,4FBY C,4FBY D,4FBY E,4FBY G,4FBY M,4FBY J,4FBY K,4FBY L,4FBZ A,4FBZ B,4FBZ C,1FCP A,2FCP A,4FC4 A,4FC4 B,4FC4 C,4FC4 D,4FC4 E,1FDF A,1FDM A,1FE1 A,1FE1 B,1FE1 C,1FE1 D,1FE1 E,1FE1 F,1FE1 G,1FE1 J,1FE1 K,1FE1 L,1FE1 M,1FE1 N,1FE1 O,1FE1 P,1FEP A,2FEC A,2FEC B,2FED A,2FED B,2FEE A,2FEE B,4FE1 A,4FE1 B,4FE1 F,4FE1 I,4FE1 J,4FE1 K,4FE1 L,4FE1 M,4FE1 X,1FFT A,1FFT B,1FFT C,1FFT D,2FF9 A,2FGQ X,2FGQ A,2FGQ B,2FGR A,2FGR C,2FGR E,3FGO A,4FG6 A,4FG6 B,5FGZ A,3FH6 F,3FH6 G,3FHH A,1FI1 A,3FI1 A,3FI1 B,3FID A,3FIP A,4FI3 A,4FI3 B,5FIJ J,5FIJ K,5FIJ L,5FIJ M,5FIJ N,5FIJ O,5FIJ P,5FIJ Q,5FIJ T,5FIJ W,5FIK J,5FIK K,5FIK L,5FIK M,5FIK N,5FIK O,5FIK P,5FIK Q,5FIK T,5FIK W,5FIL J,5FIL K,5FIL L,5FIL M,5FIL N,5FIL

O,5FIL P,5FIL Q,5FIL T,5FIL W,1FJK A,1FJP A,2FKW A,2FKW B,2FKW  
 C,2FKW D,2FKW E,2FKW F,2FKW G,2FKW H,2FKW I,2FKW J,2FKW K,2FKW  
 L,2FKW M,2FKW N,2FKW O,2FKW P,2FKW R,2FKW S,4FMS B,1FNP L,1FNP  
 M,1FNP H,1FNQ L,1FNQ M,1FNQ H,5FN2 B,5FN2 D,5FN2 A,5FN2 C,5FN5  
 B,5FN5 D,5FN5 A,5FN5 C,4FOZ A,3FPB A,3FPS A,4FPD A,4FPD B,4FPD  
 C,1FQU A,1FQY A,1FQY B,1FQY C,1FQY D,4FQE A,4FRT A,4FRX A,4FSO  
 A,4FSP A,4FT6 A,4FTP A,4FTP B,4FUV A,4FUV B,1FW2 A,1FW3 A,1FW3  
 B,3FWL A,1FX8 A,1FX8 B,1FX8 C,1FX8 D,4FXZ A,4FXZ B,2FYN A,2FYN  
 B,2FYN C,2FYN D,2FYN E,2FYN F,2FYU C,2FYU D,2FYU E,2FYU G,2FYU  
 J,2FYU K,3FYE A,3FYE B,3FYI A,3FYI B,3FYX A,3FYX B,3FYX C,4FY0  
 A,4FY0 B,4FZ0 A,4FZ0 B,4FZ0 C,4FZ1 A,4FZ1 B,4FZ1 E,2G1X A,4G1U  
 A,4G1U B,2G2A A,3G5U A,3G60 A,3G61 A,3G6B A,3G6B B,3G7F H,3G7F  
 L,3G7F M,4G70 A,4G70 B,4G70 C,4G71 A,4G71 B,4G71 C,4G72 A,4G72  
 B,4G72 C,4G7Q A,4G7Q B,4G7Q C,4G7R A,4G7R B,4G7R C,4G7S A,4G7S  
 B,4G7S C,4G7V S,4G7Y S,2G87 A,4G80 S,4G80 T,1G90 A,3GB7 C,3GB7  
 D,3GB7 E,3GB7 F,4GBR A,4GBY A,4GBZ A,4GC0 A,4GCP A,4GCQ A,4GCS  
 A,3GD8 A,3GD8 B,3GD8 C,3GD8 D,4GD3 S,4GD3 T,4GD3 Q,4GD3 R,4GD3  
 A,4GD3 B,2GE4 A,4GEY A,1GFM A,1GFM B,1GFM C,1GFN A,1GFN B,1GFN  
 C,1GFO A,1GFO B,1GFO C,1GFP A,1GFP B,1GFP C,1GFQ A,1GFQ B,1GFQ  
 C,2GFP A,2GFZ A,4GF4 A,2GIF A,2GIF B,2GIF C,3GI8 C,3GI9 C,3GIA  
 A,3GJC A,3GJC B,3GJD A,3GJD B,2GMR L,2GMR M,2GMR H,2GNU H,2GNU  
 L,2GNU M,3GP6 A,4GP4 A,4GP4 B,4GP4 C,4GP5 A,4GP5 B,4GP5 C,4GP8  
 A,4GP8 B,4GP8 C,4GPO A,4GPO B,2GR7 A,2GR7 B,2GR7 C,2GR7 D,2GR7  
 E,2GR7 F,2GR8 A,2GR8 C,2GR8 D,2GRX A,4GRV A,2GSK A,2GSM A,2GSM  
 B,1GU8 A,1GUE A,2GUF A,3GWU A,3GWU B,3GWV A,3GWV B,3GWW  
 A,3GWW B,4GX0 A,4GX0 B,4GX0 E,4GX0 F,4GX1 A,4GX1 B,4GX1 E,4GX1  
 F,4GX2 A,4GX2 B,4GX2 E,4GX2 F,4GX5 A,4GX5 B,4GX5 E,4GX5 F,4GYC  
 A,4GYC B,4GYC C,4GYC D,1GZM A,1GZM C,4H0L A,4H0L B,4H0L C,4H0L  
 D,4H0L E,4H0L F,4H0L G,4H0L H,4H0L I,4H0L J,4H0L K,4H0L L,4H0L  
 M,4H0L N,4H0L O,4H0L P,3H1H C,3H1H D,3H1H E,3H1H G,3H1H J,3H1H  
 P,3H1H Q,3H1H R,3H1H T,3H1H W,3H1I C,3H1I D,3H1I E,3H1I G,3H1I J,3H1I  
 P,3H1I Q,3H1I R,3H1I T,3H1I W,3H1J C,3H1J D,3H1J E,3H1J G,3H1J J,3H1J  
 P,3H1J Q,3H1J R,3H1J T,3H1J W,3H1K C,3H1K D,3H1K E,3H1K G,3H1K  
 J,3H1K P,3H1K Q,3H1K R,3H1K T,3H1K W,3H1L C,3H1L D,3H1L E,3H1L  
 G,3H1L J,3H1L P,3H1L Q,3H1L R,3H1L T,3H1L W,4H13 A,4H13 B,4H13  
 C,4H13 D,4H13 E,4H13 F,4H13 G,4H13 H,4H13 I,4H13 J,4H13 K,4H13 L,4H13  
 M,4H13 N,4H13 O,4H13 P,4H1D A,4H1D B,4H1D C,4H1W A,4H1W B,1H2S  
 A,1H2S B,1H2S C,1H2S D,2H2P A,2H2P B,2H2S A,2H2S B,2H3O A,4H33  
 A,4H33 B,4H33 C,4H33 D,4H37 A,4H37 B,4H37 C,4H37 D,4H44 A,4H44  
 B,4H44 C,4H44 D,4H44 E,4H44 F,4H44 G,4H44 H,4H44 I,4H44 J,4H44  
 K,4H44 L,4H44 M,4H44 N,4H44 O,4H44 P,1H68 A,1H6I A,1H6S 1,2H88  
 C,2H88 D,2H89 C,2H89 D,2H8A A,2H8A B,2H8A C,2H8P C,2H8P D,2H8P  
 E,2H8P F,2H8P G,2H8P H,2H8P I,2H8P J,3H90 A,3H9V A,3H9V B,3H9V  
 C,4H99 L,4H99 M,4H99 H,4H9L L,4H9L M,4H9L H,2HAC A,2HAC B,3HAN  
 A,3HAO A,3HAO D,3HAO C,3HAP A,3HAQ A,3HAR A,3HAS A,3HB3 A,3HB3  
 B,4HBH L,4HBH M,4HBH H,4HBJ L,4HBJ M,4HBJ H,2HDF A,2HDI A,3HD6  
 A,3HD6 B,3HD6 C,3HD7 A,3HD7 B,2HE6 ,4HE8 B,4HE8 D,4HE8 E,4HE8  
 F,4HE8 G,4HE8 I,4HE8 C,4HEA A,4HEA J,4HEA K,4HEA L,4HEA M,4HEA  
 N,4HEA H,2HFE C,2HFE D,2HFE E,2HFE F,2HFE G,2HFE H,2HFE I,2HFE  
 J,3HFX A,3HFX B,3HFX C,4HFB A,4HFB B,4HFB C,4HFB D,4HFB E,4HFC

A,4HFC B,4HFC C,4HFC D,4HFC E,4HFD A,4HFD B,4HFD C,4HFD D,4HFD E,4HFE A,4HFE B,4HFE C,4HFE D,4HFE E,4HFI A,4HFI B,4HFI C,4HFI D,4HFI E,2HG3 L,2HG3 M,2HG3 H,2HG5 C,2HG5 D,2HG5 E,2HG5 F,2HG5 G,2HG5 H,2HG5 I,2HG5 J,2HG9 L,2HG9 M,2HG9 H,4HG6 A,4HG6 B,2HH1 L,2HH1 M,2HH1 H,2HHK L,2HHK M,2HHK H,2HI7 B,2HIT L,2HIT M,2HIT H,2HJ6 L,2HJ6 M,2HJ6 H,2HJF C,2HJF D,2HJF E,2HJF F,3HKK A,3HKK B,3HKK C,4HKK A,4HKK B,4HKK C,4HKK D,4HKK E,4HKK F,4HKS A,4HKS B,4HKS C,4HKS D,4HKS E,4HKS F,2HLF A,2HLF B,4HMK A,4HMK B,2HN2 A,2HN2 B,2HN2 C,2HN2 D,2HN2 E,4HOD A,4HOD B,2HPY A,3HPL C,3HPL D,3HPL E,3HPL F,2HQC A,2HQC B,2HQC C,2HQD A,2HQD B,2HQD C,2HQF A,2HQF B,2HQF C,2HQG A,2HQG B,2HQG C,4HQJ C,4HQJ D,4HQJ E,2HRT A,2HRT B,2HRT C,2HT2 A,2HT2 B,2HT3 A,2HT3 B,2HT4 A,2HT4 B,2HTG A,2HTK A,2HTK B,2HTL A,2HTL B,4HTS A,4HTT A,4HUK A,4HUL A,4HUM A,4HUN A,4HUQ S,4HUQ T,2HVJ C,2HVJ D,2HVJ E,2HVJ F,2HVK C,2HVK D,2HVK E,2HVK F,3HW9 A,3HWB A,3HWB C,3HWB D,4HW9 A,4HW9 B,4HW9 C,4HW9 D,4HW9 E,4HW9 F,4HW9 G,4HWA A,4HWA B,4HWA C,4HWA D,4HWA E,4HWA F,4HWA G,4HWL A,1HXT A,1HXT B,1HXT C,1HXU A,1HXU B,1HXU C,1HXX A,1HXX B,1HXX C,2HYD A,2HYD B,2HYN A,2HYN B,2HYN C,2HYN D,2HYN E,4HYC A,4HYC B,4HYC C,4HYC D,4HYD A,4HYD B,4HYD C,4HYD D,4HYG A,4HYJ A,4HYO A,4HYO B,4HYO C,4HYO D,4HYT A,4HYT B,4HYT G,4HYX A,1HZX A,1HZX C,4HZ3 D,4HZ3 C,4HZ3 A,4HZ3 B,4HZU T,4HZU S,4I0U A,4I0U B,4I0U C,4I0U D,4I0U E,1I15 A,1I15 B,1I15 C,1I15 D,1I15 E,1I15 F,1I15 G,2I1X A,2I1X B,2I1X C,2I20 A,2I20 B,2I20 C,2I21 A,2I21 B,2I21 C,2I35 A,2I36 A,2I36 B,2I37 A,2I37 B,3I4D L,3I4D M,3I4D H,2I5N H,2I5N L,2I5N M,3I5D A,3I5D B,3I5D C,2I6W A,2I6W B,2I6W C,1I78 A,4I7Z A,4I7Z B,4I7Z C,4I7Z D,4I7Z E,4I7Z F,4I7Z G,4I7Z H,4I7Z I,4I7Z J,4I7Z K,4I7Z L,4I7Z M,4I7Z N,4I7Z O,4I7Z P,4I9W A,4I9W B,2IAH A,4IA4 A,4IA4 B,4IA4 C,4IA4 D,4IAQ A,4IAR A,2IBZ C,2IBZ D,2IBZ E,2IBZ G,2IBZ I,4IB4 A,2IC8 A,3IFX A,3IFX B,3IFX C,3IFX D,4IFF A,4IFF B,1IGK A,1IGK B,1IGK C,1IGK D,1IGK E,1IGK F,1IGK G,3IGA C,3IGA D,3IGA E,3IGA F,1IH5 A,1IH5 B,1IH5 C,1IH5 D,2IH1 C,2IH1 D,2IH1 E,2IH1 F,2IH3 C,2IH3 D,2IH3 E,2IH3 F,1IIJ A,1IIV A,1IIV B,1IIV C,2IIL ,1IJD A,1IJD B,1IJD C,1IJD D,1IJD E,1IJD F,1IJD G,1IJD H,1IJD I,1IJD J,1IJD K,1IJD L,1IJD M,1IJD N,1IJD P,1IJD Q,1IJD R,1IJD S,1IJP A,3IJ4 A,3IJ4 B,3IJ4 C,2IK3 ,2IK5 ,4IKV A,4IKW A,4IKX A,4IKY A,4IKZ A,1ILD A,1ILX A,1ILX B,1ILX C,1ILX D,1ILX E,1ILX F,1ILX G,1ILX J,1ILX K,1ILX L,1ILX M,1ILX N,1ILX O,1ILX P,1ILZ A,4IL3 A,4IL4 A,4IL4 B,4IL4 C,4IL4 D,4IL4 E,4IL6 A,4IL6 B,4IL6 C,4IL6 D,4IL6 E,4IL6 F,4IL6 H,4IL6 I,4IL6 J,4IL6 K,4IL6 L,4IL6 M,4IL6 T,4IL6 Y,4IL6 X,4IL6 Z,4IL6 R,4IL6 A,4IL6 B,4IL6 C,4IL6 D,4IL6 E,4IL6 F,4IL6 H,4IL6 I,4IL6 J,4IL6 K,4IL6 L,4IL6 M,4IL6 T,4IL6 Y,4IL6 X,4IL6 Z,4IL9 A,4IL9 B,4IL9 C,4IL9 D,4IL9 E,4ILA A,4ILA B,4ILA C,4ILA D,4ILA E,4ILB A,4ILB B,4ILB C,4ILB D,4ILB E,4ILC A,4ILC B,4ILC C,4ILC D,4ILC E,1IM0 A,4IN5 L,4IN5 M,4IN5 H,4IN6 L,4IN6 M,4IN6 H,4IN7 H,4IN7 L,4IN7 M,3IPD A,3IPD B,2IQ4 ,2IQK A,2IQK C,2IQL A,2IQM A,2IQN A,2IQO A,2IQP A,2IQR A,2IQS A,2IQU A,2IQV A,2IQW A,2IRV A,2IRV D,2IRV C,3IR5 C,3IR5 F,3IR6 C,3IR6 F,3IR7 C,3IR7 H,4IRE A,4IRE B,4IRE C,4IRE D,4IRE E,2ITA A,2ITC C,2ITC D,2ITC E,2ITC F,2ITD C,2ITD D,2ITD E,2ITD F,2IUB A,2IUB B,2IUB C,2IUB D,2IUB E,4IU8 A,4IU9 B,1IW6 A,1IW6 B,1IW6 C,1IW9 A,1IW9 B,1IW9 C,1IWG A,1IWG B,1IWG C,1IWO A,2IWW A,2IWW A,1IXF A,1IXF B,1IXF C,3IXZ A,3IXZ B,4IXQ A,4IXQ B,4IXQ C,4IXQ D,4IXQ E,4IXQ F,4IXQ

H,4IXQ I,4IXQ J,4IXQ K,4IXQ L,4IXQ M,4IXQ T,4IXQ Y,4IXQ X,4IXQ Z,4IXQ  
Y,4IXQ A,4IXQ B,4IXQ C,4IXQ D,4IXQ E,4IXQ F,4IXQ H,4IXQ I,4IXQ J,4IXQ  
K,4IXQ L,4IXQ M,4IXQ T,4IXQ G,4IXQ X,4IXQ Z,4IXQ G,4IXR A,4IXR B,4IXR  
C,4IXR D,4IXR E,4IXR F,4IXR H,4IXR I,4IXR J,4IXR K,4IXR L,4IXR M,4IXR  
T,4IXR Y,4IXR X,4IXR Z,4IXR G,4IXR A,4IXR B,4IXR C,4IXR D,4IXR E,4IXR  
F,4IXR H,4IXR I,4IXR J,4IXR K,4IXR L,4IXR M,4IXR T,4IXR G,4IXR X,4IXR  
Z,4IXR Y,3IYZ A,3IYZ B,3IYZ C,3IYZ D,3IZ1 A,3IZ1 B,3IZ1 C,3IZ1 D,3IZ1  
E,3IZ1 F,3IZ2 A,3IZ2 B,3IZ2 C,3IZ2 D,3IZ2 E,3IZ2 F,4IZM A,4IZM B,4IZM  
C,3J08 A,3J08 B,3J09 A,3J09 B,4J05 A,2J1H A,2J1N A,2J1N B,2J1N C,3J1Z  
P,3J1Z Q,4J2T A,1J4N A,1J4N B,1J4N C,1J4N D,2J4U P,2J4U Q,2J4U R,2J4Y  
A,3J41 A,3J41 B,3J41 C,3J41 D,4J4Q A,2J58 A,2J58 B,2J58 C,2J58 D,2J58  
E,2J58 F,2J58 G,2J58 H,3J5P B,3J5P A,3J5P C,3J5P D,3J5Q D,3J5Q B,3J5Q  
E,3J5Q G,3J5R B,3J5R A,3J5R C,3J5R D,1J7F A,1J7F B,1J7F C,1J7F D,1J7F  
E,1J7F F,1J7F G,1J7F H,1J7F J,1J7F I,1J7F K,1J7F L,2J7A C,2J7A F,3J7T  
A,4J72 A,4J72 B,4J7C K,4J7C L,4J7T A,4J7T B,4J7T C,4J7Y A,4J7Y B,4J7Y  
C,2J8C H,2J8C L,2J8C M,2J8D H,2J8D L,2J8D M,2J8S A,2J8S B,2J8S C,3J8A  
F,3J8A G,1J95 A,1J95 B,1J95 C,1J95 D,3J9J A,3J9J B,3J9J C,3J9J D,3J9P  
D,3J9P A,3J9P B,3J9P C,3J9T Y,3J9T R,3J9T U,3J9T V,3J9T T,3J9T W,3J9T  
S,3J9T X,3J9T Z,3J9T A,3J9U U,3J9U X,3J9U A,3J9U R,3J9U Z,3J9U S,3J9U  
Y,3J9U T,3J9U V,3J9U W,3J9V R,3J9V U,3J9V X,3J9V Y,3J9V W,3J9V  
Z,3J9V V,3J9V A,3J9V S,3J9V T,4J9U A,4J9U B,2JAF A,2JAF B,2JAF C,2JAG  
A,2JAG B,2JAG C,3JAC A,3JAC B,3JAC C,3JAD A,3JAD B,3JAD C,3JAD  
D,3JAD E,3JAE A,3JAE B,3JAE C,3JAE D,3JAE E,3JAF A,3JAF B,3JAF  
C,3JAF D,3JAF E,3JAV A,3JAV B,3JAV C,3JAV D,4JA3 A,4JA4 A,1JB0  
A,1JB0 B,1JB0 F,1JB0 I,1JB0 J,1JB0 K,1JB0 L,1JB0 M,1JB0 X,2JBL H,2JBL  
L,2JBL M,3JBR A,3JBR E,4JBW F,4JBW G,3JC2 1,3JC2 2,3JC2 3,4JC6  
A,4JC6 B,4JC6 C,4JC6 D,4JC7 A,4JC7 B,4JC7 C,4JCZ A,4JCZ B,4JCZ  
C,1JDM A,1JFP A,4JFB A,4JFB B,4JFB C,1JGJ A,1JGW L,1JGW M,1JGW  
H,1JGX L,1JGX M,1JGX H,1JGY L,1JGY M,1JGY H,1JGZ L,1JGZ M,1JGZ  
H,1JH0 L,1JH0 M,1JH0 H,2JIY H,2JIY L,2JIY M,2JJ0 H,2JJ0 L,2JJ0 M,2JK4  
A,2JK5 C,2JK5 D,2JK5 E,2JK5 F,4JKV A,4JKV B,2JLN A,2JMM A,1JO5  
A,2JO1 A,2JP3 A,1JQ1 A,1JQ1 B,1JQ1 C,1JQ1 D,1JQ2 A,1JQ2 B,1JQ2  
C,1JQ2 D,2JQY A,4JQ6 A,4JQ6 B,4JQ6 C,4JQ6 D,4JQ6 E,4JQ6 F,4JR8  
A,4JR8 B,4JR8 C,4JR9 A,4JRE A,4JRZ A,4JRZ B,4JRZ C,2JTW A,3JTY  
A,4JTA B,4JTA D,4JTA F,4JTA H,4JTC B,4JTD B,1JV6 A,1JV7 A,1JVM  
A,1JVM B,1JVM C,1JVM D,2JWA A,2JWA B,3JYC A,3JYC B,3JYC C,3JYC  
D,2K0L A,3K03 A,3K03 C,3K03 D,3K03 E,3K04 A,3K04 C,3K04 D,3K04  
E,3K06 A,3K06 C,3K06 D,3K06 E,3K07 A,3K07 B,3K07 C,3K08 A,3K08  
C,3K08 D,3K08 E,3K0D A,3K0D C,3K0D D,3K0D E,3K0G A,3K0G C,3K0G  
D,3K0G E,3K0I A,3K0I B,3K0I C,4K0E A,4K0E B,4K0E C,4K0J A,4K0J B,4K0J  
C,2K1A A,2K1K A,2K1K B,2K1L A,2K1L B,3K19 A,3K19 B,3K19 C,3K1B  
A,3K1B B,3K1B C,4K1C A,1K24 A,2K21 A,2K3C A,3K3F A,3K3F B,3K3F  
C,3K3G A,3K3G B,3K3G C,4K3B A,4K3C A,1K4C C,1K4C F,1K4C I,1K4C  
L,1K4D C,1K4D F,1K4D I,1K4D L,2K4T A,2K58 B,2K59 B,4K5Y A,1K6L  
L,1K6L M,1K6L H,1K6N L,1K6N M,1K6N H,2K73 A,2K74 A,4K7Q A,4K7Q  
B,4K7Q C,4K7R A,4K7R B,4K7R C,1K9N A,1K9N B,1K9N C,1K9N D,1K9N  
E,2K9J A,2K9J B,2K9P A,2K9Y A,1KAD A,2KA1 A,2KA1 B,2KA2 A,2KA2  
B,1KB9 C,1KB9 D,1KB9 E,1KB9 H,1KB9 I,1KBY L,1KBY M,1KBY H,2KB7  
P,2KBV A,3KBC A,3KBC B,3KBC C,1KCH A,1KCH B,1KCH C,1KCH D,1KCH  
E,3KCU A,3KCU B,3KCU C,3KCU D,3KCU E,3KCV A,3KCV B,3KCV C,3KCV



D,3KCV E,2KDC A,2KDC B,2KDC C,3KDP C,3KDP D,3KDP H,1KF6 C,1KF6 D,1KF6 O,1KF6 P,1KFY C,1KFY D,1KFY O,1KFY P,4KFM A,4KFM C,4KFM F,4KFM J,1KG8 A,1KG8 B,1KG8 C,1KG9 A,1KG9 B,1KG9 C,1KGB A,1KGB B,1KGB C,3KG2 A,3KG2 B,3KG2 C,3KG2 D,4KHZ F,4KHZ G,2KI9 A,2KI9 B,2KI9 C,2KI9 D,4KI0 F,4KI0 G,1KJU A,3KJ6 A,4KJP A,4KJP B,4KJQ A,4KJQ B,4KJR A,4KJR C,4KJR D,4KJS A,4KJS C,4KJS D,4KJW A,4KJW B,4KK5 A,4KK5 B,4KK6 A,4KK6 B,4KK8 A,4KK8 B,4KK9 A,4KK9 B,4KKA A,4KKA B,4KKB A,4KKB B,4KKC A,4KKC B,4KKL A,4KKL B,2KLU A,3KLY A,3KLY B,3KLY C,3KLY D,3KLY E,3KLZ A,3KLZ B,3KLZ C,3KLZ D,3KLZ E,1KME A,1KMO A,1KMP A,2KNC A,4KNF A,4KNF B,4KNF C,4KNF D,4KNF E,2KOG A,1KP1 A,1KPK A,1KPK B,1KPL A,1KPL B,1KPN A,1KPW A,1KPX A,2KPE A,2KPE B,2KPF A,3KP9 A,4KPP A,1KQF B,1KQF C,1KQF E,1KQF F,1KQF H,1KQF I,1KQG B,1KQG C,1KQG E,1KQG F,1KQG H,1KQG I,4KR4 A,4KR4 B,4KR4 C,4KR8 A,4KR8 B,4KR8 C,4KRA A,4KRA B,4KRA C,2KS1 A,2KS1 B,2KS9 A,2KSA A,2KSB A,2KSD A,2KSE A,2KSF A,2KSR A,2KSY A,3KSO A,3KSO B,3KSO C,3KSS A,3KSS B,3KSS C,4KSB A,4KSC A,4KSD A,4KT0 A,4KT0 B,4KT0 F,4KT0 J,4KT0 K,4KT0 M,3KVN X,2KWX A,2KWX B,2KWX C,2KWX D,4KX6 C,4KX6 D,4KX6 O,4KX6 P,1KYK A,1KYK B,1KYK C,1KYK D,1KYK E,1KYL A,1KYL B,1KYL C,1KYL D,1KYL E,1KYO C,1KYO D,1KYO E,1KYO H,1KYO I,1KYO N,1KYO O,1KYO P,1KYO S,1KYO T,2KYH A,2KYV A,2KYV B,2KYV C,2KYV D,2KYV E,4KY0 A,4KY0 B,4KY0 C,4KYT A,4KYT B,1KZU A,1KZU B,1KZU D,1KZU E,1KZU G,1KZU H,1KZU C,1KZU F,1KZU I,1KZU J,1KZU K,1KZU L,1KZU M,1KZU N,1KZU P,1KZU Q,1KZU R,1KZU S,3KZI A,3KZI B,3KZI C,3KZI D,3KZI E,3KZI F,3KZI H,3KZI I,3KZI J,3KZI K,3KZI L,3KZI M,3KZI T,3KZI Y,3KZI X,3KZI Z,1L0L C,1L0L D,1L0L E,1L0L G,1L0L J,1L0L K,1L0M A,1L0N C,1L0N D,1L0N E,1L0N G,1L0N J,1L0N K,1L0V C,1L0V D,1L0V O,1L0V P,2L0J A,2L0J B,2L0J C,2L0J D,2L0L A,2L0M A,2L0N A,2L0O A,3L1L A,2L2T A,2L2T B,2L34 A,2L34 B,2L35 A,2L35 B,4L35 A,4L35 B,4L35 C,1L6T A,2L6W A,2L6X A,4L6R A,4L6V A,4L6V B,4L6V F,4L6V L,4L6V M,4L6V K,1L7V A,1L7V B,3L70 C,3L70 D,3L70 E,3L70 G,3L70 J,3L70 P,3L70 Q,3L70 R,3L70 T,3L70 W,3L71 C,3L71 D,3L71 E,3L71 G,3L71 J,3L71 P,3L71 Q,3L71 R,3L71 T,3L71 W,3L72 C,3L72 D,3L72 E,3L72 G,3L72 J,3L72 P,3L72 Q,3L72 R,3L72 T,3L72 W,3L73 C,3L73 D,3L73 E,3L73 G,3L73 J,3L73 P,3L73 Q,3L73 R,3L73 T,3L73 W,3L74 C,3L74 D,3L74 E,3L74 G,3L74 J,3L74 P,3L74 Q,3L74 R,3L74 T,3L74 W,3L75 C,3L75 D,3L75 E,3L75 G,3L75 J,3L75 P,3L75 Q,3L75 R,3L75 T,3L75 W,2L8S A,1L9B L,1L9B M,1L9B H,1L9H A,1L9J L,1L9J M,1L9J H,2L91 A,2L9U A,2LAT A,1LBN A,2LBG A,4LBE C,4LBE D,4LBE E,4LBE F,2LCK A,2LCX A,2LCX B,4LCU C,4LCU D,4LCU E,4LCU F,4LCZ A,4LCZ B,4LCZ C,1LDA A,1LDA B,1LDA C,1LDA D,1LDF A,1LDF B,1LDF C,1LDF D,1LDI A,1LDI B,1LDI C,1LDI D,3LDC A,3LDC B,3LDC C,3LDC D,3LDD A,3LDD B,3LDD C,3LDD D,3LDE A,3LDE B,3LDE C,3LDE D,4LDE A,4LDL A,4LDO A,4LDS A,2LEG B,3LEO A,3LEO B,3LEO C,4LEP A,4LEP B,1LGH A,1LGH B,1LGH D,1LGH E,1LGH M,1LGH N,1LGH P,1LGH Q,1LGH R,1LGH S,1LGH T,1LGH U,1LGH V,1LGH W,1LGH Y,1LGH X,2LHF A,2LJ2 A,2LKG A,2LKH A,1LLK A,1LLY A,2LLM A,2LLY A,3LLQ A,4LLH A,4LLH B,4LLH C,2LM2 A,2LME A,2LME B,2LME C,4LMJ E,4LMJ B,4LMJ C,4LMJ A,4LMJ D,4LMK A,4LMK E,4LMK C,4LMK B,4LMK D,4LML A,4LML B,4LML C,4LML D,4LML E,1LN6 A,1LNQ A,1LNQ B,1LNQ C,1LNQ D,2LNL A,3LNM B,3LNM E,3LNM F,3LNM G,2LOH A,2LOH B,2LOM A,2LOO A,2LOP A,2LOQ A,2LOR A,2LOS A,2LOT A,2LOU A,2LOV A,2LOW A,4LOU

A,4LOU B,2LP1 A,2LPF A,4LP8 A,4LP8 B,4LP8 C,4LP8 D,3LRB A,3LRB B,3LRC A,3LRC B,2LS2 A,2LS3 A,2LS4 A,3LSV A,3LSV B,3LSV C,3LSV D,3LSV E,4LSE A,4LSE B,4LSE C,4LSF A,4LSF C,4LSF D,4LSG A,4LSH A,4LSH C,4LSH D,4LSI A,4LSI B,4LSI C,2LTQ A,4LTO A,4LTO B,4LTO C,4LTO D,4LTP A,4LTP B,4LTP C,4LTP D,4LTQ A,4LTQ B,4LTQ C,4LTQ D,4LTR A,4LTR B,4LTR C,4LTR D,3LUT B,3LUT D,3LUT F,3LUT H,1LVI A,3LW5 A,3LW5 B,3LW5 F,3LW5 G,3LW5 H,3LW5 I,3LW5 J,3LW5 K,3LW5 L,3LW5 1,3LW5 2,3LW5 3,3LW5 4,4LWY H,4LWY L,4LWY M,2LX0 A,4LXJ A,2LZ3 A,2LZ3 B,2LZ4 A,2LZ4 B,2LZL A,4LZ6 A,4LZ9 A,1M0K A,1M0K B,1M0K C,1M0L A,1M0L B,1M0L C,1M0M A,1M0M B,1M0M C,2M06 A,2M07 A,2M0B A,2M0Q A,4M1M A,1M2U A,2M20 A,2M20 B,3M2L A,3M2L B,3M2L C,3M2L D,3M2L E,3M2L F,3M2L G,4M2S A,4M2T A,1M3X L,1M3X M,1M3X H,2M3B A,2M3B B,2M3B C,2M3B D,2M3B E,2M3E A,2M3G A,2M3G B,2M3G C,3M3R A,3M3R B,3M3R C,3M3R D,3M3R E,3M3R F,3M3R G,3M4D A,3M4D B,3M4D C,3M4D D,3M4D E,3M4D F,3M4D G,3M4E A,3M4E B,3M4E C,3M4E D,3M4E E,3M4E F,3M4E G,4M48 A,1M56 A,1M56 B,1M56 C,1M56 D,1M57 A,1M57 B,1M57 C,1M57 D,2M59 A,2M59 B,4M58 A,4M5B A,4M5C A,2M67 A,2M6B A,2M6I A,2M6I B,2M6I C,2M6I D,2M6I E,3M6E A,3M6E B,3M6E C,4M64 B,2M7G A,2M7X A,3M71 A,3M71 B,3M71 C,3M72 A,3M72 B,3M72 C,3M73 A,3M73 B,3M73 C,3M74 A,3M74 B,3M74 C,3M75 A,3M75 B,3M75 C,3M76 A,3M76 B,3M76 C,3M77 A,3M77 B,3M77 C,3M78 A,3M78 B,3M78 C,3M7B A,3M7B B,3M7B C,3M7C A,3M7C B,3M7C C,3M7E A,3M7E B,3M7E C,3M7L A,3M7L B,3M7L C,3M8B A,3M8D A,4M8J A,4M8J B,4M8J C,3M9C L,3M9C M,3M9C N,3M9C R,3M9I A,3M9S L,3M9S M,3M9S N,3M9S R,3M9S H,1MAL A,1MAL B,1MAL C,2MAF A,2MAW A,3MBV A,3MBV B,3MBV C,4MBS A,2MC7 A,4MD1 A,4MD1 B,4MD2 A,4MD2 B,2MET A,2MET B,2MET C,2MEU A,2MEU B,4MEE A,4MES A,2MFR A,1MGY A,2MGY A,1MHS A,1MHS B,2MHL A,4MHW A,2MIC A,2MIC B,2MJO A,4MJN A,4MJN B,4MJN C,4MJN D,4MJN E,4MJN F,4MJN G,4MJN H,4MJN I,4MJN J,4MJN K,4MJN L,4MJN M,4MJN N,2MK9 A,2MKA A,2MKA B,2MKV A,3MK7 A,3MK7 B,3MK7 C,3MK7 U,3MKT A,3MKU A,2MLH A,4MLB A,1MM4 A,1MM5 A,1MMH 1,1MMH 2,1MMH 3,1MMH 4,1MMH 5,1MMH 6,1MMH 7,2MM8 A,2MMU A,4MM4 A,4MM4 B,4MM5 A,4MM6 A,4MM7 A,4MM8 A,4MM8 B,4MM9 A,4MMA A,4MMB A,4MMC A,4MMD A,4MMD B,4MME A,4MME B,4MMF A,4MMF B,2MN6 B,2MN7 A,2MNH A,4MND A,4MND B,1MOT A,2MOF A,2MOM A,2MOM B,2MOM C,2MOZ A,1MPF A,1MPF B,1MPF C,1MPM A,1MPM B,1MPM C,1MPN A,1MPN B,1MPN C,1MPO A,1MPO B,1MPO C,1MPQ A,1MPQ B,1MPQ C,1MPR A,1MPR B,1MPR C,1MPS L,1MPS M,1MPS H,2MPN A,2MPN B,2MPR A,2MPR B,2MPR C,3MP7 A,3MP7 B,3MPN A,3MPN B,3MPQ A,3MPQ B,4MQS A,4MQT A,4MQX A,4MQX B,3MRA A,4MRN A,4MRN B,4MRP A,4MRP B,4MRR A,4MRR B,4MRS A,4MRS B,4MRV A,4MRV B,1MSR A,1MSR B,4MSW C,4MSW D,4MSW E,4MSW F,4MT0 A,4MT0 B,4MT0 C,4MT1 A,4MT1 B,4MT1 C,4MT4 A,4MT4 B,4MT4 C,4MUU A,2MV6 A,2MXB A,4MYC A,4MYC B,4MYH A,4MYH B,2N02 A,2N2L A,2N2M A,3N23 A,3N23 B,3N23 G,1N3M A,1N3M C,4N4D A,4N4R A,4N4W A,4N4Y A,4N4Y B,4N4Y C,2N5S A,3N5K A,2N6L A,2N6P A,4N6H A,1N7L A,4N74 A,4N75 A,4N7K H,4N7K L,4N7K M,4N7L H,4N7L L,4N7L M,4N7W A,4N7W B,4N7X A,3N8G A,2NA6 A,2NA6 B,2NA6 C,2NA7 A,2NA7 B,2NA7 C,3NAL A,3NAM A,3NAN A,4NAB A,3NCY A,3NCY B,4NC3 A,1ND8 A,3ND0 A,3ND0 B,1NE0 A,1NEK C,1NEK D,1NEK G,1NEK H,1NEK K,1NEK L,1NEN

C,1NEN D,1NEN G,1NEN H,1NEN K,1NEN L,3NE2 A,3NE2 B,3NE2 C,3NE2  
 D,3NE5 A,3NE5 H,3NE5 I,4NEF A,4NEF B,4NEF C,4NEF D,3NFF A,4NH2  
 A,4NH2 B,4NH2 C,4NH2 D,4NH2 E,4NH2 F,3NJT A,4NJJ A,4NJP A,1NKZ  
 A,1NKZ B,1NKZ C,1NKZ D,1NKZ E,1NKZ F,1NKZ G,1NKZ H,1NKZ I,1NKZ  
 J,1NKZ K,1NKZ L,1NKZ M,1NKZ N,1NKZ P,1NKZ Q,1NKZ R,1NKZ S,3NK5  
 A,3NKA A,3NKA C,3NKA D,3NKA E,3NKC A,3NKC C,3NKC D,3NKC E,2NLJ  
 C,2NLJ D,2NLJ E,2NLJ F,2NMR A,2NMR B,2NMR C,3NMO A,2NOP A,2NOP  
 B,2NOP C,2NOW A,2NOW B,2NOW C,3NOC A,3NOC B,3NOC C,3NOG  
 A,3NOG B,3NOG C,2NPC A,2NPC B,2NPC C,2NPD A,2NPD B,2NPD C,2NPE  
 A,2NPE B,2NPE C,2NPG A,2NPG B,2NPG C,2NPJ A,2NPJ B,2NPJ C,2NPK  
 A,2NPK B,2NPK C,4NPP A,4NPP B,4NPP C,4NPP D,4NPP E,1NQE A,1NQF  
 A,1NQG A,1NQH A,2NQ2 A,2NQ2 B,2NR1 A,2NR9 A,2NRF A,2NRF D,2NRF  
 C,2NRG A,2NS1 A,2NS1 C,2NS1 E,3NS0 A,3NS0 B,3NS0 C,3NSB A,3NSB  
 B,3NSB C,3NSG A,3NSG B,3NSG C,1NTK C,1NTK D,1NTK E,1NTK G,1NTK  
 J,1NTK K,1NTM C,1NTM D,1NTM E,1NTM G,1NTM J,1NTM K,1NTZ C,1NTZ  
 D,1NTZ E,1NTZ G,1NTZ J,1NTZ K,2NTU A,2NTU B,2NTU C,2NTW A,2NTW  
 B,2NTW C,4NTA A,4NTA B,4NTA C,4NTB A,4NTB B,4NTB C,4NTF A,4NTF  
 B,4NTF C,4NTJ A,4NTW A,4NTW D,4NTW G,4NTX A,4NTX D,4NTX G,4NTY  
 A,4NTY D,4NTY G,1NU1 C,1NU1 D,1NU1 E,1NU1 G,1NU1 J,1NU1 K,2NUU  
 A,2NUU B,2NUU C,4NV2 A,4NV5 A,4NV6 A,1NW0 A,1NW0 B,2NWL A,2NWL  
 B,2NWL C,2NWW A,2NWW B,2NWW C,2NWX A,2NWX B,2NWX C,3NY8  
 A,3NY9 A,3NYA A,3NYM A,4NYK A,4NYK B,4NYK C,1O0A A,1O0A B,1O0A  
 C,2O01 A,2O01 B,2O01 F,2O01 G,2O01 H,2O01 I,2O01 J,2O01 L,2O01  
 1,2O01 2,2O01 3,2O01 4,3O0E A,3O0R B,3O0R C,2O4V A,2O4V B,2O4V  
 C,3O44 A,3O44 B,3O44 C,3O44 D,3O44 E,3O44 F,3O44 G,1O5W A,2O5P  
 A,4O6M A,4O6M B,4O6N A,4O6N B,4O6Y A,4O6Y B,2O7L A,3O7P A,3O7Q  
 A,4O79 A,4O79 B,4O7G A,4O7G B,2O9D A,2O9E A,2O9E B,2O9E C,2O9E  
 D,2O9F A,2O9G A,2O9G B,2O9G C,2O9G D,2O9J A,4O93 A,4O93 B,4O93  
 C,4O93 D,4O9P C,4O9P D,4O9P A,4O9P B,4O9R A,4O9T A,4O9T B,4O9T  
 C,4O9T D,4O9U A,4O9U B,4O9U C,4O9U D,2OAR A,2OAR B,2OAR  
 C,2OAR D,2OAR E,2OAU A,2OAU B,2OAU C,2OAU D,2OAU E,2OAU F,2OAU  
 G,3OAX A,3OAX C,4OAA A,3OB6 A,3OB6 B,1OCC A,1OCC B,1OCC C,1OCC  
 D,1OCC G,1OCC I,1OCC J,1OCC K,1OCC L,1OCC M,1OCC N,1OCC  
 O,1OCC P,1OCC Q,1OCC T,1OCC V,1OCC W,1OCC X,1OCC Y,1OCC  
 Z,1OCO A,1OCO B,1OCO C,1OCO D,1OCO G,1OCO I,1OCO J,1OCO  
 K,1OCO L,1OCO M,1OCO N,1OCO O,1OCO P,1OCO Q,1OCO T,1OCO  
 V,1OCO W,1OCO X,1OCO Y,1OCO Z,1OCR A,1OCR B,1OCR C,1OCR  
 D,1OCR G,1OCR I,1OCR J,1OCR K,1OCR L,1OCR M,1OCR N,1OCR  
 O,1OCR P,1OCR Q,1OCR T,1OCR V,1OCR W,1OCR X,1OCR Y,1OCR  
 Z,1OCZ A,1OCZ B,1OCZ C,1OCZ D,1OCZ G,1OCZ I,1OCZ J,1OCZ K,1OCZ  
 L,1OCZ M,1OCZ N,1OCZ O,1OCZ P,1OCZ Q,1OCZ T,1OCZ V,1OCZ W,1OCZ  
 X,1OCZ Y,1OCZ Z,2OCC A,2OCC B,2OCC C,2OCC D,2OCC G,2OCC I,2OCC  
 J,2OCC K,2OCC L,2OCC M,2OCC N,2OCC O,2OCC P,2OCC Q,2OCC  
 T,2OCC V,2OCC W,2OCC X,2OCC Y,2OCC Z,2ODJ A,3ODJ A,3ODU  
 A,3ODU B,4OD4 A,4OD5 A,1OEA A,1OED A,1OED B,1OED C,1OED D,1OED  
 E,3OE0 A,3OE0 B,3OE6 A,3OE6 B,3OE8 B,3OE8 C,3OE9 A,3OE9 B,1OGV  
 H,1OGV L,1OGV M,3OGC C,3OGC D,3OGC E,3OGC F,4OGQ A,4OGQ  
 B,4OGQ C,4OGQ D,4OGQ E,4OGQ F,4OGQ G,4OGQ H,4OGQ I,4OGQ  
 J,4OGQ K,4OGQ L,4OGQ M,4OGQ N,4OGQ O,4OGQ P,1OH2 P,1OH2  
 Q,1OH2 R,3OHN A,1OJ9 A,1OJA A,1OJC A,4OJ2 X,4OJ2 A,4OJ2 B,4OJ2

C,1OKC A,2OMF A,2OMF B,2OMF C,3OM3 A,3OM3 B,3OMA A,3OMA B,3OMI A,3OMI B,3OMN A,3OMN B,2ONJ A,2ONJ B,2ONK C,2ONK D,1OPF A,1OPF B,1OPF C,1OPN A,1ORM A,1ORQ C,1ORQ D,1ORQ E,1ORQ F,1ORS C,3OR6 C,3OR6 D,3OR6 E,3OR6 F,3OR7 C,3OR7 D,3OR7 E,3OR7 F,3ORG A,4OR2 A,4OR2 B,1OSM A,1OSM B,1OSM C,1OTS A,1OTS B,1OTT A,1OTT B,1OTU A,1OTU B,3OUF A,3OUF C,3OUF D,3OUF E,3OUS A,3OUS B,3OUS C,3OUS D,1OV0 A,1OV1 A,4OV0 A,4OV0 B,4OV0 C,4OXS A,4OXS B,4OXS E,4OXS F,1OY6 A,1OY6 B,1OY6 C,1OY8 A,1OY8 B,1OY8 C,1OY9 A,1OY9 B,1OY9 C,1OYD A,1OYD B,1OYD C,1OYE A,1OYE B,1OYE C,4OYE A,4OYE B,4OYE C,4OYF A,4OYF B,4OYF C,4OYG A,4OYG B,4OYG C,1OZ5 A,1OZC A,3P03 A,3P03 B,3P03 C,3P0G A,4P00 A,4P00 B,4P02 A,4P02 B,4P19 A,4P19 B,4P19 C,4P1A A,4P1A B,4P1A C,4P2Z A,4P2Z B,4P2Z E,4P2Z F,4P30 A,4P30 B,4P30 E,4P30 F,4P3J A,4P3J B,4P3J C,1P49 A,1P4T A,1P4T B,1P4T C,3P4P C,3P4P D,3P4P O,3P4P P,3P4Q C,3P4Q D,3P4Q O,3P4Q P,3P4R C,3P4R D,3P4R O,3P4R P,3P4S C,3P4S D,3P4S O,3P4S P,3P4W A,3P4W B,3P4W C,3P4W D,3P4W E,3P50 A,3P50 B,3P50 C,3P50 D,3P50 E,3P5N A,4P6H A,4P6H B,4P6H C,4P6J A,4P6J B,4P6K A,4P6K B,4P6L A,4P6L B,4P6V B,4P6V C,4P6V D,4P6V E,4P6V F,1P7B A,1P7B B,1P7B C,1P7B D,2P7T C,2P7T D,2P7T E,2P7T F,4P79 A,1P84 C,1P84 D,1P84 E,1P84 H,1P84 I,1P84 N,1P84 P,1P84 Q,1P84 T,1P84 U,1P8H A,1P8H B,1P8H C,1P8I A,1P8I B,1P8I C,1P8U A,1P8U B,1P8U C,4P9O A,4P9O B,4P9O E,4P9O F,4P9P A,4P9P B,4P9P E,4P9P F,4PA3 A,4PA3 B,4PA3 E,4PA3 F,4PA4 A,4PA4 B,4PA4 E,4PA4 F,4PA6 A,4PA6 B,4PA6 E,4PA6 F,4PA7 A,4PA7 B,4PA7 E,4PA7 F,4PA9 A,4PA9 B,4PA9 E,4PA9 F,1PB2 A,1PB4 C,1PB4 D,3PBL A,4PB1 A,4PB1 B,4PB1 C,4PB2 A,4PB2 B,4PB2 C,4PBU A,4PBU B,4PBU C,4PBU D,4PBU E,4PBU F,4PBU H,4PBU I,4PBU J,4PBU K,4PBU L,4PBU M,4PBU T,4PBU Y,4PBU X,4PBU Z,4PBU A,4PBU B,4PBU C,4PBU D,4PBU E,4PBU F,4PBU H,4PBU I,4PBU J,4PBU K,4PBU L,4PBU M,4PBU T,4PBU Y,4PBU X,4PBU Z,1PCR L,1PCR M,1PCR H,3PCQ A,3PCQ B,3PCQ F,3PCQ I,3PCQ J,3PCQ K,3PCQ L,3PCQ M,3PCQ X,3PCV A,3PCV B,3PCV C,3PDS A,4PD4 C,4PD4 D,4PD4 E,4PD4 H,4PD4 I,4PD5 A,4PD5 B,4PD5 C,4PD6 A,4PD6 B,4PD6 C,4PD7 A,4PD7 B,4PD7 C,4PD8 A,4PD8 B,4PD8 C,4PD9 A,4PD9 B,4PD9 C,4PDA A,4PDA B,4PDA C,4PDL A,4PDL C,4PDL D,4PDL E,4PDM A,4PDM C,4PDM D,4PDM E,4PDR B,4PDR F,4PDR G,4PDR H,4PDV A,4PDV C,4PDV D,4PDV E,2PED A,4PE5 A,4PE5 B,4PE5 C,4PE5 D,3PF1 A,3PGR A,3PGS A,3PGU A,4PGR A,4PGS A,4PGU A,4PGV A,4PGW A,1PHO A,1PHO B,1PHO C,4PHU A,4PHZ D,4PHZ H,4PHZ K,4PHZ N,4PHZ A,4PHZ B,4PHZ E,4PHZ I,4PHZ F,4PHZ J,4PHZ C,4PHZ G,3PIK A,3PIK B,3PIK C,4PI0 D,4PI0 H,4PI0 F,4PI0 K,4PI0 E,4PI0 N,4PI0 A,4PI0 I,4PI0 C,4PI0 G,4PI0 J,4PI0 B,4PI2 D,4PI2 H,4PI2 F,4PI2 E,4PI2 N,4PI2 A,4PI2 I,4PI2 G,4PI2 J,4PI2 B,4PI2 K,4PI2 C,4PIR A,4PIR B,3PJS K,3PJS L,3PJS M,3PJS N,3PJZ A,3PJZ B,4PJ0 A,4PJ0 B,4PJ0 C,4PJ0 D,4PJ0 E,4PJ0 F,4PJ0 H,4PJ0 I,4PJ0 J,4PJ0 K,4PJ0 L,4PJ0 M,4PJ0 T,4PJ0 Y,4PJ0 X,4PJ0 Z,4PJ0 A,4PJ0 B,4PJ0 C,4PJ0 D,4PJ0 E,4PJ0 F,4PJ0 H,4PJ0 I,4PJ0 J,4PJ0 K,4PJ0 L,4PJ0 M,4PJ0 T,4PJ0 X,4PJ0 R,4PJ0 R,4PJ0 Y,4PJ0 Z,1PLN A,1PLN B,1PLN C,1PLN D,1PLN E,3PL9 A,4PL0 A,4PL0 B,1PNZ A,2PNO A,2PNO B,2PNO C,1PO0 A,1PO3 A,2POR A,2POR B,2POR C,3PO7 A,3POQ A,3POQ B,3POQ C,3POR A,3POR B,3POR C,3POU A,3POU B,3POU C,3POX A,3POX B,3POX C,4POP A,4POV A,1PP9 C,1PP9 D,1PP9 E,1PP9 G,1PP9 J,1PP9 P,1PP9 Q,1PP9 R,1PP9 T,1PP9 W,1PPJ C,1PPJ

D,1PPJ E,1PPJ G,1PPJ P,1PPJ Q,1PPJ R,1PPJ T,1PPJ W,2PPS A,2PPS  
 B,2PPS L,2PPS K,2PPS F,3PQR A,1PRC L,1PRC M,1PRC H,1PRN A,1PRN  
 B,1PRN C,2PRC L,2PRC M,2PRC H,2PRN A,2PRN B,2PRN C,3PRC L,3PRC  
 M,3PRC H,3PRN A,3PRN B,3PRN C,4PR7 A,5PRC L,5PRC M,5PRC H,5PRN  
 A,5PRN B,5PRN C,6PRC L,6PRC M,6PRC H,6PRN A,6PRN B,6PRN C,7PRC  
 L,7PRC M,7PRC H,7PRN A,7PRN B,7PRN C,8PRN A,8PRN B,8PRN C,1PSL  
 A,1PSL B,1PSL C,1PSL D,1PSL E,1PSS L,1PSS M,1PSS H,1PST L,1PST  
 M,1PST H,3PUV F,3PUV G,3PUW F,3PUW G,3PUX F,3PUX G,3PUY F,3PUY  
 G,3PUZ F,3PUZ G,1PV6 A,1PV7 A,3PV0 F,3PV0 G,4PV1 A,4PV1 B,4PV1  
 C,4PV1 D,4PV1 E,4PV1 F,4PV1 G,4PV1 H,4PV1 I,4PV1 J,4PV1 K,4PV1  
 L,4PV1 M,4PV1 N,4PV1 O,4PV1 P,1PW4 A,3PWH A,1PXR A,1PXR D,1PXR  
 C,1PXS A,1PXS D,1PXS C,3PXO A,4PX7 A,4PXF A,4PXF C,4PXK A,4PXK  
 B,4PXK C,4PXZ A,1PY6 A,1PY6 D,1PY6 C,1PYH A,1PYH B,1PYH C,1PYH  
 D,1PYH E,1PYH F,1PYH G,1PYH H,1PYH I,1PYH J,1PYH K,1PYH L,1PYH  
 M,1PYH N,1PYH O,1PYH P,1PYH Q,1PYH R,1PYH S,1PYH T,1PYH U,1PYH  
 V,1PYH W,1PYH X,1PYH Y,1PYH Z,1PYH 1,1PYH 2,1PYH 3,1PYH 4,1PYH  
 5,1PYH 6,1PYH 7,1PYH 8,4PY0 A,4PYP A,1Q16 C,1Q16 F,3Q17 A,3Q17  
 B,4Q2E A,4Q2E B,4Q2G A,4Q2G B,4Q35 A,4Q4A A,4Q4A B,4Q4H A,4Q4H  
 B,4Q4J A,4Q4J B,1Q5I A,1Q5I D,1Q5I C,1Q5J A,1Q5J D,1Q5J C,2Q67  
 A,2Q67 B,2Q67 C,2Q67 D,2Q68 A,2Q68 B,2Q68 C,2Q68 D,2Q69 A,2Q69  
 B,2Q69 C,2Q69 D,2Q6A A,2Q6A B,2Q6A C,2Q6A D,2Q6H A,4Q65 A,2Q72  
 A,2Q72 B,2Q7M A,2Q7M B,2Q7M C,2Q7R A,2Q7R B,2Q7R C,3Q7K A,3Q7K  
 B,3Q7K C,3Q7K D,3Q7K E,4Q7C A,4Q7C B,1Q90 A,1Q90 B,1Q90 D,1Q90  
 R,1Q90 G,1Q90 L,1Q90 M,1Q90 N,1Q90 E,1Q90 F,1Q90 I,1Q90 J,1Q90  
 K,1Q90 O,1Q90 P,1Q90 Q,1Q9F A,1Q9G A,4Q9H A,4Q9I A,4Q9J A,4Q9K  
 A,4Q9L A,3QAK A,3QAP A,2QB4 A,2QB4 B,3QBG A,3QBG B,3QBG D,3QBI  
 A,3QBI B,3QBI D,3QBK A,3QBK B,3QBK D,3QBL A,3QBL B,3QBL D,1QCR  
 C,1QCR D,1QCR E,1QCR G,1QCR J,1QCR K,1QD5 A,1QD6 C,1QD6 D,3QDC  
 A,4QD6 A,2QE1 A,2QE1 B,3QE7 A,3QE7 B,4QE7 A,4QE7 B,4QE7 C,4QE7  
 D,4QE9 A,4QE9 B,4QE9 C,4QE9 D,1QFF A,1QFG A,2QFI A,3QF4 A,3QF4  
 B,1QHJ A,1QHJ B,1QHJ C,4QH1 A,4QH1 B,4QH1 C,4QH1 D,4QH1 E,4QH4  
 A,4QH4 B,4QH4 C,4QH4 D,4QH4 E,4QH5 A,4QH5 B,4QH5 C,4QH5 D,4QH5  
 E,2QI9 A,2QI9 B,4QI1 A,4QI1 B,4QI1 C,4QID A,4QIM A,4QIN A,4QIN B,4QIQ  
 A,1QJ8 A,1QJ9 A,1QJP A,1QJQ A,2QJK A,2QJK B,2QJK C,2QJK D,2QJK  
 E,2QJK F,2QJP A,2QJP B,2QJP C,2QJP D,2QJP E,2QJP F,2QJU A,2QJY  
 A,2QJY B,2QJY C,2QJY D,2QJY E,2QJY F,3QJQ A,3QJQ B,3QJQ C,3QJR  
 A,3QJR B,3QJR C,3QJS A,3QJS B,3QJS C,3QJT A,3QJT B,3QJT C,3QJU  
 A,3QJU B,3QJU C,3QJV A,3QJV B,3QJV C,1QKC A,1QKO A,1QKO B,1QKO  
 C,1QKP A,2QKS A,2QKS C,2QKS D,2QKS E,4QKX A,4QKY A,1QLB C,1QLB  
 F,1QLE A,1QLE B,1QLE C,1QLE D,3QLB A,3QLB B,4QL0 A,1QM8 A,1QM8  
 B,1QM8 C,3QNN A,3QNN B,4QNC A,4QNC B,4QND A,4QND B,4QNZ  
 A,1QO1 K,1QO1 L,1QO1 M,1QO1 N,1QO1 O,1QO1 P,1QO1 Q,1QO1 R,1QO1  
 S,1QO1 T,1QOV L,1QOV M,1QOV H,2QOM A,4QO0 A,4QO0 B,4QO2  
 A,2QPD A,2QPD B,2QPD C,2QPE A,2QPE B,2QPE C,3QQ2 A,3QRA A,3QRC  
 A,4QRY A,4QRY B,4QRY C,3QS4 A,3QS4 B,3QS5 A,3QS5 B,3QS6 A,3QS6  
 B,2QTK A,2QTO A,2QTO B,2QTO C,2QTO D,2QTS A,2QTS B,2QTS C,4QTN  
 A,4QTN B,4QTN C,4QUV A,4R0C A,4R0C B,4R1I A,4R1I B,1R2C L,1R2C  
 M,1R2C H,1R2N A,1R3I C,1R3I D,1R3I G,1R3I K,1R3J C,1R3J F,1R3J I,1R3J  
 L,1R3K C,1R3K F,1R3K I,1R3K L,1R3L C,1R3L F,1R3L I,1R3L L,2R4L B,2R4N  
 A,2R4O A,2R4P A,2R4R A,2R4S A,4R50 A,4R50 C,4R50 D,4R50 E,2R6G

F,2R6G G,3R65 A,3R65 B,3R65 C,3R65 D,4R6Z A,4R6Z C,4R6Z D,4R6Z  
E,4R7C A,4R7C B,4R7C E,4R7C F,1R84 A,2R88 A,2R89 A,2R8A A,4R8C  
A,4R8C C,4R8C D,4R8C E,2R9H A,2R9H B,2R9R B,2R9R C,2R9R D,2R9R  
E,4R9U A,4R9U B,4RAI A,4RAI C,4RAI D,4RAI E,3RBH A,1RC2 B,2RCR  
L,2RCR M,2RCR H,3RCE A,4RCR L,4RCR M,4RCR H,2RDD A,2RDD B,2RDD  
C,2RDD D,2RDD E,2RDD F,4RDQ A,4RDQ B,4RDQ C,4RDQ D,4RDQ  
E,4RDR A,4RDT A,3REY A,4RES A,4RES B,4RES G,4RET A,4RET B,4RET  
G,4RET E,3RFM A,3RFU A,3RFZ B,4RFS S,4RFS T,1RG5 L,1RG5 M,1RG5  
H,1RGN L,1RGN M,1RGN H,3RGB A,3RGB B,3RGB C,3RGB E,3RGB I,3RGB  
J,3RGB F,3RGB K,3RGB G,3RGM A,3RGN A,1RH5 A,1RH5 B,1RH5 C,1RHZ  
A,1RHZ B,1RHZ C,2RH1 A,3RHW A,3RHW B,3RHW C,3RHW D,3RHW  
E,4RHB A,3RI5 A,3RI5 B,3RI5 C,3RI5 D,3RI5 E,3RIA A,3RIA B,3RIA C,3RIA  
D,3RIA E,3RIF A,3RIF B,3RIF C,3RIF D,3RIF E,4RI2 A,4RI2 B,4RI3 A,4RI3  
B,4RJW A,4RJW B,4RJW C,4RJX A,4RJX B,4RJX C,1RKL A,3RKO L,3RKO  
M,3RKO N,3RKO K,3RKO A,3RKO J,3RLB A,3RLF F,3RLF G,4RL8 A,4RL9  
A,4RLB A,4RLB B,4RLC A,2RMZ A,2RN0 A,4RNG A,4RNG C,4RO2 A,4RO2  
B,4RO2 E,4RO2 F,4RP8 A,4RP8 C,4RP9 A,4RP9 B,1RQK L,1RQK M,1RQK  
H,3RQU A,3RQU B,3RQU C,3RQU D,3RQU E,3RQW A,3RQW B,3RQW  
C,3RQW D,3RQW E,4RUE A,4RUE B,4RUF A,4RUF B,1RVJ L,1RVJ M,1RVJ  
H,3RVY A,3RVY B,3RVY C,3RVY D,3RVZ A,3RVZ B,3RVZ C,3RVZ D,4RVW  
A,4RVY A,4RVY A,4RVY B,4RVY B,4RVY C,4RVY C,4RVY D,4RVY D,4RVY  
E,4RVY E,4RVY F,4RVY F,4RVY H,4RVY H,4RVY I,4RVY I,4RVY J,4RVY  
J,4RVY K,4RVY K,4RVY L,4RVY L,4RVY M,4RVY M,4RVY T,4RVY T,4RVY  
X,4RVY X,4RVY Y,4RVY Y,4RVY Z,4RVY Z,1RWT B,1RWT F,1RWT G,3RW0  
A,3RW0 B,3RW0 C,3RW0 D,4RWA A,4RWA B,4RWD A,4RWD B,1RY5  
L,1RY5 M,1RY5 H,4RY2 A,4RY2 B,4RYI A,4RYI B,4RYJ A,4RYJ B,4RYM  
A,4RYN A,4RYO A,4RYQ A,4RYR A,1RZH L,1RZH M,1RZH H,1RZZ L,1RZZ  
M,1RZZ H,3RZE A,1S00 L,1S00 M,1S00 H,3S0X A,3S0X B,4S0F A,4S0F  
B,4S0V A,1S2Q A,1S2Y A,1S33 A,1S33 B,1S33 C,1S33 D,1S3B A,1S3E  
A,3S33 A,3S33 B,3S33 C,3S38 A,3S38 B,3S38 C,3S39 A,3S39 B,3S39  
C,3S3A A,3S3A B,3S3A C,3S3B A,3S3B B,3S3B C,3S3C A,3S3C B,3S3C  
C,3S3D A,3S3D B,3S3D C,3S3W A,3S3W B,3S3W C,3S3X A,3S3X B,3S3X  
C,1S51 A,1S51 C,1S51 E,1S52 A,1S53 A,1S53 C,1S53 E,1S54 A,1S54  
C,1S54 E,1S5H C,1S5H F,1S5H I,1S5H L,1S5L A,1S5L B,1S5L C,1S5L  
D,1S5L E,1S5L F,1S5L H,1S5L I,1S5L J,1S5L K,1S5L L,1S5L M,1S5L T,1S5L  
X,1S5L N,1S5L Z,1S5L A,1S5L B,1S5L C,1S5L D,1S5L E,1S5L F,1S5L  
H,1S5L I,1S5L J,1S5L K,1S5L L,1S5L M,1S5L T,1S5L X,1S5L N,1S5L Z,1S6E  
A,1S8J A,1S8L A,3S8F A,3S8F B,3S8F C,3S8G A,3S8G B,3S8G C,3SFD  
C,3SFD D,3SFE C,3SFE D,1SIW C,1SIW F,1SKH A,3SLJ A,3SLO A,3SLT  
A,3SN6 R,1SOR A,1SOR B,1SOR C,1SOR D,3SPC A,3SPC B,3SPC C,3SPC  
D,3SPG A,3SPG B,3SPG C,3SPG D,3SPH A,3SPH B,3SPH C,3SPH D,3SPI  
A,3SPI B,3SPI C,3SPI D,3SPJ A,3SPJ B,3SPJ C,3SPJ D,1SQB C,1SQB  
D,1SQB E,1SQB G,1SQB J,1SQB K,1SQP C,1SQP D,1SQP E,1SQP G,1SQP  
J,1SQP K,1SQQ C,1SQQ D,1SQQ E,1SQQ G,1SQQ J,1SQQ K,1SQV C,1SQV  
D,1SQV E,1SQV G,1SQV J,1SQV K,1SQX C,1SQX E,1SQX D,1SQX G,1SQX  
K,1SQX J,1SR1 A,3STL C,3STL D,3STL E,3STL F,3STZ C,3STZ D,3STZ  
E,3STZ F,1SU4 A,1SUK A,3SY7 A,3SY9 A,3SYA A,3SYA B,3SYA C,3SYA  
D,3SYB A,3SYC A,3SYC B,3SYC C,3SYC D,3SYO A,3SYO B,3SYO C,3SYO  
D,3SYP A,3SYP B,3SYP C,3SYP D,3SYQ A,3SYQ B,3SYQ C,3SYQ D,3SYS  
A,3SZD B,3SZV A,3T0S A,1T16 A,1T1L A,1T1L B,3T1C A,3T1C C,3T1C

D,3T1C E,3T20 A,3T24 A,3T2M A,3T2M C,3T2M D,3T2M E,3T45 A,3T45  
 B,3T45 C,3T4D B,3T4D F,3T4D G,3T4D H,3T4Z A,3T4Z C,3T4Z D,3T4Z  
 E,1T5S A,1T5T A,3T51 A,3T51 F,3T51 I,3T53 A,3T53 F,3T53 I,3T56 A,3T56  
 D,3T56 G,3T6D H,3T6D L,3T6D M,3T6E H,3T6E L,3T6E M,1T78 A,1T9T  
 A,1T9T B,1T9T C,1T9U A,1T9U B,1T9U C,1T9V A,1T9V B,1T9V C,1T9W  
 A,1T9W B,1T9W C,1T9X A,1T9X B,1T9X C,1T9Y A,1T9Y B,1T9Y C,3T9N  
 A,3T9N B,3T9N C,3T9N D,3T9N E,3T9N F,3T9N G,3TCU A,3TCU C,3TCU  
 D,3TCU E,3TDO A,3TDO B,3TDO C,3TDO D,3TDO E,3TDP A,3TDP B,3TDP  
 C,3TDP D,3TDP E,3TDR A,3TDR B,3TDR C,3TDR D,3TDR E,3TDS E,3TDS  
 A,3TDS B,3TDS C,3TDS D,3TDX A,3TDX B,3TDX C,3TDX D,3TDX E,3TE0  
 A,3TE0 B,3TE0 C,3TE0 D,3TE0 E,3TE1 A,3TE1 B,3TE1 C,3TE1 D,3TE1  
 E,3TE2 A,3TE2 B,3TE2 C,3TE2 D,3TE2 E,3TET A,3TET C,3TET D,3TET  
 E,1THQ A,3TIJ A,3TIJ B,3TIJ C,4TKQ A,4TKR A,1TLW A,1TLY A,1TLZ  
 A,3TLM A,3TLS A,3TLS B,3TLS C,3TLS D,3TLS E,3TLT A,3TLT B,3TLT  
 C,3TLT D,3TLT E,3TLU A,3TLU B,3TLU C,3TLU D,3TLU E,3TLV A,3TLV  
 B,3TLV C,3TLV D,3TLV E,3TLW A,3TLW B,3TLW C,3TLW D,3TLW E,4TL3  
 A,4TL3 B,4TLL A,4TLL B,4TLL C,4TLL D,4TLM A,4TLM B,4TLM C,4TLM  
 D,1TN0 A,1TN0 D,1TN0 C,1TN5 A,1TN5 D,1TN5 C,4TNH A,4TNH B,4TNH  
 C,4TNH D,4TNH E,4TNH F,4TNH H,4TNH I,4TNH J,4TNH K,4TNH L,4TNH  
 M,4TNH T,4TNH Y,4TNH X,4TNH Y,4TNH Z,4TNH A,4TNH B,4TNH C,4TNH  
 D,4TNH E,4TNH F,4TNH H,4TNH I,4TNH J,4TNH K,4TNH L,4TNH M,4TNH  
 T,4TNH G,4TNH X,4TNH G,4TNH Z,4TNI A,4TNI B,4TNI C,4TNI D,4TNI  
 E,4TNI F,4TNI H,4TNI I,4TNI J,4TNI K,4TNI L,4TNI M,4TNI T,4TNI Y,4TNI  
 X,4TNI Y,4TNI Z,4TNI A,4TNI B,4TNI C,4TNI D,4TNI E,4TNI F,4TNI H,4TNI  
 I,4TNI J,4TNI K,4TNI L,4TNI M,4TNI T,4TNI G,4TNI X,4TNI G,4TNI Z,4TNJ  
 A,4TNJ B,4TNJ C,4TNJ D,4TNJ E,4TNJ F,4TNJ H,4TNJ I,4TNJ J,4TNJ K,4TNJ  
 L,4TNJ M,4TNJ T,4TNJ Y,4TNJ X,4TNJ Y,4TNJ Z,4TNJ A,4TNJ B,4TNJ  
 C,4TNJ D,4TNJ E,4TNJ F,4TNJ H,4TNJ I,4TNJ J,4TNJ K,4TNJ L,4TNJ  
 M,4TNJ T,4TNJ G,4TNJ X,4TNJ G,4TNJ Z,4TNK A,4TNK B,4TNK C,4TNK  
 D,4TNK E,4TNK F,4TNK H,4TNK I,4TNK J,4TNK K,4TNK L,4TNK M,4TNK  
 T,4TNK Y,4TNK X,4TNK Y,4TNK Z,4TNK A,4TNK B,4TNK C,4TNK D,4TNK  
 E,4TNK F,4TNK H,4TNK I,4TNK J,4TNK K,4TNK L,4TNK M,4TNK T,4TNK  
 G,4TNK X,4TNK G,4TNK Z,4TNV A,4TNV B,4TNV C,4TNV D,4TNV E,4TNW  
 A,4TNW B,4TNW C,4TNW D,4TNW E,4TPG A,4TPG B,4TPH A,4TPH B,4TPJ  
 A,4TPJ B,1TQQ A,1TQQ B,1TQQ C,4TQ3 A,4TQ4 A,4TQ5 A,4TQ6 A,4TQQ  
 H,4TQQ L,4TQQ M,4TQU M,4TQU N,4TQV A,4TQV B,4TSY A,4TSY B,3TT1  
 A,3TT1 B,3TT3 A,3TT3 B,3TU0 A,3TU0 B,3TUI A,3TUI B,3TUJ A,3TUJ  
 B,3TUZ A,3TUZ B,4TWD A,4TWD B,4TWD C,4TWD D,4TWD E,4TWF  
 A,4TWF B,4TWF C,4TWF D,4TWF E,4TWH A,4TWH B,4TWH C,4TWH  
 D,4TWH E,4TWK A,4TWK B,1TXH A,1TXH B,1TXH C,1TXH D,1TXH E,1TXH  
 F,3TX3 A,3TXT A,3TXT B,3TXT C,1U19 A,4U14 A,4U15 A,4U16 A,4U1W  
 A,4U1W B,4U1W C,4U1W D,4U1X A,4U1X B,4U1X C,4U1X D,4U1Y A,4U1Y  
 B,4U1Y C,4U1Y D,3U2F K,3U2F L,3U2F M,3U2F N,3U2F O,3U2F A,3U2F  
 B,3U2F C,3U2F D,3U2F E,3U2Y K,3U2Y L,3U2Y M,3U2Y N,3U2Y O,3U2Y  
 A,3U2Y B,3U2Y C,3U2Y D,3U2Y E,4U2P A,4U2P B,4U2P D,4U2P C,4U2Q  
 A,4U2Q B,4U2Q C,4U2Q D,3U32 K,3U32 L,3U32 M,3U32 N,3U32 O,3U32  
 A,3U32 B,3U32 C,3U32 D,3U32 E,4U3F C,4U3F D,4U3F E,4U3F G,4U3F  
 J,4U3F P,4U3F Q,4U3F R,4U3F T,4U3F W,4U4F A,4U4F B,4U4F C,4U4F  
 D,4U4G A,4U4G B,4U4G C,4U4G D,4U4T A,4U4V A,4U4W A,4U4W B,1U5N  
 A,4U5B A,4U5B B,4U5B C,4U5B D,4U5C A,4U5C B,4U5C C,4U5C D,4U5D

A,4U5D B,4U5D C,4U5D D,4U5E A,4U5E B,4U5E C,4U5E D,4U5F A,4U5F B,4U5F C,4U5F D,1U77 A,1U77 B,1U77 C,1U7C A,1U7C B,1U7C C,1U7G A,1U7G B,1U7G C,4U8V A,4U8V B,4U8Y A,4U8Y B,4U95 A,4U95 B,4U96 A,4U96 B,4U96 C,4U9L A,4U9L B,4U9N A,4U9N B,1UAZ A,1UAZ C,1UAZ F,3UBB A,3UBB B,3UBB C,4UB6 A,4UB6 B,4UB6 C,4UB6 D,4UB6 E,4UB6 F,4UB6 H,4UB6 I,4UB6 J,4UB6 K,4UB6 L,4UB6 M,4UB6 T,4UB6 Y,4UB6 X,4UB6 Z,4UB6 R,4UB6 A,4UB6 B,4UB6 C,4UB6 D,4UB6 E,4UB6 F,4UB6 H,4UB6 I,4UB6 J,4UB6 K,4UB6 L,4UB6 M,4UB6 T,4UB6 Y,4UB6 X,4UB6 Z,4UB8 A,4UB8 B,4UB8 C,4UB8 D,4UB8 E,4UB8 F,4UB8 H,4UB8 I,4UB8 J,4UB8 K,4UB8 L,4UB8 M,4UB8 T,4UB8 Y,4UB8 X,4UB8 Z,4UB8 R,4UB8 A,4UB8 B,4UB8 C,4UB8 D,4UB8 E,4UB8 F,4UB8 H,4UB8 I,4UB8 J,4UB8 K,4UB8 L,4UB8 M,4UB8 T,4UB8 Y,4UB8 X,4UB8 Z,1UCQ A,1UCQ B,1UCQ C,4UC1 A,4UC1 B,4UC2 A,4UC2 B,4UC3 A,4UC3 B,3UD0 K,3UD0 L,3UD0 M,3UD0 N,3UD0 O,3UD0 A,3UD0 B,3UD0 C,3UD0 D,3UD0 E,3UDC A,3UDC B,3UDC C,3UDC D,3UDC E,3UDC F,3UDC G,1UFD A,1UFD B,1UFD C,1UFD D,3UG9 A,3UG9 B,4UG2 A,4UHR A,4UIS A,4UIS B,4UIS C,4UIS D,1UJW A,3UKM A,3UKM B,1UMX H,1UMX L,1UMX M,3UM7 A,3UM7 B,4UMV A,4UMW A,3UON A,1UPE A,3UPG A,3UPG B,3UPG C,4UP6 A,4UP6 B,4UP6 C,3UQ4 A,3UQ4 B,3UQ4 C,3UQ4 D,3UQ4 E,3UQ5 A,3UQ5 B,3UQ5 C,3UQ5 D,3UQ5 E,3UQ7 A,3UQ7 B,3UQ7 C,3UQ7 D,3UQ7 E,4UQQ A,4UQQ B,4UQQ C,4UQQ D,3USG A,3USG B,3USI A,3USJ A,3USK A,3USK B,3USL A,3USL B,3USM A,3USM B,3USO A,3USO B,3USP A,3USP B,4US3 A,4US4 A,3UTV A,3UTW A,3UTX A,3UTY A,1UUN A,1UUN B,1UUN C,1UUN D,1UUN E,1UUN F,1UUN G,1UUN H,2UUh A,2UUh B,2UUh C,2UUI A,2UUI B,2UUI C,3UU2 A,3UU2 B,3UU2 C,3UU3 A,3UU3 B,3UU3 C,3UU3 D,3UU3 E,3UU4 A,3UU4 B,3UU4 C,3UU4 D,3UU4 E,3UU5 A,3UU5 B,3UU5 C,3UU5 D,3UU5 E,3UU6 A,3UU6 B,3UU6 C,3UU6 D,3UU6 E,3UU8 A,3UU8 B,3UU8 C,3UU8 D,3UU8 E,3UUB A,3UUB B,3UUB C,3UUB D,3UUB E,4UU0 A,4UU1 A,4UUJ C,4UUJ D,4UUJ E,4UUJ F,1UV3 A,4UV3 A,4UV3 B,4UV3 C,4UV3 D,4UV3 E,4UV3 F,4UV3 G,4UV3 H,4UV3 I,4UVM A,2UWS H,2UWS L,2UWS M,2UWT H,2UWT L,2UWT M,2UWU H,2UWU L,2UWU M,2UWV H,2UWV L,2UWV M,2UWW H,2UWW L,2UWW M,4UWA A,4UWA B,4UWA C,4UWA D,4UWE A,4UWE B,4UWE C,4UWE D,1UXF A,2UX3 H,2UX3 L,2UX3 M,2UX4 H,2UX4 L,2UX4 M,2UX5 H,2UX5 L,2UX5 M,2UXJ H,2UXJ L,2UXJ M,2UXK H,2UXK L,2UXK M,2UXL H,2UXL L,2UXL M,2UXM H,2UXM L,2UXM M,3UX4 A,3UX4 B,3UX4 C,4UX1 A,4UX1 B,4UX2 A,4UX2 B,4UXW A,4UXW B,4UXW C,4UXX A,4UXX B,4UXX C,4UXZ A,4UXZ B,4UXZ C,1UYN X,1UYO X,4UYO A,4UYO B,4UYO C,3UZA A,3UZC A,4V1F A,4V1F B,4V1F C,4V1F D,4V1F E,4V1F F,4V1F G,4V1F H,4V1F I,4V1G A,4V1G B,4V1G C,4V1G D,4V1G E,4V1G F,4V1G G,4V1G H,4V1G I,4V1H A,4V1H B,4V1H C,4V1H D,4V1H E,4V1H F,4V1H G,4V1H H,4V1H I,3V2W A,3V2Y A,1V36 A,1V36 B,1V36 C,1V36 D,1V36 E,1V36 F,1V36 G,3V3C A,3V3C B,3V3C C,3V3C D,3V3C E,3V3C F,3V3C G,3V3C H,3V3C I,3V3C J,3V3C K,3V3C L,3V3C M,3V3C N,3V3Y H,3V3Y L,3V3Y M,3V3Z H,3V3Z L,3V3Z M,4V3G A,4V3H A,1V54 A,1V54 B,1V54 C,1V54 D,1V54 G,1V54 I,1V54 J,1V54 K,1V54 L,1V54 M,1V54 N,1V54 O,1V54 P,1V54 Q,1V54 T,1V54 V,1V54 W,1V54 X,1V54 Y,1V54 Z,1V55 A,1V55 B,1V55 C,1V55 D,1V55 G,1V55 I,1V55 J,1V55 K,1V55 L,1V55 M,1V55 N,1V55 O,1V55 P,1V55 Q,1V55 T,1V55 V,1V55 W,1V55 X,1V55 Y,1V55 Z,2V50 A,2V50 B,2V50 C,2V5Z A,3V5S A,3V5U A,2V60 A,2V61 A,2V8N A,3V89 A,3V8F A,3V8F B,3V8F C,3V8G A,3V8G B,3V8G C,3V8X A,1VCR A,2VDD



A,2VDD B,2VDD C,2VDE A,2VDE B,2VDE C,2VDF A,1VF5 A,1VF5 B,1VF5 C,1VF5 D,1VF5 E,1VF5 F,1VF5 G,1VF5 H,1VF5 N,1VF5 O,1VF5 P,1VF5 Q,1VF5 R,1VF5 S,1VF5 T,1VF5 U,1VFP A,1VGO A,1VGO C,1VGO F,3VG9 A,3VGA A,3VHZ A,3VHZ B,3VHZ C,3VI0 A,3VI0 B,3VI0 C,1VJM A,1VJM B,1VJM C,2VL0 A,2VL0 B,2VL0 C,2VL0 D,2VL0 E,3VMQ A,3VMR A,3VMS A,3VMT A,2VOY B,2VOY C,2VOY D,2VOY E,2VOY G,2VOY H,2VOY K,2VOY L,3VOU A,3VOU B,3VOU C,3VOU D,2VPW C,2VPW G,2VPX C,2VPX G,2VPY C,2VPY G,2VPZ C,2VPZ G,2VQI A,1VRN H,1VRN L,1VRN M,1VRY A,2VR0 C,2VR0 F,2VRL A,2VRM A,3VR8 C,3VR8 D,3VR9 C,3VR9 D,3VRA C,3VRA D,3VRB C,3VRB D,2VT4 A,2VV5 A,2VV5 B,2VV5 C,2VV5 D,2VV5 E,2VV5 F,2VV5 G,3VVK A,3VVK B,3VVK C,3VVN A,3VVO A,3VVP A,3VVR A,3VVS A,3VW7 A,3VY8 X,3VY8 A,3VY8 B,3VY9 X,3VY9 A,3VY9 B,1VZ1 A,3VZT X,3VZT A,3VZT B,3VZU X,3VZU A,3VZU B,3VZW X,3VZW A,3VZW B,2W0F C,2W0F D,2W0F E,2W0F F,2W16 A,2W1B A,2W1B B,2W1B C,2W1P A,2W1P B,2W1P C,2W1P D,2W2E A,2W2E B,2W2E C,2W2E D,3W4T A,1W5C A,1W5C B,1W5C C,1W5C D,1W5C E,1W5C F,1W5C G,1W5C H,1W5C I,1W5C J,1W5C K,1W5C L,1W5C X,1W5C Y,2W5J A,2W5J B,2W5J C,2W5J D,2W5J E,2W5J F,2W5J G,2W5J H,2W5J I,2W5J J,2W5J K,2W5J L,2W5J M,2W5J V,3W5A A,3W5A C,3W5B A,3W5C A,3W5D A,2W6T A,2W6U A,4W6V A,2W75 A,2W76 A,2W77 A,2W78 A,3W9H A,3W9H B,3W9H C,3W9I A,3W9I B,3W9I C,3W9J A,3W9J B,3W9J C,3W9T A,3W9T C,3W9T G,3W9T B,3W9T F,3W9T E,3W9T D,1WAZ A,3WAZ A,3WAK A,4WAB A,4WAB B,4WAV A,3WBN A,2WDQ C,2WDQ D,2WDQ G,2WDQ H,2WDQ K,2WDQ L,2WDR C,2WDR D,2WDR G,2WDR H,2WDV C,2WDV D,2WDV G,2WDV H,2WDV K,2WDV L,3WDO A,4WD7 A,4WD7 B,4WD7 C,4WD7 D,4WD7 E,4WD8 A,4WD8 B,4WD8 C,4WD8 D,4WD8 E,3WFB B,3WFB C,3WFC B,3WFC C,3WFD B,3WFD C,3WFE B,3WFE C,4WFE A,4WFE B,4WFF A,4WFF B,4WFG A,4WFG B,4WFG H,4WFG B,2WGM A,2WGM B,2WGM C,2WGM D,2WGM E,2WGM F,2WGM G,2WGM H,2WGM I,2WGM J,2WGM K,3WG7 A,3WG7 B,3WG7 C,3WG7 D,3WG7 G,3WG7 I,3WG7 J,3WG7 K,3WG7 L,3WG7 M,3WG7 N,3WG7 O,3WG7 P,3WG7 Q,3WG7 T,3WG7 V,3WG7 W,3WG7 X,3WG7 Y,3WG7 Z,3WGU C,3WGU D,3WGU E,3WGV C,3WGV D,3WGV E,4WGV A,4WGV C,4WGW A,4WGW C,2WIE A,2WIE B,2WIE C,2WIE D,2WIE E,2WIE F,2WIE G,2WIE H,2WIE I,2WIE J,2WIE K,2WIE L,2WIE M,2WIE N,2WIE P,2WIT A,2WIT B,2WIT C,3WI4 A,3WI4 B,3WI4 C,3WI5 A,3WI5 B,3WI5 C,4WIB A,4WIB B,4WIS A,4WIS B,4WIT A,4WIT B,2WJK A,2WJK B,2WJK C,2WJL A,2WJL B,2WJL C,2WJM H,2WJM L,2WJM M,2WJN H,2WJN M,2WJN L,2WJQ A,2WJR A,2WLH A,2WLH B,2WLH C,2WLH D,2WLI A,2WLI B,2WLI D,2WLI E,2WLJ A,2WLJ B,2WLJ C,2WLJ D,2WLK A,2WLK B,2WLK C,2WLK D,2WLL A,2WLL B,2WLL C,2WLL D,2WLM A,2WLM B,2WLM C,2WLM D,2WLN A,2WLN B,2WLN C,2WLN D,2WLO A,2WLO B,3WME A,3WME B,3WMF A,3WMF B,3WMM A,3WMM L,3WMM M,3WMM H,3WMM A,3WMM B,3WMM D,3WMM E,3WMM F,3WMM G,3WMM I,3WMM J,3WMM K,3WMM N,3WMM O,3WMM P,3WMM R,3WMM S,3WMM T,3WMM U,3WMM V,3WMM W,3WMM X,3WMM Y,3WMM Z,3WMM 1,3WMM 2,3WMM 3,3WMM 4,3WMM 5,3WMM 6,3WMM 7,3WMM 8,3WMM 9,3WMM 0,4WMZ A,3WO6 A,3WO7 A,4WO1 A,4WOL A,4WOL B,1WP1 A,1WP1 C,1WP1 D,1WPG A,2WP9 C,2WP9 D,2WP9 G,2WP9 H,2WP9 K,2WP9 L,2WPD J,2WPD K,2WPD L,2WPD M,2WPD N,2WPD O,2WPD P,2WPD Q,2WPD R,2WPD S,2WQY C,2WQY D,3WQJ A,3WQJ B,3WQJ C,1WRG

A,2WS3 C,2WS3 D,2WS3 G,2WS3 H,2WS3 K,2WS3 L,2WSC A,2WSC  
 B,2WSC F,2WSC G,2WSC H,2WSC I,2WSC J,2WSC K,2WSC L,2WSC  
 R,2WSC 1,2WSC 2,2WSC 3,2WSC 4,2WSE A,2WSE B,2WSE F,2WSE  
 G,2WSE H,2WSE I,2WSE J,2WSE K,2WSE L,2WSE R,2WSE 1,2WSE  
 2,2WSE 3,2WSE 4,2WSF A,2WSF B,2WSF F,2WSF G,2WSF H,2WSF I,2WSF  
 J,2WSF K,2WSF L,2WSF R,2WSF 1,2WSF 2,2WSF 3,2WSF 4,2WSW  
 A,2WSW B,2WSW C,2WSX A,2WSX B,2WSX C,1WU0 A,2WU2 C,2WU2  
 D,2WU2 G,2WU2 H,2WU2 K,2WU2 L,2WU5 C,2WU5 D,2WU5 G,2WU5  
 H,2WU5 K,2WU5 L,3WU2 A,3WU2 B,3WU2 C,3WU2 D,3WU2 E,3WU2  
 F,3WU2 H,3WU2 I,3WU2 J,3WU2 K,3WU2 L,3WU2 M,3WU2 T,3WU2 Y,3WU2  
 X,3WU2 Z,3WU2 A,3WU2 B,3WU2 C,3WU2 D,3WU2 E,3WU2 F,3WU2  
 H,3WU2 I,3WU2 J,3WU2 K,3WU2 L,3WU2 M,3WU2 T,3WU2 Y,3WU2 X,3WU2  
 Z,2WVP A,3WVF A,4WW3 A,2WX5 H,2WX5 L,2WX5 M,3WXV A,3WXW  
 A,1X0I 1,1X0K 1,1X0S A,1X0S B,1X0S C,4X1H A,2X27 X,2X2V A,2X2V  
 B,2X2V C,2X2V D,2X2V E,2X2V F,2X2V G,2X2V H,2X2V I,2X2V J,2X2V  
 K,2X2V L,2X2V M,3X29 A,3X2Q A,3X2Q B,3X2Q C,3X2Q D,3X2Q G,3X2Q  
 I,3X2Q J,3X2Q K,3X2Q L,3X2Q M,3X2Q N,3X2Q O,3X2Q P,3X2Q Q,3X2Q  
 T,3X2Q V,3X2Q W,3X2Q X,3X2Q Y,3X2Q Z,3X2R D,3X2R A,3X2R B,3X2R  
 C,3X2R E,3X2R F,3X2R G,3X2R H,3X2R I,4X2S A,4X2S B,4X2S C,3X3B  
 A,3X3B B,3X3C A,3X3C B,4X31 A,4X31 B,4X31 C,4X32 A,4X32 B,4X32  
 C,2X4M A,2X55 A,2X56 A,2X5U H,2X5U L,2X5U M,2X5V H,2X5V M,2X5V  
 L,4X5M B,4X5M C,4X5N A,4X5N B,4X5T A,4X5T B,4X5T C,4X5T D,4X5T  
 E,2X6A A,2X6A B,2X6A C,2X6A D,2X6B A,2X6B B,2X6B C,2X6B D,2X6C  
 A,2X6C B,2X6C C,2X6C D,2X72 A,2X72 C,2X79 A,2X9K A,4XDJ A,4XDJ  
 B,4XDL A,4XDL B,2XE1 A,2XE1 B,2XE1 C,2XE2 A,2XE2 B,2XE2 C,2XE3  
 A,2XE3 C,2XE3 D,2XE5 A,2XE5 B,2XE5 C,4XEE A,4XES A,1XFH A,1XFH  
 B,1XFH C,2XFN A,2XFO A,2XFP A,2XFQ A,2XFU A,2XG6 A,2XG6 B,2XG6  
 C,1XIO A,1XIO B,4XIG M,4XIG N,1XJI A,1XKH A,1XKW A,4XK8 A,4XK8  
 B,4XK8 F,4XK8 G,4XK8 H,4XK8 I,4XK8 J,4XK8 K,4XK8 L,4XK8 1,4XK8  
 2,4XK8 3,4XK8 4,1XL4 A,1XL4 B,1XL4 C,1XL4 D,1XL6 A,1XL6 B,1XL6 C,1XL6  
 D,1XME A,1XME B,1XME C,2XMN A,2XMN B,2XMN C,1XNU A,1XNU B,1XNU  
 C,1XNU D,1XNU E,2XND J,2XND K,2XND L,2XND M,2XND N,2XND O,2XND  
 P,2XND Q,4XNI A,4XNJ A,4XNK A,4XNL A,4XNU A,4XNV A,4XNW A,4XNX  
 A,2XOK K,2XOK L,2XOK M,2XOK N,2XOK O,2XOK P,2XOK Q,2XOK R,2XOK  
 S,2XOK T,2XOV A,2XOW A,4XOU A,1XP5 A,4XP1 A,4XP4 A,4XP5 A,4XP6  
 A,4XP9 C,4XPA A,4XPB A,4XPF A,4XPG A,4XPH A,4XPT A,1XQE A,1XQE  
 B,1XQE C,1XQF A,1XQF B,1XQF C,2XQ2 A,2XQ2 B,2XQ3 A,2XQ3 B,2XQ3  
 C,2XQ3 D,2XQ3 E,2XQ4 A,2XQ4 B,2XQ4 C,2XQ4 D,2XQ4 E,2XQ5 A,2XQ5  
 B,2XQ5 C,2XQ5 D,2XQ5 E,2XQ6 A,2XQ6 B,2XQ6 C,2XQ6 D,2XQ6 E,2XQ7  
 A,2XQ7 B,2XQ7 C,2XQ7 D,2XQ7 E,2XQ8 A,2XQ8 B,2XQ8 C,2XQ8 D,2XQ8  
 E,2XQ9 A,2XQ9 B,2XQ9 C,2XQ9 D,2XQ9 E,2XQA A,2XQA B,2XQA C,2XQA  
 D,2XQA E,2XQS A,2XQS B,2XQS C,2XQS D,2XQS E,2XQS F,2XQS G,2XQS  
 H,2XQS I,2XQS J,2XQS K,2XQS L,2XQS M,2XQS N,2XQS P,2XQT A,2XQT  
 B,2XQT C,2XQT D,2XQT E,2XQT F,2XQT G,2XQT H,2XQT I,2XQT J,2XQT  
 K,2XQT L,2XQT M,2XQT N,2XQT P,2XQU A,2XQU B,2XQU C,2XQU D,2XQU  
 E,2XQU F,2XQU G,2XQU H,2XQU I,2XQU J,2XQU K,2XQU L,2XQU M,2XQU  
 N,2XQU P,1XRD A,2XTU A,2XTV A,4XTL A,4XTN A,4XTN B,4XTO A,4XTO  
 B,2XUT A,4XU4 A,4XU4 B,4XU4 C,4XU5 A,4XU5 B,4XU5 C,4XU6 A,4XU6  
 B,4XU6 C,4XXJ A,4XXJ B,4XXJ C,2XZB A,2XZB B,2Y00 A,2Y01 A,2Y02  
 A,2Y03 A,2Y04 A,2Y0H A,2Y0K A,2Y0L A,4Y1K A,4Y1K B,4Y1K C,1Y2L

A,2Y2X A,4Y28 A,4Y28 B,4Y28 I,4Y28 J,4Y28 F,4Y28 G,4Y28 L,4Y28 H,4Y28  
 K,4Y28 2,4Y28 4,4Y28 1,4Y28 3,1Y36 A,4Y3U A,4Y3U B,4Y3U C,1Y4Z  
 C,1Y4Z F,1Y5D A,1Y5I C,1Y5I F,1Y5L C,1Y5L F,1Y5N C,1Y5N F,2Y5Y A,2Y69  
 A,2Y69 B,2Y69 C,2Y69 D,2Y69 G,2Y69 I,2Y69 J,2Y69 K,2Y69 L,2Y69 M,2Y69  
 N,2Y69 O,2Y69 P,2Y69 Q,2Y69 T,2Y69 V,2Y69 W,2Y69 X,2Y69 Y,2Y69  
 Z,4Y6K A,4Y7J A,4Y7J B,4Y7J C,4Y7J D,4Y7J E,4Y7K A,4Y7K B,4Y7K  
 C,4Y7K D,4Y7K E,1Y8S A,1Y9C A,4YAY A,2YBB C,2YBB D,2YBB E,2YBB  
 G,2YBB J,2YBB K,2YBB L,2YBB M,2YBB N,2YBB O,2YBB R,2YBB T,2YBB  
 U,2YBB V,2YBB W,2YBB X,2YBB C,2YBB D,2YBB E,2YBB G,2YBB J,2YBB  
 K,2YBB M,2YBB N,2YBB O,2YBB P,4YB9 D,4YBQ A,4YBQ B,1YC9 A,1YC9  
 B,1YC9 C,1YCE A,1YCE B,1YCE C,1YCE D,1YCE E,1YCE F,1YCE G,1YCE  
 H,1YCE I,1YCE J,1YCE K,2YCW A,2YCX A,2YCY A,2Y CZ A,4YCL A,4YCM  
 A,4YCN A,4YCR A,4YCR B,4YCR C,2YDO A,2YDV A,1YEW A,1YEW B,1YEW  
 C,1YEW E,1YEW F,1YEW G,1YEW I,1YEW J,1YEW K,2YEV A,2YEV B,2YEV  
 C,4YEU A,4YEU B,4YEU C,4YEU D,4YEU E,1YF6 L,1YF6 M,1YF6 H,2YFY  
 A,1YG1 A,1YG7 A,2YIU A,2YIU B,2YIU C,2YIU D,2YIU E,2YIU F,2YKS  
 A,2YKS B,2YKS C,2YKS D,2YKS E,4YK5 A,4YK5 B,4YK5 C,4YL0 A,4YL0  
 B,4YL0 C,4YL1 A,4YL1 B,4YL1 C,4YL3 A,4YL3 B,4YL3 C,1YMG A,1YMG  
 B,1YMG C,1YMG D,4YMK A,4YMK D,4YMS D,4YMS C,4YMT C,4YMT  
 B,4YMU D,4YMU C,4YMV D,4YMV C,4YMW D,4YMW C,2YN6 A,2YN6  
 B,2YN6 C,2YN6 D,2YN6 E,2YN9 A,2YN9 B,2YNK A,1YO9 A,1YO9 B,1YO9  
 F,1YO9 G,1YO9 H,1YO9 I,1YO9 J,1YO9 K,1YO9 L,1YO9 1,1YO9 2,1YO9  
 3,1YO9 4,2YOE A,2YOE B,2YOE C,2YOE D,2YOE E,2YPT A,1YQ3 C,1YQ3  
 D,1YQ4 C,1YQ4 D,1YST L,1YST M,1YST H,2YSU A,4YSX C,4YSX D,4YSY  
 C,4YSY D,4YSZ C,4YSZ D,4YT0 C,4YT0 D,4YTM C,4YTM D,4YTN C,4YTN  
 D,4YTP C,4YTP D,2YVX A,2YVX B,2YXQ A,2YXQ B,2YXQ C,2YXR A,2YXR  
 B,2YXR C,4YZF A,4YZF B,4YZI A,4YZI B,4Z34 A,4Z35 A,4Z36 A,4Z3N A,4Z3P  
 A,2Z55 A,2Z55 C,2Z55 F,2Z5X A,2Z5Y A,1Z65 A,2Z73 A,4Z7F A,4Z7F B,1Z8E  
 A,1Z98 A,1Z98 B,1Z98 C,1Z98 D,1Z9J A,1Z9J B,1Z9J C,1Z9K A,1Z9K B,1Z9K  
 C,4Z90 A,4Z90 B,4Z90 C,4Z90 D,4Z90 E,4Z91 A,4Z91 B,4Z91 C,4Z91 D,4Z91  
 E,2ZBD A,2ZBE A,2ZBF A,2ZBG A,4ZBM A,4ZBM C,4ZBM D,4ZBM E,1ZC7  
 A,1ZCD A,1ZCD C,2ZD9 A,2ZD9 B,2ZD9 C,2ZD9 D,3ZDQ A,3ZDQ B,3ZE3  
 A,3ZE3 B,3ZE3 C,3ZE4 A,3ZE4 B,3ZE4 C,3ZE5 A,3ZE5 B,3ZE5 C,3ZEB  
 A,3ZEV A,2ZFE A,2ZFE B,2ZFE C,2ZFG A,2ZFG B,2ZFG C,2ZIY A,2ZJS  
 Y,2ZJS E,3ZJZ A,3ZJZ B,3ZJZ E,3ZJZ F,3ZK1 A,3ZK1 B,3ZK1 C,3ZK1 D,3ZK1  
 E,3ZK1 F,3ZK1 G,3ZK1 H,3ZK1 I,3ZK1 J,3ZK1 K,3ZK2 A,3ZK2 B,3ZK2  
 C,3ZK2 D,3ZK2 E,3ZK2 F,3ZK2 G,3ZK2 H,3ZK2 I,3ZK2 J,3ZK2 K,3ZKR  
 A,3ZKR B,3ZKR C,3ZKR D,3ZKR E,1ZLL A,1ZLL B,1ZLL C,1ZLL D,1ZLL  
 E,2ZLD B,2ZLD E,2ZLD G,2ZLE D,2ZLE N,2ZLE P,3ZMH A,3ZMI A,3ZMJ  
 A,1ZOY C,1ZOY D,3ZO6 A,3ZO6 B,3ZO6 C,3ZO6 D,3ZO6 E,3ZO6 F,3ZO6  
 H,3ZO6 I,3ZO6 J,3ZO6 K,3ZO6 L,3ZO6 M,3ZOJ A,3ZOJ B,3ZOJ C,3ZOJ  
 D,3ZOT A,4ZOW A,1ZP0 C,1ZP0 D,3ZPQ A,3ZPR A,4ZP0 A,4ZP2 A,2ZQP  
 Y,2ZQP E,1ZRT C,1ZRT D,1ZRT E,1ZRT P,1ZRT Q,1ZRT R,3ZRS A,3ZRS  
 B,3ZRS C,3ZRS D,3ZRY J,3ZRY K,3ZRY L,3ZRY M,3ZRY N,3ZRY O,3ZRY  
 P,3ZRY Q,3ZRY R,3ZRY S,4ZR0 A,4ZR1 A,1ZTI A,2ZT9 A,2ZT9 B,2ZT9  
 C,2ZT9 D,2ZT9 E,2ZT9 F,2ZT9 G,2ZT9 H,2ZT9 I,2ZT9 J,2ZT9 K,2ZT9 L,2ZT9  
 M,2ZT9 N,2ZT9 P,2ZT9 Q,2ZUP B,2ZUQ A,3ZUM H,3ZUM L,3ZUM M,3ZUM  
 H,3ZUW L,3ZUW M,3ZUX A,3ZUY A,4ZUD A,1ZV0 B,1ZWI C,1ZWI D,1ZWI  
 E,1ZWI F,2ZW3 A,2ZW3 B,2ZW3 C,2ZW3 D,2ZW3 E,2ZW3 F,4ZW9 A,4ZWB  
 A,4ZWC A,4ZWJ A,2ZXE A,2ZXE B,2ZXE G,2ZXW A,2ZXW B,2ZXW C,2ZXW

D,2ZXW G,2ZXW I,2ZXW J,2ZXW K,2ZXW L,2ZXW M,2ZXW N,2ZXW  
O,2ZXW P,2ZXW Q,2ZXW T,2ZXW V,2ZXW W,2ZXW X,2ZXW Y,2ZXW  
Z,1ZYY A,1ZYY B,2ZY9 A,2ZY9 B,4ZYO A,4ZYR A,1ZZA A,2ZZ9 A,2ZZ9  
B,2ZZ9 C,2ZZ9 D,2ZZL A,2ZZL B,2ZZL C

The PDB ID is followed by the chain ID used in this study.

## II. Supplemental Figures

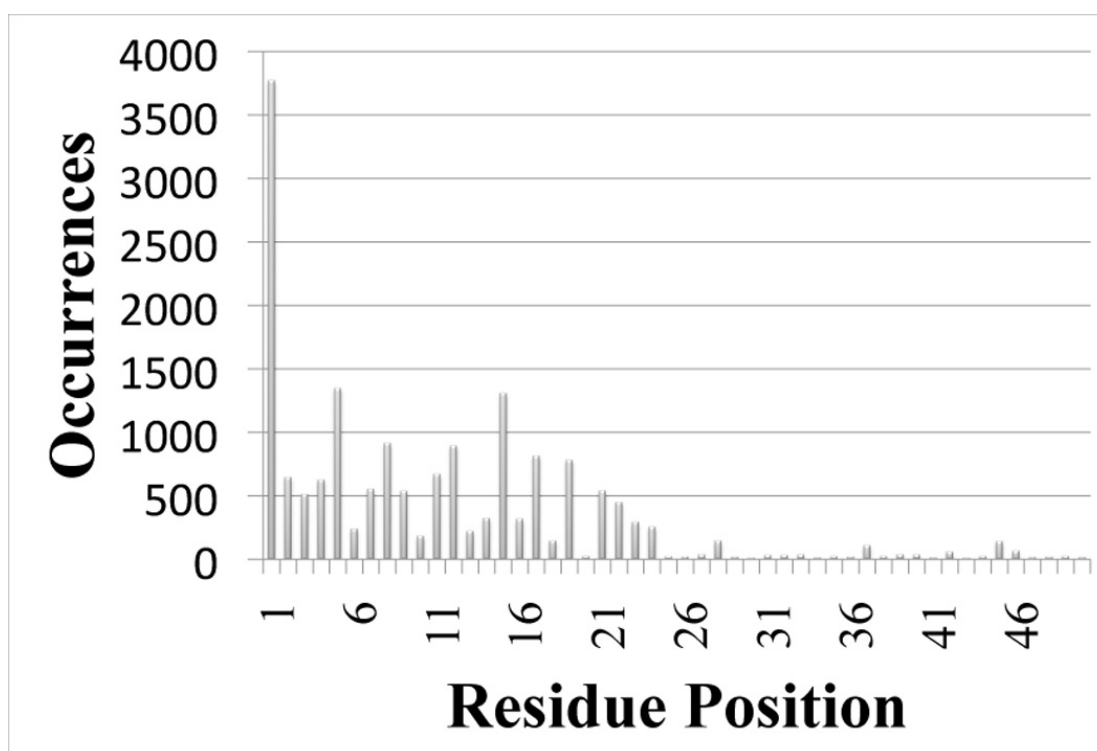

**Figure S1. Distribution of identified mutants over HokC sequence.** The number of mutants observed (Occurrences, Y axis) at every residue position (X axis) along the HokC sequence are presented as histograms.

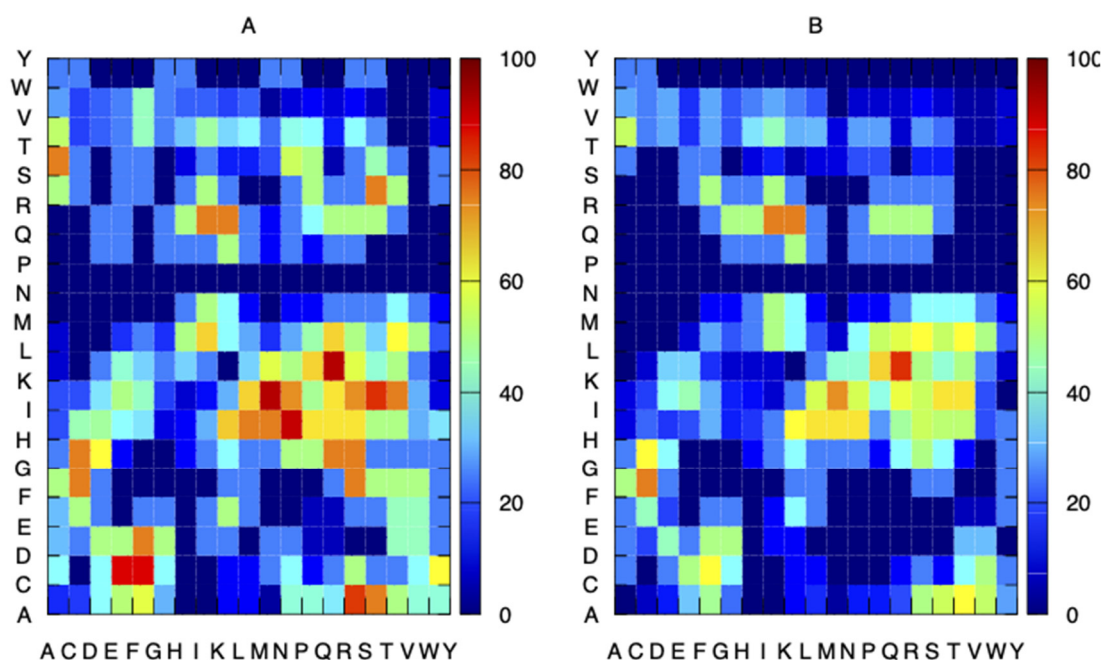

**Figure S2. Heat map for HokC substitutions.** The frequency of every substitution (Y axis) on any of the original HokC amino acids (X axis) rendering a wild-type (A) and mutant (B) phenotype are represented by a color scale, where the dark blue represent the lowest frequency and dark red the highest. The data for this figure was derived from Table S3A and S3B.

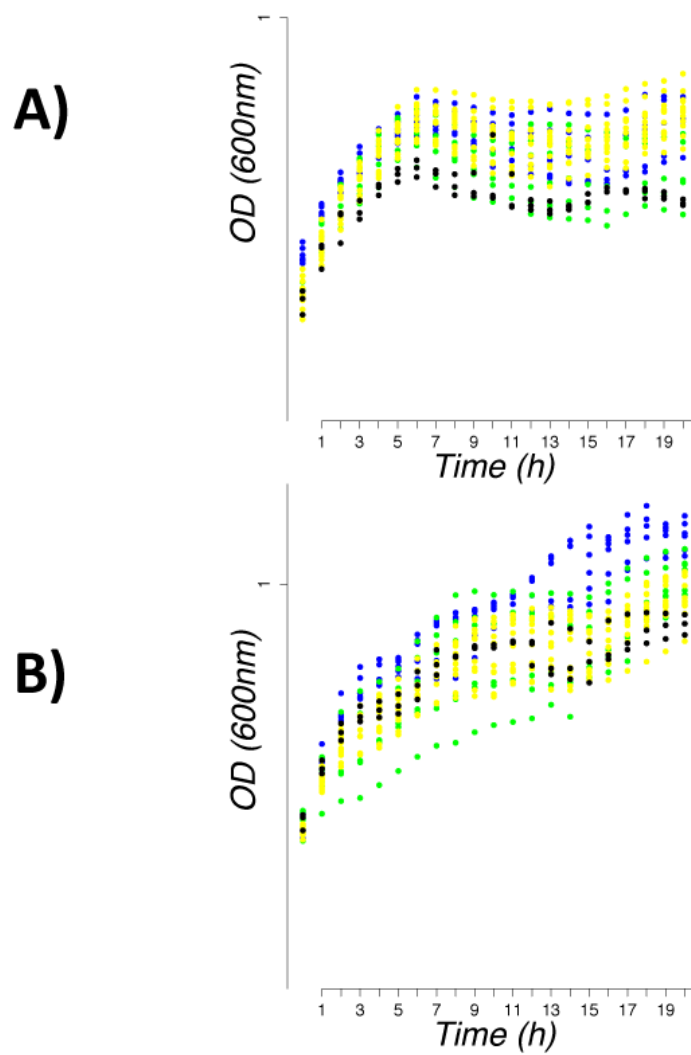

**Figure S3. Cell growth of HokC fusions.** *E. coli* cells expressing HokC (black circles) or any selected variant were grown to reach 0.4-0.5 of optical density (OD)

measured at 600 nm in rich media and then were exposed to an inducer of HokC-GFP (IPTG) or HokC-phoA (Arabinose) expression. The image presents in colored circles each variant: Met7Trp (blue circles), Ile12Ser (green), Met7Trp-Ile12Ser (yellow). **A)** Optical density measured during 20 h for cells expressing HokC, or any of its variants, fused to GFP. **B)** Optical density measured during 20 h for cells expressing HokC, or any of its variants, fused to phoA. Each panel presents the results of 5 independent experimental results.

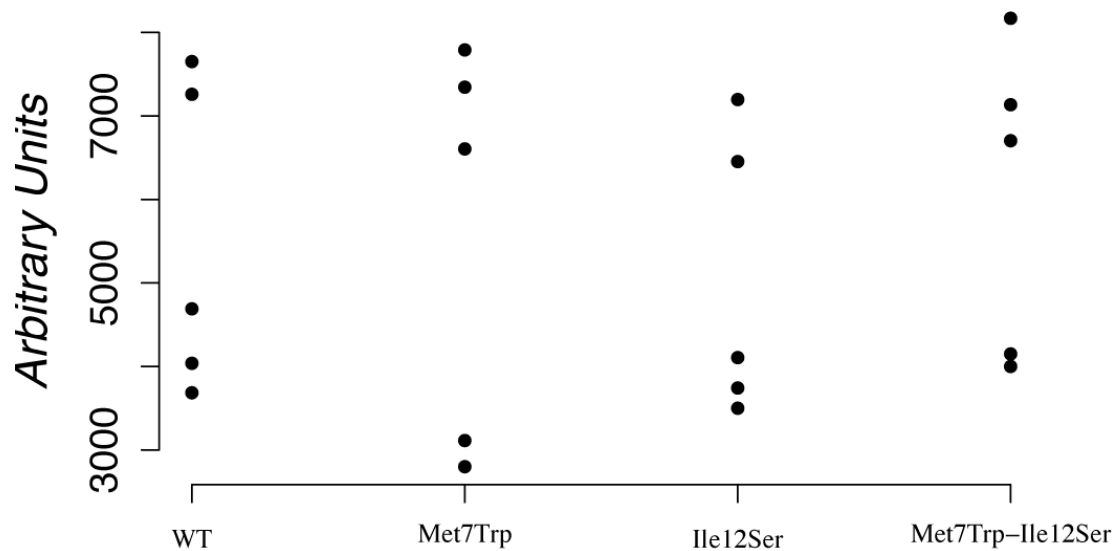

**Figure S4. Phosphatase activity measured on cells expressing HokC or variants.** Arbitrary units of phosphatase activity measured on cells expressing HokC, HokC:Met7Trp, HokC:Ile12Ser or HokC:Met7Trp-Ile12Ser. Please refer to Methods for the details on how this activity was measured.
